# Supplementary material
Source: PubMed Central journal article supplement (PMC2631387)
Supplement: NIHMS63786-supplement-1si20060303_08.pdf [file NIHMS63786-supplement-1si20060303_08.pdf]

# Synthetic Studies Towards Manno-peptimycin-E: Synthesis of the O-Linked Tyrosine 1,4- $\alpha,\alpha$ -Manno,Manno-Pyranosyl-Pyranoside.

Ravula Satheesh Babu, Sanjeeva R. Guppi and George A. O'Doherty\*

*Department of Chemistry, West Virginia University, Morgantown, WV 26506*

[George.ODoherty@mail.wvu.edu](mailto:George.ODoherty@mail.wvu.edu)

## Supporting Information

|                                                                     |      |
|---------------------------------------------------------------------|------|
| Section A: General Information                                      | S-2  |
| Section B: Experimental Procedures                                  | S-3  |
| Section C: $^1\text{H}$ NMR and $^{13}\text{C}$ NMR Spectra         | S-22 |
| Section D: The relative stereochemistry of <b>3a</b> and <b>14a</b> | S-59 |

## Section A: General Information.

General Methods: Liquid chromatography was performed using the indicated solvent system on ICN reagent silica gel 60 (60-200 mesh). Ether, tetrahydrofuran, methylene chloride and methanol were dried by passing through activated alumina columns with argon gas pressure. Hexanes refer to the petroleum fraction bp 40-60 °C. Commercial reagents were used without purification unless otherwise noted.  $^1\text{H}$  and  $^{13}\text{C}$  spectra were recorded on Jeol 270 and 600 MHz spectrometers. Chemical shifts are reported relative to internal tetramethylsilane ( $\delta$  0.00) or  $\text{CHCl}_3$  ( $\delta$  7.26) for  $^1\text{H}$  and  $\text{CHCl}_3$  ( $\delta$  77.0) for  $^{13}\text{C}$ . Air- and/or moisture-sensitive reactions were carried out under an atmosphere of argon/nitrogen using oven-dried glassware and standard syringe/septa techniques. Melting points are uncorrected.

## Section B: Experimental Procedures.

**(2*S*,6*R*)-6-[(2'*S*)-2'-*N*-Carbobenzyloxy-D-tyrosine methoxycarbonyl]-2-*tert*-butyl-dimethyl-silanyloxymethyl-6*H*-pyran-3-one (**8**):**

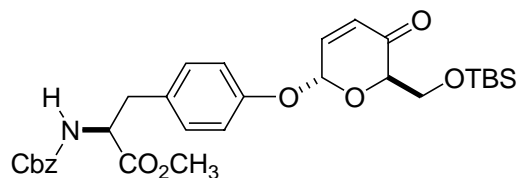

A CH<sub>2</sub>Cl<sub>2</sub> (0.7 mL) solution of compound **6** (260 mg, 0.72 mmol) and Cbz-D-tyrosine methyl ester **5** (238 mg, 0.726 mmol) was cooled to 0 °C. A CH<sub>2</sub>Cl<sub>2</sub> (0.7 mL) solution of Pd<sub>2</sub>(dba)<sub>3</sub>·CHCl<sub>3</sub> (18 mg, 2.5 mol%) and PPh<sub>3</sub> (16 mg, 10 mol%) was added to the reaction mixture at 0 °C. The reaction mixture was stirred at 0 °C for 3 hours. The reaction mixture was quenched with 5 mL of satd. aq. NaHCO<sub>3</sub>, extracted (3 x 5 mL) with Et<sub>2</sub>O, dried (Na<sub>2</sub>SO<sub>4</sub>), and concentrated under reduced pressure. The crude product was purified using silica gel flash chromatography eluting with 14% EtOAc/hexanes to give enone **8** (380 mg, 0.66 mmol, 92%) as viscous oil. *R*<sub>f</sub> (30% EtOAc/hexanes) = 0.42; [α]<sub>D</sub><sup>26</sup> = + 0.8 (*c* = 1, CH<sub>2</sub>Cl<sub>2</sub>); IR (thin film, cm<sup>-1</sup>) 3351, 2952, 1752, 1725, 1509, 1256, 1219, 1151, 995, 836; <sup>1</sup>H NMR (600 MHz, CDCl<sub>3</sub>) δ 7.35 (m, 5H), 7.05 (m, 4H), 6.97 (dd, *J* = 10.2, 3.6 Hz, 1H), 6.22 (d, *J* = 10.8 Hz, 1H), 5.93 (d, *J* = 3.6 Hz, 1H), 5.30 (d, *J* = 7.8 Hz, 1H), 5.10 (d, *J* = 12.6 Hz, 1H), 5.07 (d, *J* = 12.6 Hz, 1H), 4.62 (dd, *J* = 13.8, 6.0 Hz, 1H), 4.54 (dd, *J* = 4.8, 3.0 Hz, 1H), 4.05 (dd, *J* = 11.4, 4.8 Hz, 1H), 4.02 (dd, *J* = 11.4, 2.4 Hz, 1H), 3.71 (s, 3H), 3.10 (dd, *J* = 13.2, 5.4 Hz, 1H), 3.04 (dd, *J* = 14.4, 6.0 Hz, 1H), 0.84 (s, 9H), 0.05 (s, 3H), 0.04 (s, 3H); <sup>13</sup>C NMR (150 MHz, CDCl<sub>3</sub>) δ 194.2, 174.8, 156.1, 155.4, 151.6, 150.0, 142.6, 136.0, 130.3(2C), 130.0, 128.6, 128.4(2C), 128.0, 127.9, 117.0, 91.9, 76.6, 66.8, 62.5, 54.7, 52.2, 37.2, 25.7(3C), 18.1, -5.44, -5.48; CIHRMS Calcd for [C<sub>30</sub>H<sub>39</sub>NO<sub>8</sub>SiNa<sup>+</sup>]: 592.2337. Found 592.2290.

**3-{4-[6-(*tert*-Butyl-dimethylsilanyloxymethyl)-5-hydroxy-5,6-dihydro-2*H*-pyran-2-yloxy]-phenyl}-2- *N*-carbobenzyloxy-*D*-tyrosine methyl ester (**9**):**

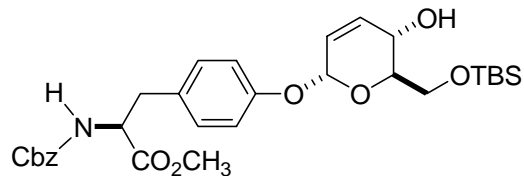

The enone compound **8** (320 mg, 0.562 mmol) was dissolved in 0.5 mL of CH<sub>2</sub>Cl<sub>2</sub> and 0.5 mL MeOH in round bottom flask and cooled -78 °C then NaBH<sub>4</sub> (21 mg, 0.562 mmol) was added and the reaction mixture was stirred at -78 °C for 3 hours and on completion, monitored by TLC, reaction mixture was diluted with ether and was quenched with 5 mL of satd. aq. NaHCO<sub>3</sub>, extracted (3 x 5 mL) with Et<sub>2</sub>O, dried (Na<sub>2</sub>SO<sub>4</sub>), and concentrated under reduced pressure. The crude product was purified using silica gel flash chromatography eluting with 18% EtOAc/hexanes to give **9** (300 mg, 0.525 mmol, 87%) as viscous oil.  $R_f$  (30% EtOAc/hexanes) = 0.30;  $[\alpha]_D^{26} = + 29.0$  ( $c = 1$ , CH<sub>2</sub>Cl<sub>2</sub>); IR (thin film, cm<sup>-1</sup>) 3386, 2925, 1459, 1255, 1069, 1027, 838; <sup>1</sup>H NMR (600 MHz, CDCl<sub>3</sub>)  $\delta$  7.32 (m, 5H), 6.98 (m, 4H), 6.08 (d,  $J = 10.2$  Hz, 1H), 5.88 (ddd,  $J = 10.2, 2.4, 2.4$  Hz, 1H), 5.57 (d,  $J = 1.8$  Hz, 1H), 5.21 (d,  $J = 7.8$  Hz, 1H), 5.11 (d,  $J = 13.2$  Hz, 1H), 5.08 (d,  $J = 12.0$  Hz, 1H), 4.62 (dd,  $J = 13.2, 5.4$  Hz, 1H), 4.28 (dd,  $J = 9.0, 1.8$  Hz, 1H), 3.89 (dd,  $J = 10.2, 4.8$  Hz, 1H), 3.84 (dq,  $J = 12.0, 7.2, 4.8$  Hz, 1H), 3.75 (dd,  $J = 9.6, 6.6$  Hz, 1H), 3.32 (s, 3H), 3.08 (dd,  $J = 13.8, 5.4$  Hz, 1H), 3.04 (dd,  $J = 13.8, 5.4$  Hz, 1H), 3.02 (d,  $J = 3.0$  Hz, 1H), 0.88 (s, 9H), 0.08 (s, 3H), 0.07 (s, 3H); <sup>13</sup>C NMR (150 MHz, CDCl<sub>3</sub>)  $\delta$  171.9, 156.5, 133.3, 130.3, 130.2(2C), 128.5(2C), 128.4, 128.1, 128.0, 124.8, 116.9(2C), 115.5, 92.8, 70.7, 66.9, 66.5, 65.1, 54.8, 52.3, 52.2, 37.2, 25.7(3C), 18.1, -5.5, -5.6; CIHRMS Calcd for [C<sub>30</sub>H<sub>41</sub>NO<sub>8</sub>SiNa<sup>+</sup>]: 594.2493 Found 594.2467.

**(1'S, 4'S, 5'R, 1S, 5R)-1-[1'-N-carbobenzyloxy-D-tyrosine methoxycarbonyl -5-(*tert*-butyl-dimethylsilanyloxymethyl)-1',4'-dihydro-5'H-pyran-4'-yloxy]-5-(*tert*-butyl-dimethylsilanyloxymethyl) -1H-pyran-4-one (4):**

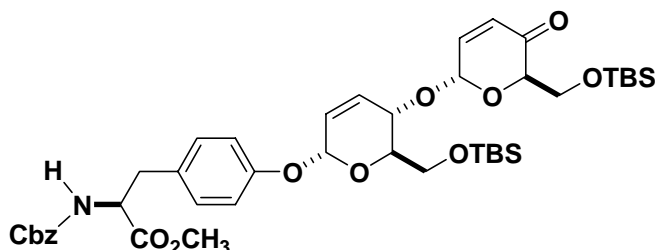

A CH<sub>2</sub>Cl<sub>2</sub> (0.5 mL) solution of compound **6** (280 mg, 0.49 mmol) and alcohol **9** (175 mg, 0.49 mmol) was cooled to 0 °C. A CH<sub>2</sub>Cl<sub>2</sub> (0.5 mL) solution of Pd<sub>2</sub>(dba)<sub>3</sub>.CHCl<sub>3</sub> (12 mg, 2.5 mol%) and PPh<sub>3</sub> (11 mg, 10 mol%) was added to the reaction mixture at 0 °C. The reaction mixture was stirred at 0 °C for 2 hours. The reaction mixture was quenched with 5 mL of satd. aq. NaHCO<sub>3</sub>, extracted (3 x 5 mL) with Et<sub>2</sub>O, dried (Na<sub>2</sub>SO<sub>4</sub>), and concentrated under reduced pressure. The crude product was purified using silica gel flash chromatography eluting with 16% EtOAc/hexanes to give dienone **4** (328 mg, 0.40 mmol, 82%) as viscous oil. *R*<sub>f</sub> (30% EtOAc/hexanes) = 0.44; [α]<sub>D</sub><sup>26</sup> = + 0.15 (*c* = 1, CH<sub>2</sub>Cl<sub>2</sub>); IR (thin film, cm<sup>-1</sup>) 3351, 2952, 1752, 1725, 1509, 1256, 1219, 1151, 995, 836; <sup>1</sup>H NMR (600 MHz, CDCl<sub>3</sub>) δ 7.35 (m, 5H), 7.05 (m, 4H), 6.84 (dd, *J* = 10.2, 3.6 Hz, 1H), 6.23 (d, *J* = 10.8 Hz, 1H), 6.14 (d, *J* = 10.2 Hz, 1H), 5.95 (ddd, *J* = 10.2, 2.4, 1.8 Hz, 1H), 5.62 (d, *J* = 3.6 Hz, 1H), 5.60 (d, *J* = 1.8 Hz, 1H), 5.26 (d, *J* = 8.4 Hz, 1H), 5.10 (d, *J* = 13.2 Hz, 1H), 5.07 (d, *J* = 12.6 Hz, 1H), 4.62 (dd, *J* = 13.8, 6.0 Hz, 1H), 4.59 (d, *J* = 9.0 Hz, 1H), 4.44 (dd, *J* = 3.6, 2.4 Hz, 1H), 4.13 (d, *J* = 3.6 Hz, 1H), 4.10 (dd, *J* = 10.2, 4.2 Hz, 1H), 3.96 (dd, *J* = 10.2, 2.4 Hz, 1H), 3.86 (dq, *J* = 9.6, 1.8 Hz, 1H), 3.81 (dd, *J* = 10.2, 1.8 Hz, 1H), 3.70 (s, 3H), 3.08 (dd, *J* = 13.8, 5.4 Hz, 1H), 3.03 (dd, *J* = 13.8, 6.0 Hz, 1H), 0.86 (s, 9H), 0.85 (s, 9H), 0.06 (s, 3H), 0.04 (s, 3H), 0.03 (s, 3H), 0.01 (s, 3H); <sup>13</sup>C NMR (150 MHz, CDCl<sub>3</sub>) δ 194.5, 171.8, 156.4, 155.5, 143.8, 136.1, 130.1(2C), 130.0, 129.0, 128.5, 128.4(2C), 128.0, 127.9(2C), 126.4, 116.9, 92.8, 89.7, 76.5, 71.1, 66.8, 66.3, 62.8, 62.4, 60.2, 54.7, 52.1, 37.2, 25.78(3C), 25.76(3C), 18.28, 18.23, -5.4, -5.3, -5.4, -5.2; CIHRMS Calcd for [C<sub>42</sub>H<sub>61</sub>NO<sub>11</sub>Si<sub>2</sub>Na<sup>+</sup>]: 834.3675. Found 834.3638.

**(1'S,4'S,5'R,1S,4S,5R)-1-[ *N*-carbobenzyloxy-D-tyrosine methoxycarbonyl -5'-(*tert*-butyl-dimethylsilanyloxymethyl)-1',4'-dihydro-5'H-pyran-4'-yloxy]-5-(*tert*-butyl-dimethylsilanyloxymethyl)-1,4-dihydro-5H-pyran-4-ol (10) :**

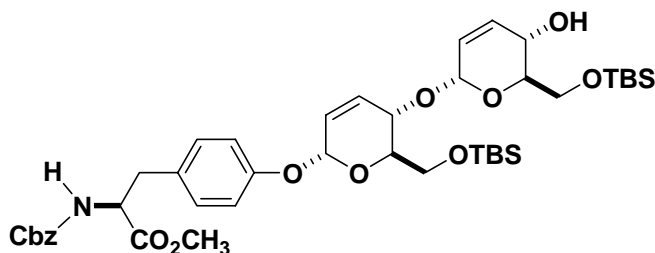

The enone compound **4** (200 mg, 0.246 mmol) was dissolved in 0.3 mL of CH<sub>2</sub>Cl<sub>2</sub> and 0.3 mL MeOH were added to a round bottom flask and cooled to -78 °C then (9 mg, 0.246 mmol) NaBH<sub>4</sub> was added and the reaction mixture was stirred at -78°C for 6 hours and on completion, as monitored by TLC, reaction mixture is diluted with ether and was quenched with 5 mL of satd aq NaHCO<sub>3</sub>, extracted (3 x 5 mL) with Et<sub>2</sub>O, dried (Na<sub>2</sub>SO<sub>4</sub>), and concentrated under reduced pressure. The crude product was purified using silica gel flash chromatography eluting with 20% EtOAc/hexanes to give enol **10** (182 mg, 0.223 mmol, 91%) as viscous oil. *R<sub>f</sub>* (40% EtOAc/hexanes) = 0.44; [α]<sub>D</sub><sup>26</sup> = + 49 (*c* = 1, CH<sub>2</sub>Cl<sub>2</sub>); IR (thin film, cm<sup>-1</sup>) 3420, 2930, 2855, 1725, 1717, 1510, 1256, 1219, 1151, 995, 836; <sup>1</sup>H NMR (600 MHz, CDCl<sub>3</sub>) δ 7.35 (m, 5H), 7.05 (m, 4H), 6.15 (d, *J* = 10.2 Hz, 1H), 5.96 (d, *J* = 10.2 Hz, 1H), 5.92 (dq, *J* = 10.2, 1.2 Hz, 1H), 5.68 (dd, *J* = 10.2, 2.4 Hz, 1H), 5.59 (d, *J* = 1.8 Hz, 1H), 5.25 (d, *J* = 7.8 Hz, 1H), 5.18 (d, *J* = 1.8 Hz, 1H), 5.10 (d, *J* = 12.6 Hz, 1H), 5.08 (d, *J* = 12.6 Hz, 1H), 4.62 (dd, *J* = 13.2, 5.4 Hz, 1H), 4.37 (d, *J* = 9.0 Hz, 1H), 4.24 (d, *J* = 8.4 Hz, 1H), 3.97 (dd, *J* = 9.6, 4.2 Hz, 1H), 3.89 (ddd, *J* = 10.2, 5.4, 2.4 Hz, 1H), 3.85 (dd, *J* = 10.2, 1.8 Hz, 1H), 3.81 (dd, *J* = 12.0, 5.4 Hz, 1H), 3.75 (dd, *J* = 10.2, 7.2 Hz, 1H), 3.70 (s, 3H), 3.71 (m, 1H), 3.08 (d, *J* = 3.0 Hz, 1H), 3.05 (dd, *J* = 8.4, 6.0 Hz, 1H), 3.02 (d, *J* = 6.0 Hz, 1H), 0.91 (s, 9H), 0.84 (s, 9H), 0.12 (s, 3H), 0.11 (s, 3H), 0.03 (s, 3H), 0.02 (s, 3H); <sup>13</sup>C NMR (150 MHz, CDCl<sub>3</sub>) δ 174.7, 171.8, 156.5, 155.5, 136.1, 133.1, 130.5, 130.0(2C), 128.4(2C), 128.0, 127.9(2C), 126.0, 125.3, 117.1(2C), 92.7, 91.0, 71.3, 70.1, 66.8, 66.6, 66.5, 65.1, 62.6, 54.8, 52.1, 37.2, 25.8(3C), 25.7(3C), 18.3, 18.1, -5.1, -5.2, -5.5, -5.6; CIHRMS Calcd for [C<sub>42</sub>H<sub>63</sub>NO<sub>11</sub>Si<sub>2</sub>Na<sup>+</sup>]: 836.3831. Found 836.3818.

**(1'S,4'S,5'R,1S,4S,5R)-1-[1'- *N*-carbobenzyloxy-D-tyrosine methoxycarbonyl -5'-(*tert*-butyl-dimethylsilanyloxymethyl)-1',4'-dihydro-5'H-pyran-4'-yloxy] -5-(*tert*-butyl-dimethylsilanyloxymethyl)-1,4-dihydro-5H-pyran-*O*-4'-isovaleric ester (**11**):**

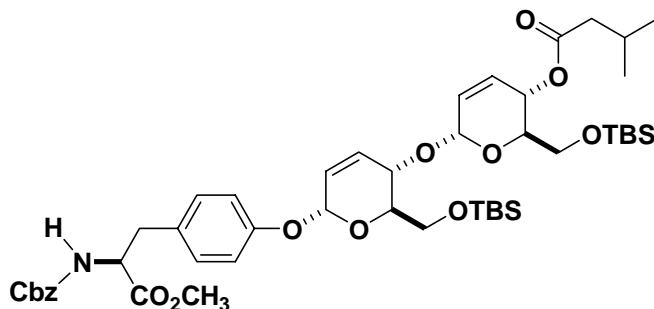

The alcohol compound **10** (140 mg, 0.171 mmol), isovaleric acid (21 mg, 0.206 mmol) and DCC (42 mg, 0.206 mmol) were dissolved in 0.3 mL of CH<sub>2</sub>Cl<sub>2</sub> in a round bottom flask and cooled to 0 °C then DMAP (2 mg, 0.01 mmol) was added and the reaction mixture was stirred at 0 °C for 6 hours and on completion, as monitored by TLC, the reaction mixture was diluted with ether and was quenched with 5 mL of satd. aq. NaHCO<sub>3</sub>, extracted (3 x 5 mL) with Et<sub>2</sub>O, dried (Na<sub>2</sub>SO<sub>4</sub>), and concentrated under reduced pressure. The crude product was purified using silica gel flash chromatography eluting with 15% EtOAc/hexanes to give **11** (148 mg, 0.164 mmol, 96%) as viscous oil.  $R_f$  (30% EtOAc/hexanes) = 0.62;  $[\alpha]_D^{26} = +90$  ( $c = 1$ , CH<sub>2</sub>Cl<sub>2</sub>); IR (thin film, cm<sup>-1</sup>) 2956, 2928, 1738, 1733, 1510, 1253, 1219, 1123, 986, 835; <sup>1</sup>H NMR (600 MHz, CDCl<sub>3</sub>)  $\delta$  7.34 (m, 5H), 7.00 (m, 4H), 6.20 (dd,  $J = 10.2, 2.4$  Hz, 1H), 5.93 (m, 2H), 5.74 (dd,  $J = 10.2, 1.8$  Hz, 1H), 5.59 (d,  $J = 1.2$  Hz, 1H), 5.42 (dd,  $J = 10.2, 1.8$  Hz, 1H), 5.28 (d,  $J = 1.2$  Hz, 1H), 5.24 (d,  $J = 8.4$  Hz, 1H), 5.10 (d,  $J = 12.6$  Hz, 1H), 5.08 (d,  $J = 12.6$  Hz, 1H), 4.62 (dd,  $J = 13.2, 5.4$  Hz, 1H), 4.42 (d,  $J = 9.0$  Hz, 1H), 3.89 (ddd,  $J = 10.2, 5.4, 2.4$  Hz, 1H), 3.85 (dd,  $J = 10.2, 1.8$  Hz, 1H), 3.81 (dd,  $J = 11.4, 5.4$  Hz, 1H), 3.78 (dd,  $J = 10.2, 1.8$  Hz, 1H), 3.75 (m, 1H), 3.70 (s, 3H), 3.71 (m, 1H), 3.08 (dd,  $J = 13.8, 5.4$  Hz, 1H), 3.04 (dd,  $J = 13.8, 6.0$  Hz, 1H), 2.20 (d,  $J = 1.2$  Hz, 2H), 2.10 (m, 1H), 0.96 (d,  $J = 6.6$  Hz, 6H), 0.89 (s, 9H), 0.85 (s, 9H), 0.05 (s, 6H), 0.03 (s, 3H), 0.02 (s, 3H); <sup>13</sup>C NMR (150 MHz, CDCl<sub>3</sub>)  $\delta$  172.1, 171.8, 156.6, 155.5, 136.2, 130.3, 130.0(2C), 129.8, 128.4(2C), 128.0(2C), 127.9, 127.2, 126.1, 117.2(2C), 92.9, 90.9, 71.4, 69.6, 66.8, 66.3, 64.6, 62.8, 62.1, 54.7, 52.1, 43.3, 37.2, 25.9,

25.8(6C), 25.6, 22.3, 22.2 18.38, 18.36, -5.1, -5.2, -5.41, -5.45; CIHRMS Calcd for  $[C_{47}H_{71}NO_{12}Si_2Na^+]$ : 920.4407. Found 920.4385.

**1'-N-carbobenzyloxy-D-tyrosine methoxycarbonyl -5',5-(tert-butyl-dimethylsilyloxymethyl)-di-1,4- $\alpha$ -D-mannose -O-4' isovaleric ester (3a):**

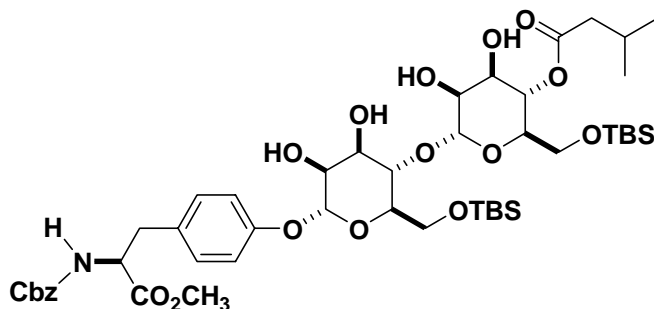

To a *t*-butanol-acetone (0.2 mL, 1:1) solution of diene ester **11** (100 mg, 0.11 mmol) at 0 °C was added a solution of (50% w/v) of *N*-methyl morpholine *N*-oxide / water (0.1 mL). Crystalline OsO<sub>4</sub> (1.4 mg, 5 mol %) was added and the reaction was stirred for 12 h. The reaction mixture was concentrated and was pipetted directly on to a silica gel column using CH<sub>2</sub>Cl<sub>2</sub> (1 mL) in three portions. Impurities were eluted with ether and the product was eluted with MeOH/ether (2:98 to 4:96). Pure fractions were combined and concentrated to afford bis- $\alpha$ -D-manno-tetrol **3a** (91 mg, 0.094 mmol, 85 %) as viscous oil.  $R_f$  (90% EtOAc/MeOH) = 0.56;  $[\alpha]_D^{26} = +61.9$  ( $c = 2$ , CH<sub>2</sub>Cl<sub>2</sub>); IR (thin film, cm<sup>-1</sup>) 2956, 2928, 1738, 1733, 1510, 1253, 1219, 1123, 986, 835; <sup>1</sup>H NMR (600 MHz, CDCl<sub>3</sub>)  $\delta$  7.31 (m, 5H), 6.99 (m, 4H), 5.45 (d,  $J = 1.2$  Hz, 1H), 5.36 (d,  $J = 1.8$  Hz, 1H), 5.26 (d,  $J = 8.4$  Hz, 1H), 5.10 (d,  $J = 12.6$  Hz, 1H), 5.07 (d,  $J = 12.6$  Hz, 1H), 5.02 (dd,  $J = 10.2, 9.0$  Hz, 1H), 4.62 (dd,  $J = 6.0, 1.8$  Hz, 1H), 4.22 (ddd,  $J = 10.2, 6.0, 3.6$ , Hz, 1H), 4.13 (dd,  $J = 10.2, 6.6$  Hz, 1H), 4.03 (dd,  $J = 4.2, 1.8$  Hz, 1H), 3.97 (ddd,  $J = 10.8, 7.2, 2.4$  Hz, 1H), 3.93 (dd,  $J = 10.2, 4.2$  Hz, 1H), 3.89 (dd,  $J = 10.2, 9.6$  Hz, 1H), 3.86 (dd,  $J = 11.4, 10.2$  Hz, 1H), 3.78 (dd,  $J = 10.2, 4.8$  Hz, 1H), 3.72 (dd,  $J = 10.2, 4.8$  Hz, 1H), 3.70 (s, 3H), 3.70 (m, 2H), 3.45 (d,  $J = 3.6$  Hz, 1H), 3.25 (d,  $J = 7.2$  Hz, 1H), 3.10 (d,  $J = 1.2$  Hz, 1H), 3.06 (dd,  $J = 13.8, 6.0$  Hz, 1H), 3.02 (dd,  $J = 15.0, 5.4$  Hz, 1H), 2.24 (dd,  $J = 15.0, 7.2$  Hz, 1H), 2.20 (dd,  $J = 13.8, 7.2$  Hz, 1H), 2.16 (d,  $J = 1.8$  Hz, 1H), 2.08 (m, 1H), 0.96 (d,  $J = 6.6$  Hz, 6H), 0.89 (s, 9H), 0.84 (s, 9H), 0.07 (s, 3H), 0.06 (s, 3H), 0.02 (s, 3H), 0.02 (s, 3H); <sup>13</sup>C NMR (150 MHz, CDCl<sub>3</sub>)  $\delta$  173.5, 171.9, 155.6, 155.4, 136.1, 130.2(2C), 128.4(3C), 128.1(2C), 128.0, 116.8(2C), 98.3, 97.7, 73.7, 71.6, 71.2, 70.8, 70.1, 70.0, 69.8, 66.9, 62.8, 54.8,



52.2, 43.4(2C), 37.2, 25.9, 25.9(3C), 25.8(3C), 25.7, 22.3, 22.2, 18.4, 18.3, -5.2, -5.3, -5.40, -5.47; CIHRMS Calcd for  $[C_{47}H_{75}NO_{16}Si_2Na^+]$ : 988.4516. Found 988.4459.

**1'-*N*-carbobenzyloxy-D-tyrosine methoxycarbonyl -5',5-(*tert*-butyl-dimethylsilanyloxymethyl)-2,3,2',3'-di acetonide-bis-1,4- $\alpha$ -D-mannose-*O*-4'-isovaleric ester (**3b**) :**

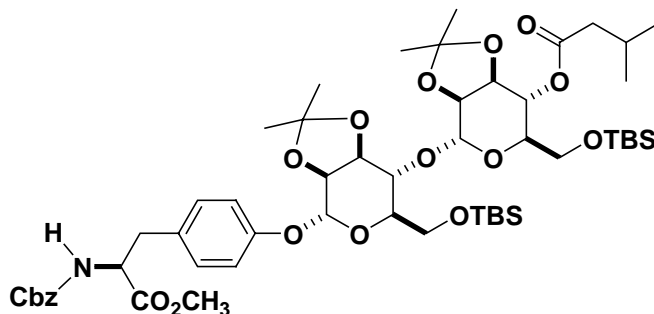

To a  $CH_2Cl_2$  (0.1 mL, 1.0M) solution of *D*-manno-tetrol **3a** (20 mg, 0.02 mmol) and 2,2-dimethoxypropane (4.6 mg, 0.04 mmol) at 0 °C was added CSA (0.50 mg, 10 mol%) and the reaction was stirred for 6 h. The reaction mixture was concentrated and was pipetted directly on to a silica gel column using  $CH_2Cl_2$  (1 mL) in three portions. Impurities were eluted with ether and the product was eluted with EtOAc/Hexane (40:60). Pure fractions were combined and concentrated to afford **3b** (17 mg, 0.02 mmol, 80 %) as viscous oil.  $R_f$  (50% EtOAc/Hexane) = 0.45;  $[\alpha]_D^{26} = +49$  ( $c$  1,  $CH_2Cl_2$ ); IR (thin film,  $cm^{-1}$ ) 2955, 2935, 1728, 1511, 1226, 1101, 1017, 833;  $^1H$  NMR (600 MHz,  $CDCl_3$ )  $\delta$  7.35 (m, 5H), 7.29 (m, 4H), 5.97 (d,  $J = 10.2$  Hz, 1H), 5.92 (ddd,  $J = 10.2, 3.0, 1.8$  Hz, 1H), 5.40 (br s, 1H), 5.04 (br s, 2H), 4.94 (dd,  $J = 9.6, 7.8$  Hz, 1H), 4.79 (d,  $J = 12.0$  Hz, 1H), 4.56 (d,  $J = 12.0$  Hz, 1H), 4.38 (ddd,  $J = 9.0, 4.2, 4.2$  Hz, 1H), 4.26 (d,  $J = 6.0$  Hz, 1H), 4.21 (dd,  $J = 13.2, 5.4$  Hz, 1H), 4.09 (dd,  $J = 11.4, 5.4$  Hz, 1H), 4.01 (m, 1H), 3.78 (d,  $J = 5.4$  Hz, 1H), 3.74 (dd,  $J = 10.2, 2.4$  Hz, 1H), 3.72 (br s, 1H), 3.68 (d,  $J = 6.0$  Hz, 1H), 3.67 (s, 3H), 3.61 (d,  $J = 10.2$  Hz, 1H), 3.06 (dd,  $J = 7.2, 6.0$  Hz, 1H), 2.95 (s, 1H), 2.88 (s, 1H), 2.26 (dd,  $J = 15.0, 6.6$  Hz, 1H), 2.18 (dd,  $J = 15.0, 7.2$  Hz, 1H), 1.93 (m, 3H), 1.85 (m, 3H), 1.63 (m, 3H), 1.50 (m, 3H), 0.97 (s, 6H), 0.95 (s, 9H), 0.90 (s, 9H), 0.10 (s, 3H), 0.09 (s, 6H), 0.06 (s, 3H);  $^{13}C$  NMR (150 MHz,  $CDCl_3$ )  $\delta$  173.2, 172.6, 154.2, 137.5, 130.3, 128.7, 128.6(2C), 128.5, 128.4(2C), 128.1, 128.0(2C), 127.8, 116.7, 110.0, 92.9(2C), 75.1, 69.9(3C), 69.5(2C), 66.6, 62.8(2C), 58.8(2C), 53.2, 50.4, 40.1, 38.1, 29.3, 28.7(2C), 28.4, 26.0(3C), 25.9(3C), 22.3(2C), 18.6, 18.3(2C), -5.0, -5.2(2C), -5.3; CIHRMS Calcd for  $[C_{53}H_{83}NO_{16}Si_2Na^+ - C_3H_6^{2+}]$ : 1028.5142. Found 1028.4585.

**1'-N-carbobenzyloxy-D-tyrosine methoxycarbonyl -5',5-(hydroxy methyl)-di-1,4- $\alpha$ -D-mannose -O-4' isovaleric ester (2a):**

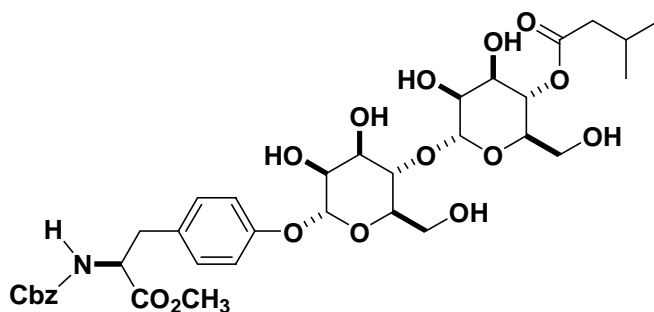

To a THF (0.5 mL, 0.1M) solution of *D-manno*-tetrol **3a** (50 mg, 0.05 mmol) at 0 °C was added a solution of TBAF in THF (50  $\mu$ L, 1.0M) and the reaction was stirred for 1 h. The reaction mixture was concentrated and was pipetted directly on to a silica gel column using CH<sub>2</sub>Cl<sub>2</sub> (1 mL) in three portions. Impurities were eluted with ether and the product was eluted with MeOH/EtOAc/Hexane (10:40:50). Pure fractions were combined and concentrated to afford **2a** (31 mg, 0.04 mmol, 80 %) as viscous oil.  $R_f$  (10:50:40% MeOH/EtOAc/Hexane) = 0.20;  $[\alpha]_D^{26} = +71$  ( $c$  0.5, CH<sub>3</sub>OH); IR (thin film, cm<sup>-1</sup>) 3337, 2956, 2926, 1738, 1611, 1510, 1228, 1217, 1094, 976, 834; <sup>1</sup>H NMR (600 MHz, CDCl<sub>3</sub>)  $\delta$  7.36 (m, 5H), 7.17 (m, 4H), 5.48 (d,  $J$  = 1.8 Hz, 1H), 5.42 (d,  $J$  = 1.8 Hz, 1H), 5.09 (br s, 2H), 4.59 (br s, 1H), 4.45 (ddd,  $J$  = 7.8, 6.6, 1.8 Hz, 1H), 4.08 (dd,  $J$  = 10.2, 1.8 Hz, 1H), 4.05 (m, 3H), 4.00 (br s, 1H), 3.89 (dd,  $J$  = 9.6, 2.4 Hz, 1H), 3.80 (dd,  $J$  = 10.2, 2.4 Hz, 1H), 3.74 (m, 4H), 3.68 (m, 1H), 3.62 (m, 1H), 3.36 (m, 3H), 3.15 (ddd,  $J$  = 10.2, 4.8, 4.8 Hz, 1H), 2.93 (m, 2H), 2.29 (m, 1H), 2.13 (m, 1H), 1.34 (m, 1H), 1.03 (d,  $J$  = 6.6 Hz, 6H); NMR (150 MHz, CDCl<sub>3</sub>)  $\delta$  172.1, 155.8, 155.3, 136.4, 130.5(2C), 129.9, 128.4(2C), 128.2(2C), 116.6, 103.2, 102.4, 98.1, 71.8, 71.3, 67.1(2C), 61.1, 55.1, 52.5(2C), 43.6, 43.1, 37.5, 36.6, 31.6, 30.5, 29.8, 28.6, 25.9, 23.1, 22.5(2C); CIHRMS Calcd for [C<sub>35</sub>H<sub>47</sub>NO<sub>16</sub>Na<sup>+</sup>]: 760.2787. Found 760.2798.

**(1'S,4'S,5'R,1S,4S,5R)-1-[1'-N-carbobenzyloxy-D-tyrosine methoxycarbonyl -5'-(*tert*-butyl-dimethylsilanyloxymethyl)-tetrahydro-pyran-4'-yloxy]-5-(*tert*-butyl-dimethylsilanyloxymethyl)-tetrahydro-pyran-*O*-4'-isovaleric ester (**16**):**

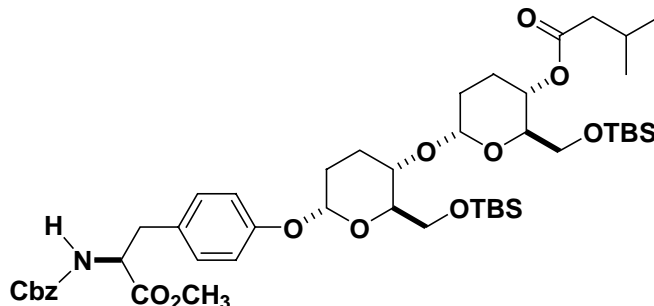

The dienone ester compound **11** (27 mg, 0.03 mmol) and *o*-NO<sub>2</sub>C<sub>6</sub>H<sub>4</sub>SO<sub>2</sub>NHNH<sub>2</sub> (20 mg, 0.02 mmol) were dissolved in 0.2 mL of CH<sub>2</sub>Cl<sub>2</sub> in a round bottom flask and cooled 0 °C under nitrogen atmosphere then triethylamine (17 mg, 0.17 mmol) was added and the reaction mixture was stirred at 0 °C for 12 hours and on completion, as monitored by TLC. The reaction mixture was concentrated and was pipetted directly on to a silica gel column using CH<sub>2</sub>Cl<sub>2</sub> (1 mL) in three portions. The crude product was purified using silica gel flash chromatography eluting with 15% EtOAc/hexanes to give **16** (18 mg, 0.02 mmol, 95 %) as viscous oil. *R<sub>f</sub>* (30% EtOAc/Hexane) = 0.46; [α]<sub>D</sub><sup>26</sup> = + 35 (*c* 1, CH<sub>2</sub>Cl<sub>2</sub>); IR (thin film, cm<sup>-1</sup>) 2952, 2929, 1735, 1510, 1254, 1220, 1123, 996, 836; <sup>1</sup>H NMR (600 MHz, CDCl<sub>3</sub>) δ 7.34 (m, 5H), 6.98 (m, 4H), 5.45 (br s, 1H), 5.24 (d, *J* = 7.8 Hz, 1H), 5.09 (br s, 2H), 5.08 (d, *J* = 2.4 Hz, 1H), 4.73 (ddd, *J* = 10.2, 9.6, 4.8 Hz, 1H), 4.60 (ddd, *J* = 7.8, 5.4, 5.4 Hz, 1H), 3.84 (d, *J* = 11.4 Hz, 1H), 3.79-3.67 (m, 6H), 3.70 (s, 3H), 3.05 (dd, *J* = 13.2, 6.0 Hz, 1H), 3.01 (dd, *J* = 13.2, 5.4 Hz, 1H), 2.15 (m, 3H), 2.06 (m, 1H), 2.00 (m, 2H), 1.80 (m, 3H), 1.71 (m, 2H), 0.89 (d, *J* = 6.6 Hz, 6H), 0.86 (s, 9H), 0.84 (s, 9H), 0.03 (s, 6H), 0.01 (s, 6H); <sup>13</sup>C NMR (67.5 MHz, CDCl<sub>3</sub>) δ 172.0, 172.2, 156.4, 136.5, 130.2, 128.4(2C), 128.2(2C), 128.1, 128.0(2C), 116.7(2C), 94.8, 90.5, 75.1, 73.4, 71.5, 67.7, 66.8, 66.4, 63.1, 62.6, 54.6, 52.0, 43.6, 37.5,

28.6, 25.8(3C), 25.7(3C), 25.7, 23.6, 22.2(3C), 22.0, 18.4, 18.2, -5.1, -5.3, -5.40, -5.44; CIHRMS Calcd for  $[C_{47}H_{75}NO_{12}Si_2Na^+]$ : 924.4720. Found 924.4702.

**3-{4-[6-(*tert*-Butyl-dimethylsilanyloxymethyl)-5-oxo-5,6-dihydro-2*H*-pyran-2-yloxy]-phenyl}-2-*N*-carbobenzyloxy-D-tyrosine methyl ester (A- structure was not shown in Scheme 6):**

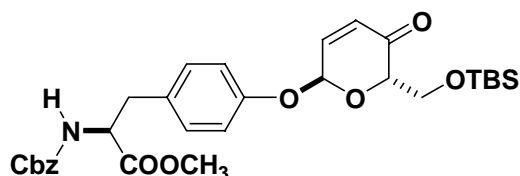

A  $CH_2Cl_2$  (0.6 mL) solution of compound (*ent*)-**6** (200 mg, 0.55 mmol) and Cbz-D-tyrosine methyl ester **5** (220 mg, 0.67 mmol) was cooled to 0 °C. A  $CH_2Cl_2$  (0.6 mL) solution of  $Pd_2(dba)_3 \cdot CHCl_3$  (14 mg, 2.5 mol%) and  $PPh_3$  (14 mg, 10 mol%) was added to the reaction mixture at 0 °C. The reaction mixture was stirred at 0 °C for 3 hours. The reaction mixture was quenched with 5 mL of satd. aq.  $NaHCO_3$ , extracted (3 x 5 mL) with  $Et_2O$ , dried over  $Na_2SO_4$ , and concentrated under reduced pressure. The crude product was purified using silica gel flash chromatography eluting with 20%  $EtOAc$ /hexanes to give **12a** (278 mg, 0.50 mmol, 90%) as viscous oil.  $R_f$  (40%  $EtOAc$ /hexanes) = 0.40;  $[\alpha]_D^{26} = (c\ 0.64, CH_2Cl_2)$ ; IR (thin film,  $cm^{-1}$ ) 3351, 2952, 1752, 1725, 1509, 1256, 1219, 1151, 995, 836;  $^1H$  NMR (270 MHz,  $CDCl_3$ )  $\delta$  7.35 (m, 5H), 7.05 (m, 4H), 6.97 (dd,  $J = 10.2, 3.5$  Hz, 1H), 6.22 (d,  $J = 10.2$  Hz, 1H), 5.94 (d,  $J = 3.3$  Hz, 1H), 5.33 (dd,  $J = 8.5, 4.2$  Hz, 1H), 5.09 (br s, 2H), 4.62 (dd,  $J = 13.2, 5.7$  Hz, 1H), 4.53 (dd,  $J = 4.1, 3.1$  Hz, 1H), 4.15-4.00 (m, 2H), 3.71 (s, 3H), 3.69 (m, 2H), 0.84 (s, 9H), 0.05 (s, 3H), 0.04 (s, 3H);  $^{13}C$  NMR (67.5 MHz,  $CDCl_3$ )  $\delta$  194.2, 177.7, 156.1, 155.4, 151.6, 150.0, 142.6, 136.0, 133.1, 130.2, 130.0, 128.5, 128.3, 128.0, 127.9, 121.2, 116.9, 91.8, 83.3, 66.8, 62.4, 54.7, 52.2, 37.1, 25.1(3C), 18.1, -5.46, -5.49; CIHRMS Calcd for  $[C_{30}H_{39}NO_8SiNa^+]$ : 592.2343. Found 592.2369.

**3-{4-[6-(*tert*-Butyl-dimethylsilyloxy)methyl]-5-hydroxy-5,6-dihydro-2*H*-pyran-2-yloxy]-phenyl}-2- *N*-carbobenzyloxy-*D*-tyrosine methyl ester (**B**- structure was not shown in Scheme 6):**

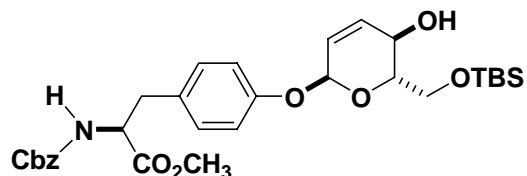

The enone compound **12a** (300 mg, 0.527 mmol), dissolved in 0.5 mL of CH<sub>2</sub>Cl<sub>2</sub> and 0.5 mL MeOH, was added to a round bottom flask and cooled to -24 °C then (20 mg, 0.527 mmol) NaBH<sub>4</sub> was added and the reaction mixture was stirred at -24 °C for 1 hour and on completion, as monitored by TLC, the reaction mixture was diluted with ether and was quenched with 5 mL of satd. aq. NaHCO<sub>3</sub>, extracted (3 x 5 mL) with Et<sub>2</sub>O, dried over Na<sub>2</sub>SO<sub>4</sub>, and concentrated under reduced pressure. The crude product was purified using silica gel flash chromatography eluting with 25% EtOAc/hexanes to give **12b** (270 mg, 0.47 mmol, 89%) as viscous oil. *R<sub>f</sub>* (30% EtOAc/hexanes) = 0.30; [α]<sub>D</sub><sup>26</sup> = - 82 (*c* 1, CH<sub>2</sub>Cl<sub>2</sub>); IR (thin film, cm<sup>-1</sup>) 3357, 2928, 1722, 1611, 1439, 1225, 1054, 985, 835; <sup>1</sup>H NMR (600 MHz, CDCl<sub>3</sub>) δ 7.33 (m, 5H), 6.97 (m, 4H), 6.07 (dd, *J* = 10.2, 1.2 Hz, 1H), 5.85 (ddd, *J* = 10.2, 2.4, 2.4 Hz, 1H), 5.56 (dd, *J* = 2.4, 1.2 Hz, 1H), 5.20 (d, *J* = 7.8 Hz, 1H), 5.09 (d, *J* = 12.0 Hz, 1H), 5.07 (d, *J* = 12.0 Hz, 1H), 4.61 (dd, *J* = 13.2, 5.4 Hz, 1H), 4.26 (dd, *J* = 9.0, 1.8 Hz, 1H), 3.89 (dd, *J* = 10.2, 4.8 Hz, 1H), 3.83 (ddd, *J* = 9.0, 7.2, 4.8 Hz, 1H), 3.73 (dd, *J* = 9.6, 6.6 Hz, 1H), 3.31 (s, 3H), 3.08 (dd, *J* = 13.8, 5.4 Hz, 1H), 3.04 (dd, *J* = 13.8, 5.4 Hz, 1H), 3.01 (d, *J* = 3.0 Hz, 1H), 0.87 (s, 9H), 0.07 (s, 3H), 0.05 (s, 3H); <sup>13</sup>C NMR (150 MHz, CDCl<sub>3</sub>) δ 171.9, 156.6, 136.2, 133.3, 130.2, 130.2(2C), 128.5(2C), 128.1, 128.0, 124.8, 116.9(2C), 116.6, 92.8, 70.7, 66.9, 66.8, 65.3, 54.8, 52.3, 52.2, 37.3, 25.7(3C), 18.1, -5.5, -5.6; CIHRMS Calcd for [C<sub>30</sub>H<sub>41</sub>NO<sub>8</sub>SiNa<sup>+</sup>]: 594.2493 Found 594.2500.

**(1'*R*, 4'*R*, 5'*S*, 1*R*, 5*S*)-1-[1'-*N*-carbobenzyloxy-*D*-tyrosine methoxycarbonyl -5-(*tert*-butyl-dimethylsilyloxy)methyl)-1',4'-dihydro-5'*H*-pyran-4'-yloxy]-5-(*tert*-butyl-dimethylsilyloxy)methyl)-1*H*-pyran-4-one (**12**):**

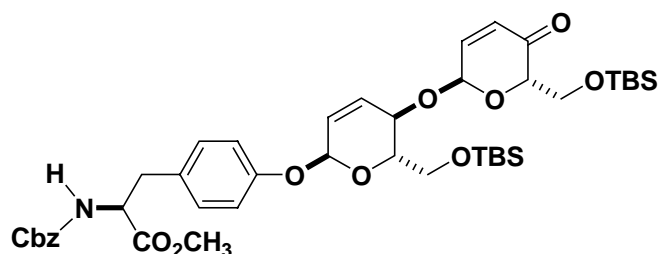

A CH<sub>2</sub>Cl<sub>2</sub> (0.5 mL) solution of compound (*ent*)-**6** (163 mg, 0.45 mmol) and alcohol **12b** (260 mg, 0.45 mmol) was cooled to 0 °C. A CH<sub>2</sub>Cl<sub>2</sub> (0.5 mL) solution of Pd<sub>2</sub>(dba)<sub>3</sub>.CHCl<sub>3</sub> (11.8 mg, 2.5 mol%) and PPh<sub>3</sub> (12 mg, 10 mol%) was added to the reaction mixture at 0 °C. The reaction mixture was stirred at 0 °C for 2 hours. The reaction mixture was quenched with 5 mL of satd. aq. NaHCO<sub>3</sub>, extracted (3 x 5 mL) with Et<sub>2</sub>O, dried over Na<sub>2</sub>SO<sub>4</sub>, and concentrated under reduced pressure. The crude product was purified using silica gel flash chromatography eluting with 16% EtOAc/hexanes to give dienone **12** (313 mg, 0.38 mmol, 85%) as viscous oil.  $R_f$  (30% EtOAc/hexanes) = 0.44;  $[\alpha]_D^{26} = -63$  (*c* 1, CH<sub>2</sub>Cl<sub>2</sub>); IR (thin film, cm<sup>-1</sup>) 3341, 2952, 1725, 1700, 1509, 1252, 1226, 1123, 984, 836; <sup>1</sup>H NMR (600 MHz, CDCl<sub>3</sub>)  $\delta$  7.34 (m, 5H), 7.00 (m, 4H), 6.84 (dd, *J* = 10.2, 3.6 Hz, 1H), 6.23 (d, *J* = 10.2 Hz, 1H), 6.14 (d, *J* = 10.8 Hz, 1H), 5.95 (ddd, *J* = 10.2, 3.0, 1.2 Hz, 1H), 5.62 (d, *J* = 3.6 Hz, 1H), 5.61 (d, *J* = 1.8 Hz, 1H), 5.18 (d, *J* = 7.8 Hz, 1H), 5.10 (br s, 2H), 4.62 (dd, *J* = 13.8, 6.0 Hz, 1H), 4.59 (d, *J* = 9.0 Hz, 1H), 4.44 (dd, *J* = 3.6, 2.4 Hz, 1H), 4.13 (d, *J* = 3.6 Hz, 1H), 4.10 (dd, *J* = 10.2, 4.2 Hz, 1H), 3.96 (dd, *J* = 10.2, 2.4 Hz, 1H), 3.86 (dq, *J* = 12.0, 3.6 Hz, 1H), 3.80 (dd, *J* = 12.0, 4.2 Hz, 1H), 3.72 (s, 3H), 3.07 (dd, *J* = 13.8, 5.4 Hz, 1H), 3.03 (dd, *J* = 13.8, 6.0 Hz, 1H), 0.86 (s, 9H), 0.84 (s, 9H), 0.06 (s, 3H), 0.04 (s, 3H), 0.02 (s, 3H), 0.01 (s, 3H); <sup>13</sup>C NMR (150 MHz, CDCl<sub>3</sub>)  $\delta$  194.6, 171.9, 156.4, 155.6, 143.9, 136.2, 133.3, 130.2(2C), 130.1, 129.1, 128.6, 128.5(2C), 128.1, 128.0, 126.6(2C), 117.0, 92.9, 89.8, 76.7, 71.3, 66.9, 66.5, 62.9, 62.5, 54.8, 52.2, 37.3, 25.9(3C), 25.8(3C), 18.4, 18.3, -5.1, -5.3(2C), -5.4; CIHRMS Calcd for [C<sub>42</sub>H<sub>61</sub>NO<sub>11</sub>Si<sub>2</sub>Na<sup>+</sup>]: 834.3675. Found 834.3648.

**(1'R,4'R,5'S,1R,4R,5S)-1-[N-carbobenzyloxy-D-tyrosine methoxycarbonyl -5'-(tert-butyl-dimethylsilanyloxymethyl)-1',4'-dihydro-5'H-pyran-4'-yloxy]-5-(tert-butyl-dimethylsilanyloxymethyl)-1,4-dihydro-5H-pyran-4-ol (13a):**

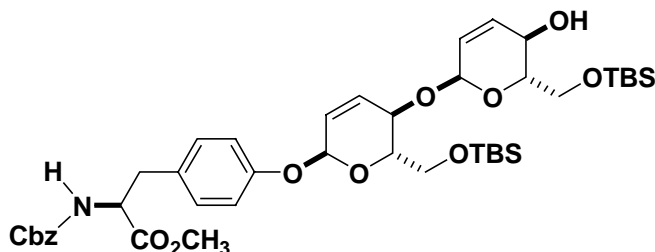

The dienone compound **12** (300 mg, 0.37 mmol), dissolved in 0.4 mL of CH<sub>2</sub>Cl<sub>2</sub> and 0.4 mL MeOH, was added to a round bottom flask and cooled to -24 °C then NaBH<sub>4</sub> (14 mg, 0.37 mmol) was added and the reaction mixture was stirred at -24 °C for 1 hour and on completion, as monitored by TLC, the reaction mixture is diluted with ether and was quenched with 5 mL of satd. aq. NaHCO<sub>3</sub>, extracted (3 x 5 mL) with Et<sub>2</sub>O, dried over Na<sub>2</sub>SO<sub>4</sub>, and concentrated under reduced pressure. The crude product was purified using silica gel flash chromatography eluting with 25% EtOAc/hexanes to give **13a** (271 mg, 0.333 mmol, 90%) as viscous oil.  $R_f$  (30% EtOAc/hexanes) = 0.30;  $[\alpha]_D^{26} = -72$  (*c* 1, CH<sub>2</sub>Cl<sub>2</sub>); IR (thin film, cm<sup>-1</sup>) 3433, 2928, 2857, 1724, 1509, 1253, 1226, 1123, 1044, 981, 836; <sup>1</sup>H NMR (600 MHz, CDCl<sub>3</sub>)  $\delta$  7.34 (m, 5H), 7.00 (m, 4H), 6.15 (d, *J* = 10.8 Hz, 1H), 5.97 (dd, *J* = 10.2, 1.8 Hz, 1H), 5.92 (ddd, *J* = 10.2, 3.0, 1.8 Hz, 1H), 5.68 (ddd, *J* = 10.2, 2.4, 1.8 Hz, 1H), 5.59 (d, *J* = 1.8 Hz, 1H), 5.18 (br s, 2H), 5.09 (br s, 2H), 4.61 (dd, *J* = 13.2, 5.4 Hz, 1H), 4.36 (d, *J* = 8.4 Hz, 1H), 4.24 (d, *J* = 8.4 Hz, 1H), 3.97 (dd, *J* = 9.6, 4.2 Hz, 1H), 3.89 (dddd, *J* = 5.4, 3.6, 1.8, 1.8 Hz, 1H), 3.85 (dd, *J* = 11.4, 2.4 Hz, 1H), 3.80 (dd, *J* = 11.4, 5.4 Hz, 1H), 3.73 (dd, *J* = 10.2, 1.8 Hz, 1H), 3.72 (s, 3H), 3.69 (m, 1H), 3.06 (d, *J* = 6.0 Hz, 1H), 3.05 (d, *J* = 5.4 Hz, 1H), 3.02 (d, *J* = 2.4 Hz, 1H), 0.92 (s, 9H), 0.84 (s, 9H), 0.12 (s, 3H), 0.11 (s, 3H), 0.02 (s, 3H), 0.01 (s, 3H); <sup>13</sup>C NMR (150 MHz, CDCl<sub>3</sub>)  $\delta$  171.9, 156.7, 155.6, 136.2, 133.1, 130.5, 130.1(2C), 130.0, 129.0, 128.4(2C), 128.1, 128.0, 126.1, 125.4, 117.2, 116.9, 92.8, 91.1, 71.4, 70.0, 66.9, 66.9, 66.7, 65.3, 62.6, 54.8, 52.2, 37.3, 25.8(3C), 25.8(3C), 18.3, 18.2, -5.0, -5.1, -5.4, -5.6; CIHRMS Calcd for [C<sub>42</sub>H<sub>63</sub>NO<sub>11</sub>Si<sub>2</sub>Na<sup>+</sup>]: 836.3831. Found 836.3844.

**(1'R,4'R,5'S,1R,4R,5S)-1-[1'- N-carbobenzyloxy-D-tyrosine methoxycarbonyl -5'-(*tert*-butyl-dimethylsilyloxy)methyl)-1',4'-dihydro-5'H-pyran-4'-yloxy] -5-(*tert*-butyl-dimethylsilyloxy)methyl)-1,4-dihydro-5H-pyran-*O*-4'-isovaleric ester (**13**):**

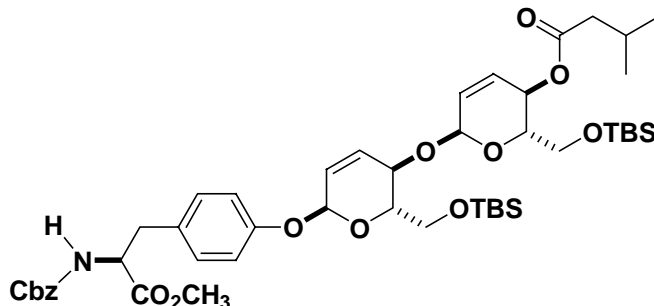

The alcohol compound **13a** (135 mg, 0.17 mmol), isovaleric acid (20 mg, 0.20 mmol) and DCC (41 mg, 0.20 mmol) were dissolved in 0.3 mL of CH<sub>2</sub>Cl<sub>2</sub> in a round bottom flask and cooled to 0 °C then DMAP (2 mg, 0.016 mmol) was added and the reaction mixture was stirred at 0 °C for 6 hours and on completion, as monitored by TLC, the reaction mixture was diluted with ether and was quenched with 5 mL of satd. aq. NaHCO<sub>3</sub>, extracted (3 x 5 mL) with Et<sub>2</sub>O, dried over Na<sub>2</sub>SO<sub>4</sub>, and concentrated under reduced pressure. The crude product was purified using silica gel flash chromatography eluting with 15% EtOAc/hexanes to give **13** (141.5mg, 0.16 mmol, 95%) as viscous oil.  $R_f$  (30% EtOAc/hexanes) = 0.60;  $[\alpha]_D^{26} = -99$  (*c* 1, CH<sub>2</sub>Cl<sub>2</sub>); IR (thin film, cm<sup>-1</sup>) 2956, 2929, 1737, 1509, 1253, 1219, 1123, 986, 835; <sup>1</sup>H NMR (600 MHz, CDCl<sub>3</sub>)  $\delta$  7.34 (m, 5H), 7.00 (m, 4H), 6.20 (d, *J* = 10.2 Hz, 1H), 5.94 (dd, *J* = 2.4, 1.8 Hz, 1H), 5.92 (dd, *J* = 2.4, 1.8 Hz, 1H), 5.76 (dd, *J* = 3.0, 1.8 Hz, 1H), 5.74 (ddd, *J* = 10.2, 2.4, 2.4 Hz, 1H), 5.59 (d, *J* = 1.8 Hz, 1H), 5.41 (dd, *J* = 10.2, 1.8 Hz, 1H), 5.28 (d, *J* = 1.8 Hz, 1H), 5.17 (d, *J* = 7.8 Hz, 1H) 5.10 (br s, 2H), 4.62 (dd, *J* = 13.2, 5.4 Hz, 1H), 4.41 (d, *J* = 9.0 Hz, 1H), 3.90 (dddd, *J* = 10.2, 5.4, 2.4, 2.4 Hz, 1H), 3.85 (dd, *J* = 11.4, 2.4 Hz, 1H), 3.80 (dd, *J* = 11.4, 5.4 Hz, 1H), 3.77 (dd, *J* = 6.0, 2.4 Hz, 1H), 3.75 (m, 1H), 3.72 (s, 3H), 3.06 (dd, *J* = 9.6, 4.2 Hz, 1H), 3.04 (dd, *J* = 9.6, 5.4 Hz, 1H), 2.20 (d, *J* = 1.8 Hz, 2H), 2.10 (m, 1H), 0.96 (d, *J* = 7.6 Hz, 6H), 0.89 (s, 9H), 0.84 (s, 9H), 0.05 (s, 6H), 0.02 (s, 3H), 0.01 (s, 3H); <sup>13</sup>C NMR (150 MHz, CDCl<sub>3</sub>)  $\delta$  172.2, 171.9, 156.7, 136.2, 130.4, 130.1(2C), 129.9, 128.5(2C),



128.1(2C), 128.0, 127.3, 126.2, 117.3, 117.2(2C), 92.9, 91.0, 71.5, 69.7, 66.9, 66.4, 64.7, 62.9, 62.2, 54.8, 52.2, 43.4, 37.3, 25.94(3C), 25.92(3C), 25.7, 22.4, 22.3, 20.2, 18.45(2C), -5.1, -5.2, -5.4, -5.3; CIHRMS Calcd for  $[C_{47}H_{71}NO_{12}Si_2Na^+]$ : 920.4407. Found 920.4401.

**1'-N-carbobenzyloxy-D-tyrosine methoxycarbonyl -5',5-(tert-butyl-dimethylsilyloxymethyl)-di-1,4- $\alpha$ -l-mannose-O-4'-isovaleric ester (14a):**

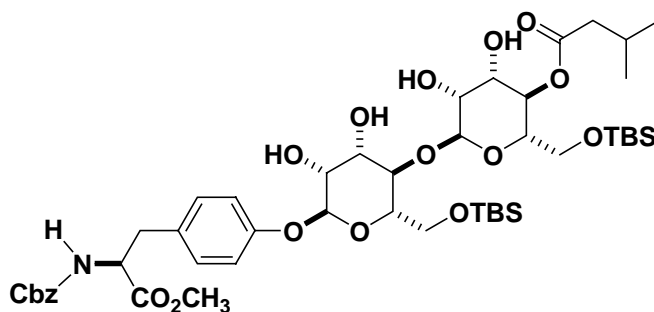

To a  $CH_2Cl_2$  (1.6 mL, 0.1M) solution of dienone **13** (148 mg, 0.16 mmol) at 0 °C was added a solution of (50% w/v) of *N*-methyl morpholine *N*-oxide / water (0.1 mL). Crystalline  $OsO_4$  (4.2 mg, 10 mol %) was added and the reaction was stirred for 12 h. The reaction mixture was concentrated and was pipetted directly on to a silica gel column using  $CH_2Cl_2$  (1 mL) in three portions. Impurities were eluted with ether and the product was eluted with MeOH/EtOAc/Hexane (10:40:50). Pure fractions were combined and concentrated to afford *manno*-tetrol **14a** (137 mg, 0.142 mmol, 86 %) as viscous oil.  $R_f$  (60% EtOAc/Hexane) = 0.20;  $[\alpha]_D^{26} = -20$  ( $c$  1,  $CH_3OH$ ); IR (thin film,  $cm^{-1}$ ) 3441, 2928, 2855, 1726, 1611, 1510, 1252, 1227, 1107, 1020, 835;  $^1H$  NMR (600 MHz,  $CDCl_3$ )  $\delta$  7.36 (m, 5H), 7.10 (m, 4H), 5.47 (d,  $J = 1.8$  Hz, 1H), 5.44 (d,  $J = 1.8$  Hz, 1H), 5.20 (dd,  $J = 10.2, 9.6$  Hz, 1H), 5.10 (br s, 2H), 4.87 (br s, 4H), 4.59 (m, 1H), 4.45 (dd,  $J = 9.0, 5.4$  Hz, 1H), 4.08 (dd,  $J = 9.0, 3.0$  Hz, 1H), 4.02 (dd,  $J = 3.0, 2.4$  Hz, 1H), 4.00 (d,  $J = 1.8$  Hz, 1H), 3.98 (dd,  $J = 9.0, 1.8$  Hz, 1H), 3.90 (dd,  $J = 10.2, 9.0$  Hz, 1H), 3.88 (ddd,  $J = 10.2, 6.6, 2.4$  Hz, 1H), 3.87 (dd,  $J = 10.2, 9.6$  Hz, 1H), 3.84 (dd,  $J = 4.8, 1.8$  Hz, 1H), 3.83 (m, 1H), 3.75 (m, 3H), 3.74 (dd,  $J = 4.2, 1.8$  Hz, 1H), 3.69 (ddd,  $J = 9.6, 6.6, 1.8$  Hz, 1H), 3.13 (dd,  $J = 13.8, 5.4$  Hz, 1H), 2.92 (dd,  $J = 13.8, 9.0$  Hz, 1H), 2.29 (dd,  $J = 15.0, 7.2$  Hz, 1H), 2.24 (dd,  $J = 15.0, 7.2$  Hz, 1H), 2.13 (m, 1H), 1.03 (d,  $J = 7.2$  Hz, 6H), 0.95 (s, 9H), 0.89 (s, 9H), 0.12 (s, 3H), 0.11 (s, 3H), 0.06 (s, 3H), 0.05 (s, 3H);  $^{13}C$  NMR (150 MHz,  $CDCl_3$ )  $\delta$  173.8, 171.9, 155.6, 136.2, 130.3(2C), 128.5(3C), 128.2, 128.0, 116.6(2C), 97.5, 96.9,

73.9, 71.49, 71.40, 71.0, 70.8, 70.3(2C), 68.8, 66.9, 63.0, 62.9, 54.8, 52.3, 43.4(2C), 37.4, 25.9(3C), 25.8(3C), 25.8, 22.3(2C), 22.3, 18.4, 18.3, -5.2, -5.3, -5.40, -5.46; CIHRMS Calcd for  $[C_{47}H_{75}NO_{16}Si_2Na^+]$ : 988.4516. Found 988.4485.

**1'-N-carbobenzyloxy-D-tyrosine methoxycarbonyl -5',5-(hydroxy methyl)-di-1,4- $\alpha$ -l-mannose - O-4' isovaleric ester (14):**

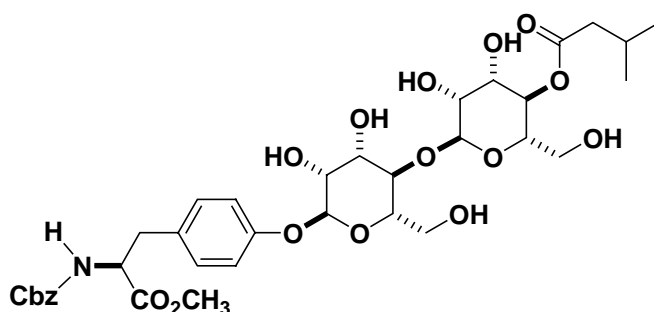

To a THF (0.8 mL, 0.1M) solution of *manno*-tetrol **14a** (67 mg, 0.16 mmol) at 0 °C was added a solution of TBAF in THF (138  $\mu$ L, 1.0M) and the reaction was stirred for 1 h. The reaction mixture was concentrated and was pipetted directly on to a silica gel column using CH<sub>2</sub>Cl<sub>2</sub> (1 mL) in three portions. Impurities were eluted with ether and the product was eluted with MeOH/EtOAc/Hexane (10:40:50). Pure fractions were combined and concentrated to afford **14** (40 mg, 0.054 mmol, 78 %) as viscous oil.  $R_f$  (10:50:40% MeOH/EtOAc/Hexane) = 0.20;  $[\alpha]_D^{26} = -110$  ( $c$  0.5, CH<sub>3</sub>OH); IR (thin film, cm<sup>-1</sup>) 3337, 2956, 2926, 1738, 1611, 1510, 1228, 1217, 1094, 976, 834; <sup>1</sup>H NMR (600 MHz, CDCl<sub>3</sub>)  $\delta$  7.35 (m, 5H), 7.10 (m, 4H), 5.48 (d,  $J = 1.8$  Hz, 1H), 5.42 (d,  $J = 2.4$  Hz, 1H), 5.12 (dd,  $J = 9.6, 9.6$  Hz, 1H), 5.07 (br s, 2H), 4.59 (s, 1H), 4.45 (ddd,  $J = 12.6, 9.6, 1.2$  Hz, 1H), 4.10 (dd,  $J = 9.0, 3.6$  Hz, 1H), 4.02-4.08 (m, 4H), 4.00 (dd,  $J = 3.6, 1.8$  Hz, 1H), 3.89 (dd,  $J = 9.6, 3.0$  Hz, 1H), 3.83 (dd,  $J = 5.4, 3.0$  Hz, 1H), 3.80 (dd,  $J = 7.2, 5.4$  Hz, 1H), 3.77-3.72 (m, 1H), 3.75 (s, 3H), 3.67 (s, 1H), 3.62 (dd,  $J = 6.0, 3.0$  Hz, 1H), 3.35 (br s, 4H), 3.14 (dd,  $J = 13.8, 4.2$  Hz, 1H), 2.92 (dd,  $J = 13.8, 9.0$  Hz, 1H), 2.31 (dd,  $J = 14.4, 7.2$  Hz, 1H), 2.30 (dd,  $J = 7.2, 2.4$  Hz, 1H), 2.27 (dd,  $J =$

14.4, 7.2 Hz, 1H), 2.14 (m, 1H), 1.02 (d,  $J = 6.6$  Hz, 6H); NMR (150 MHz,  $\text{CDCl}_3$ )  $\delta$  173.6, 172.0, 155.7, 136.1, 130.3(2C), 128.4(3C), 128.1, 127.9, 116.3(2C), 101.6, 97.9, 73.9, 71.9, 71.6(2C), 71.1, 70.6, 69.3, 66.9, 60.9, 60.6, 60.4, 54.8, 52.2, 43.3, 42.9, 37.2, 29.5, 25.6, 22.23, 22.20; CIHRMS Calcd for  $[\text{C}_{35}\text{H}_{47}\text{NO}_{16}\text{Na}^+]$ : 760.2787. Found 760.2750.

**1'-N-carbobenzyloxy-D-tyrosine methoxycarbonyl -5',5-(*tert*-butyl-dimethylsilanyloxymethyl)-2,3,2',3'-bis acetonide-di-1,4- $\alpha$ -l-mannose-O-4'-isovaleric ester (15):**

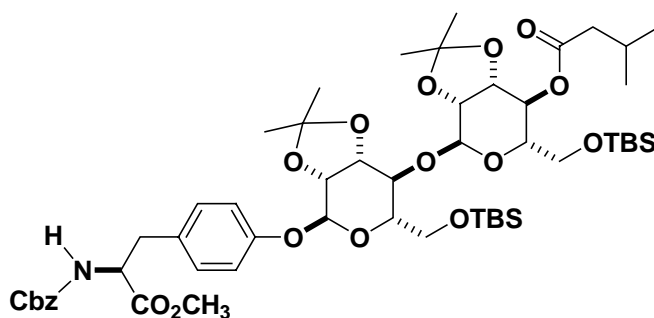

To a  $\text{CH}_2\text{Cl}_2$  (0.1 mL, 1.0M) solution of *manno*-tetrol **14a** (25 mg, 0.02 mmol) and 2,2-dimethoxypropane (5.7 mg, 0.05 mmol) at 0 °C was added CSA (0.60 mg, 10 mol%) and the reaction was stirred for 6 h. The reaction mixture was concentrated and was pipetted directly on to a silica gel column using  $\text{CH}_2\text{Cl}_2$  (1 mL) in three portions. Impurities were eluted with ether and the product was eluted with EtOAc/Hexane (40:60). Pure fractions were combined and concentrated to afford **15** (22 mg, 0.02 mmol, 81 %) as viscous oil.  $R_f$  (50% EtOAc/Hexane) = 0.44;  $[\alpha]_{\text{D}}^{26} = -31$  (c 1,  $\text{CH}_2\text{Cl}_2$ ); IR (thin film,  $\text{cm}^{-1}$ ) 2953, 2928, 1726, 1510, 1220, 1091, 1019, 833;  $^1\text{H}$  NMR (600 MHz,  $\text{CDCl}_3$ )  $\delta$  7.31 (m, 5H), 6.96 (m, 4H), 5.51 (d,  $J = 1.2$  Hz, 1H), 5.42 (d,  $J = 1.8$  Hz, 1H), 5.06 (br s, 2H), 4.96 (dd,  $J = 10.2, 7.8$  Hz, 2H), 4.62 (dd,  $J = 13.8, 5.4$  Hz, 1H), 4.25 (dd,  $J = 9.6, 3.6$  Hz, 1H), 4.16 (dd,  $J = 12.6, 5.4$  Hz, 1H), 4.10 (d,  $J = 5.4$  Hz, 1H), 4.00 (m, 1H), 3.91 (m, 1H), 3.89 (dd,  $J = 10.2, 6.0$  Hz, 1H), 3.86 (dd,  $J = 9.6, 4.8$  Hz, 1H), 3.84 (d,  $J = 9.0$  Hz, 1H), 3.75 (m, 2H), 3.69 (s, 3H), 3.64 (d,  $J = 5.4$  Hz, 1H), 3.02 (m, 2H), 3.03 (d,  $J = 6.0$  Hz, 1H), 2.73 (s, 1H), 2.56 (s, 1H), 2.24 (dd,  $J = 14.4, 7.2$  Hz, 1H), 2.20 (m, 1H), 2.16 (s, 1H), 2.12 (dd,  $J = 13.2, 6.0$  Hz, 1H), 0.94 (d,  $J = 6.6$  Hz, 6H), 0.87 (s, 9H), 0.81 (s, 9H), 0.06 (s, 3H), 0.04 (s, 3H), -0.08 (s, 3H), -0.01 (s, 3H);

$^{13}\text{C}$  NMR (150 MHz,  $\text{CDCl}_3$ )  $\delta$  172.0, 171.9, 155.5, 155.4, 130.3(2C), 128.4(3C), 128.1(2C), 128.0, 116.8(2C), 109.9 (2C), 97.7, 95.0, 76.0, 75.8, 73.8, 71.2, 70.8, 69.8, 69.1(2C), 66.9, 63.1, 62.9, 54.8, 54.7, 52.2, 43.3(2C), 37.2, 29.6, 27.4, 26.3, 25.85(3C), 25.81(3C), 25.6, 22.3, 22.2, 18.4, 18.3, -5.3(2C), -5.47, -5.57; CIHRMS Calcd for  $[\text{C}_{53}\text{H}_{83}\text{NO}_{16}\text{Si}_2\text{Na}^+ - \text{C}_3\text{H}_6^{2+}]$ : 1028.5142. Found 1028.4585.

**(1'R,4'R,5'S,1R,4R,5S)-1-[1'-N-carbobenzyloxy-D-tyrosine methoxycarbonyl -5'-(*tert*-butyl-dimethylsilanyloxymethyl)-tetrahydro-pyran-4'-yloxy]-5-(*tert*-butyl-dimethylsilanyloxymethyl)-tetrahydro-pyran-O-4'-isovaleric ester (**17**):**

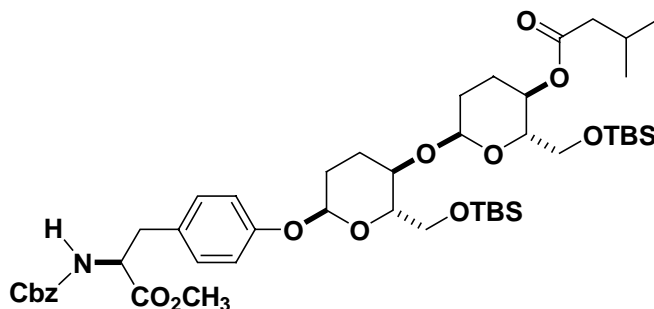

The diene ester **13** (27 mg, 0.03 mmol) and  $o\text{-NO}_2\text{C}_6\text{H}_4\text{SO}_2\text{NHNH}_2$  (91.6 mg, 0.45 mmol) were dissolved in 0.3 mL of  $\text{CH}_2\text{Cl}_2$  in a round bottom flask and cooled to  $0^\circ\text{C}$  under nitrogen atmosphere then triethylamine (60.6 mg, 0.60 mmol) was added and the reaction mixture was stirred at  $0^\circ\text{C}$  for 12 hours and on completion, as monitored by TLC. The reaction mixture was concentrated and was pipetted directly on to a silica gel column using  $\text{CH}_2\text{Cl}_2$  (1 mL) in three portions. The crude product was purified using silica gel flash chromatography eluting with 15% EtOAc/hexanes to give **17** (26.2 mg, 0.03 mmol, 97 %) as viscous oil.  $R_f$  (30% EtOAc/Hexane) = 0.46;  $[\alpha]_{\text{D}}^{26} = -59$  ( $c$  2,  $\text{CH}_2\text{Cl}_2$ ); IR (thin film,  $\text{cm}^{-1}$ ) 2955, 2928, 1738, 1510, 1252, 1219, 1122, 996, 835;  $^1\text{H}$  NMR (600 MHz,  $\text{CDCl}_3$ )  $\delta$  7.33 (m, 5H), 6.97 (m, 4H), 5.44 (br s, 1H), 5.24 (d,  $J = 7.8$  Hz, 1H), 5.08 (br s, 2H), 5.07 (d,  $J = 2.4$  Hz, 1H), 4.73 (ddd,  $J = 10.2, 9.6, 4.8$  Hz, 1H), 4.60 (ddd,  $J = 7.8, 5.4, 5.4$  Hz, 1H), 3.85 (d,  $J = 11.4$  Hz, 1H), 3.78-3.64 (m, 6H), 3.70 (s, 3H), 3.05 (dd,  $J = 13.2, 6.0$  Hz, 1H), 3.01

(dd,  $J = 13.2, 5.4$  Hz, 1H), 2.13 (m, 3H), 2.06 (ddd,  $J = 13.2, 6.6, 6.6$  Hz, 1H), 2.00 (m, 2H), 1.80 (m, 3H), 1.71 (m, 2H), 0.93 (d,  $J = 6.6$  Hz, 6H), 0.88 (s, 9H), 0.84 (s, 9H), 0.02 (s, 6H), 0.018 (s, 3H), 0.004 (s, 3H);  $^{13}\text{C}$  NMR (150 MHz,  $\text{CDCl}_3$ )  $\delta$  172.1, 172.0, 156.2, 136.2, 130.1(2C), 128.6, 128.4(2C), 128.1, 128.0, 116.9(2C), 94.9, 90.5, 75.0, 73.3, 71.5, 67.5, 66.9, 66.3, 63.2, 62.6, 54.8, 52.2, 43.6, 37.3, 28.7, 25.92(3C), 25.91(3C), 25.7, 23.6, 22.3(2C), 22.2(2C), 22.0, 18.4, 18.3, -5.1, -5.3, -5.43, -5.46; CIHRMS Calcd for  $[\text{C}_{47}\text{H}_{75}\text{NO}_{12}\text{Si}_2\text{Na}^+]$ : 924.4720. Found 924.4717.

**Section C:  $^1\text{H}$  NMR and  $^{13}\text{C}$  NMR Spectra.**

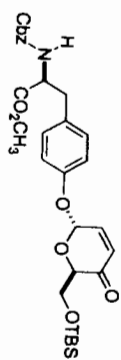

600 MHz <sup>1</sup>H NMR, CDCl<sub>3</sub>

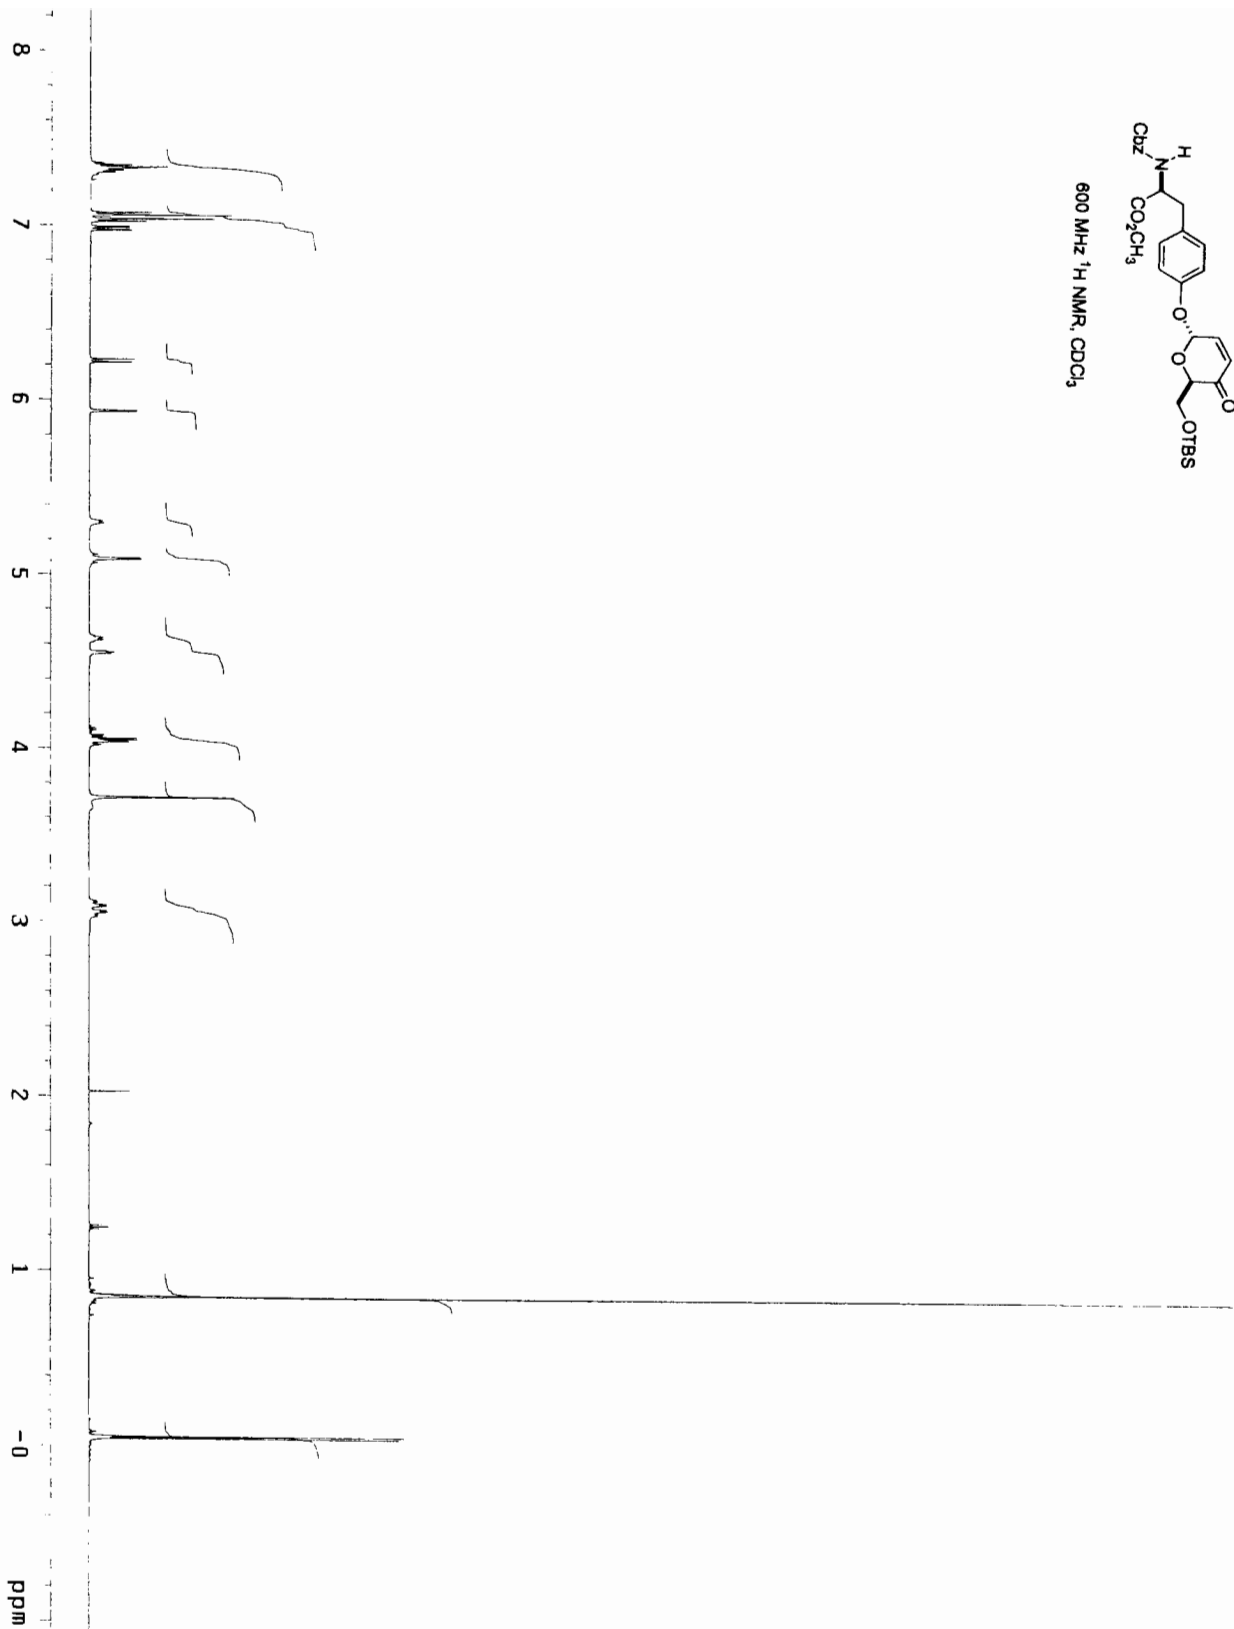

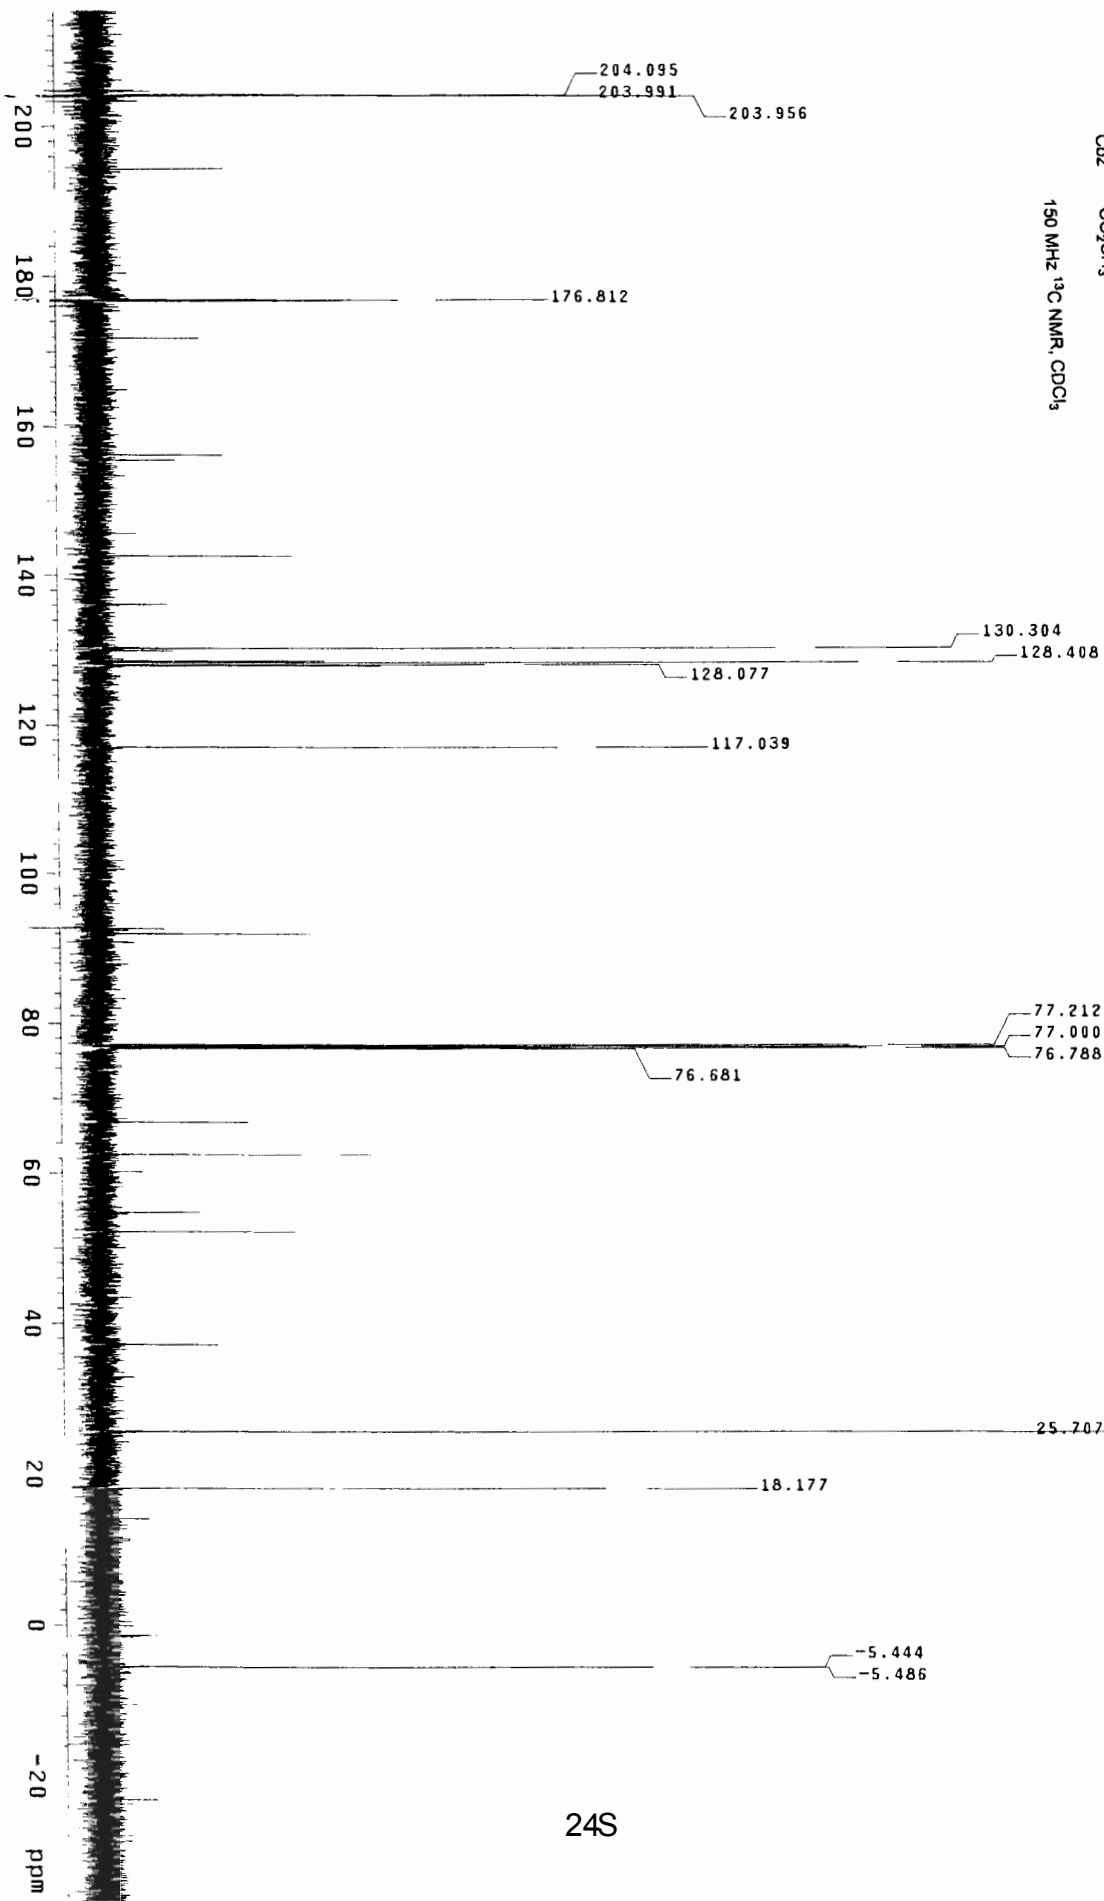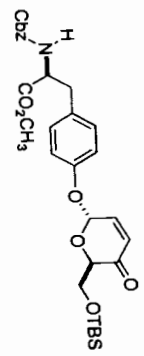



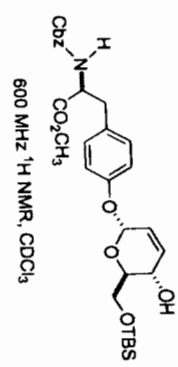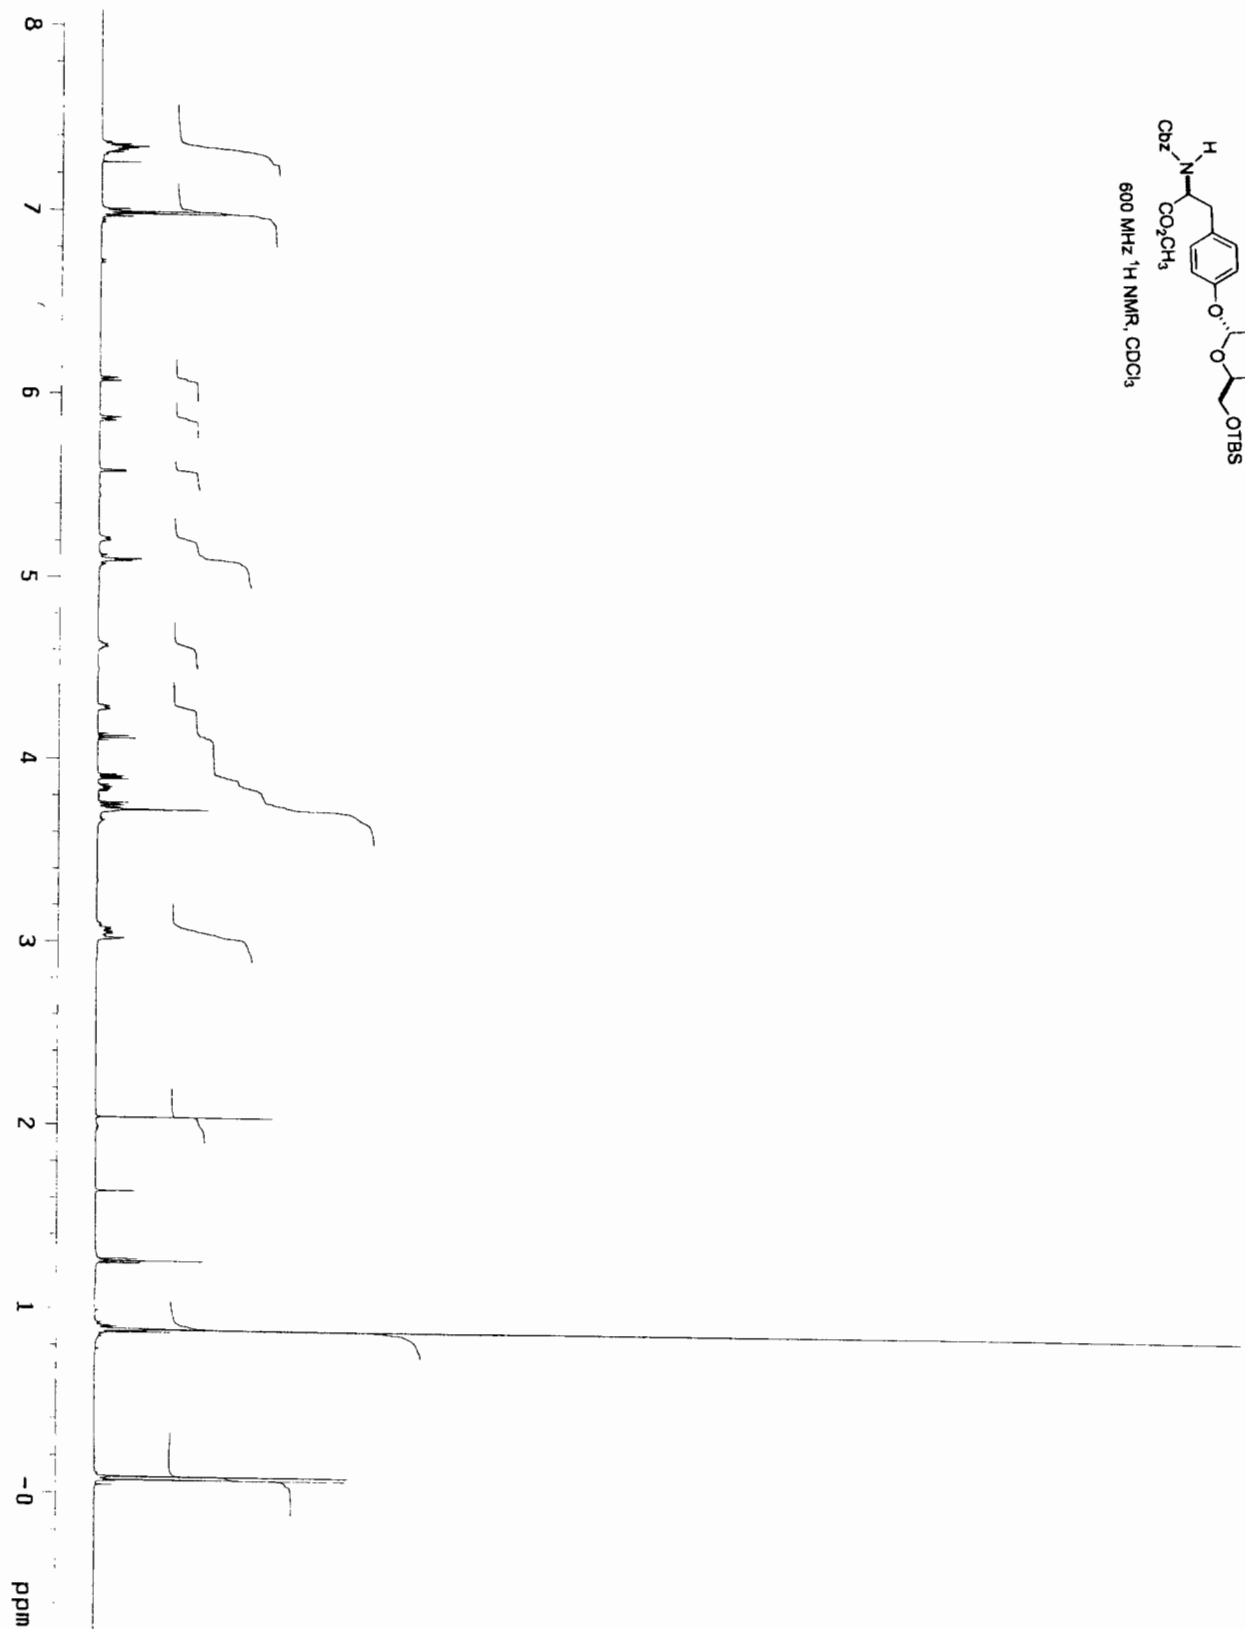

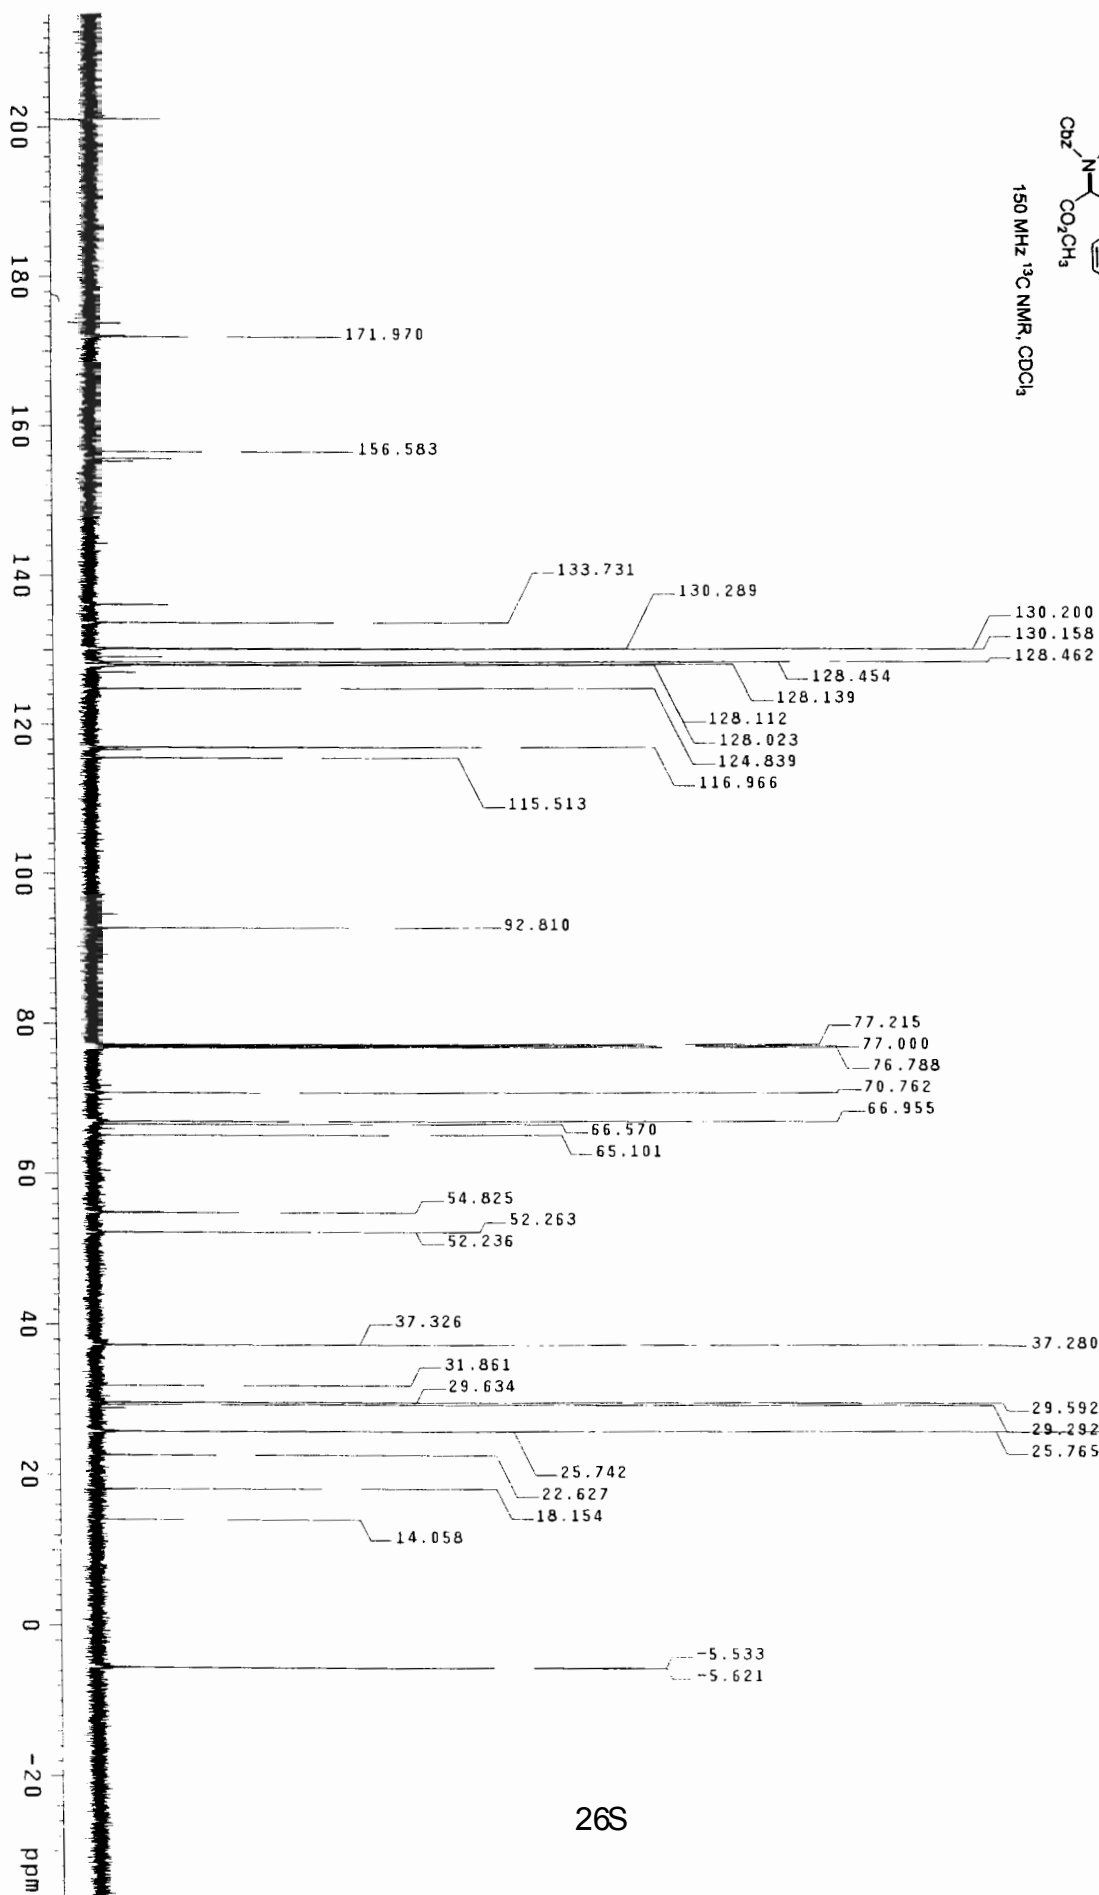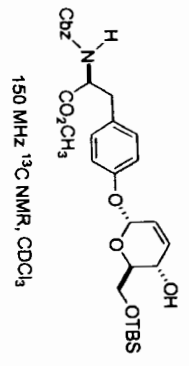

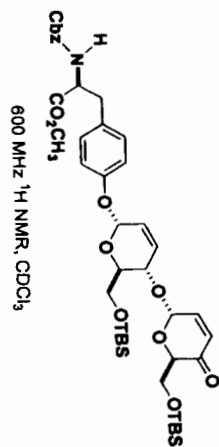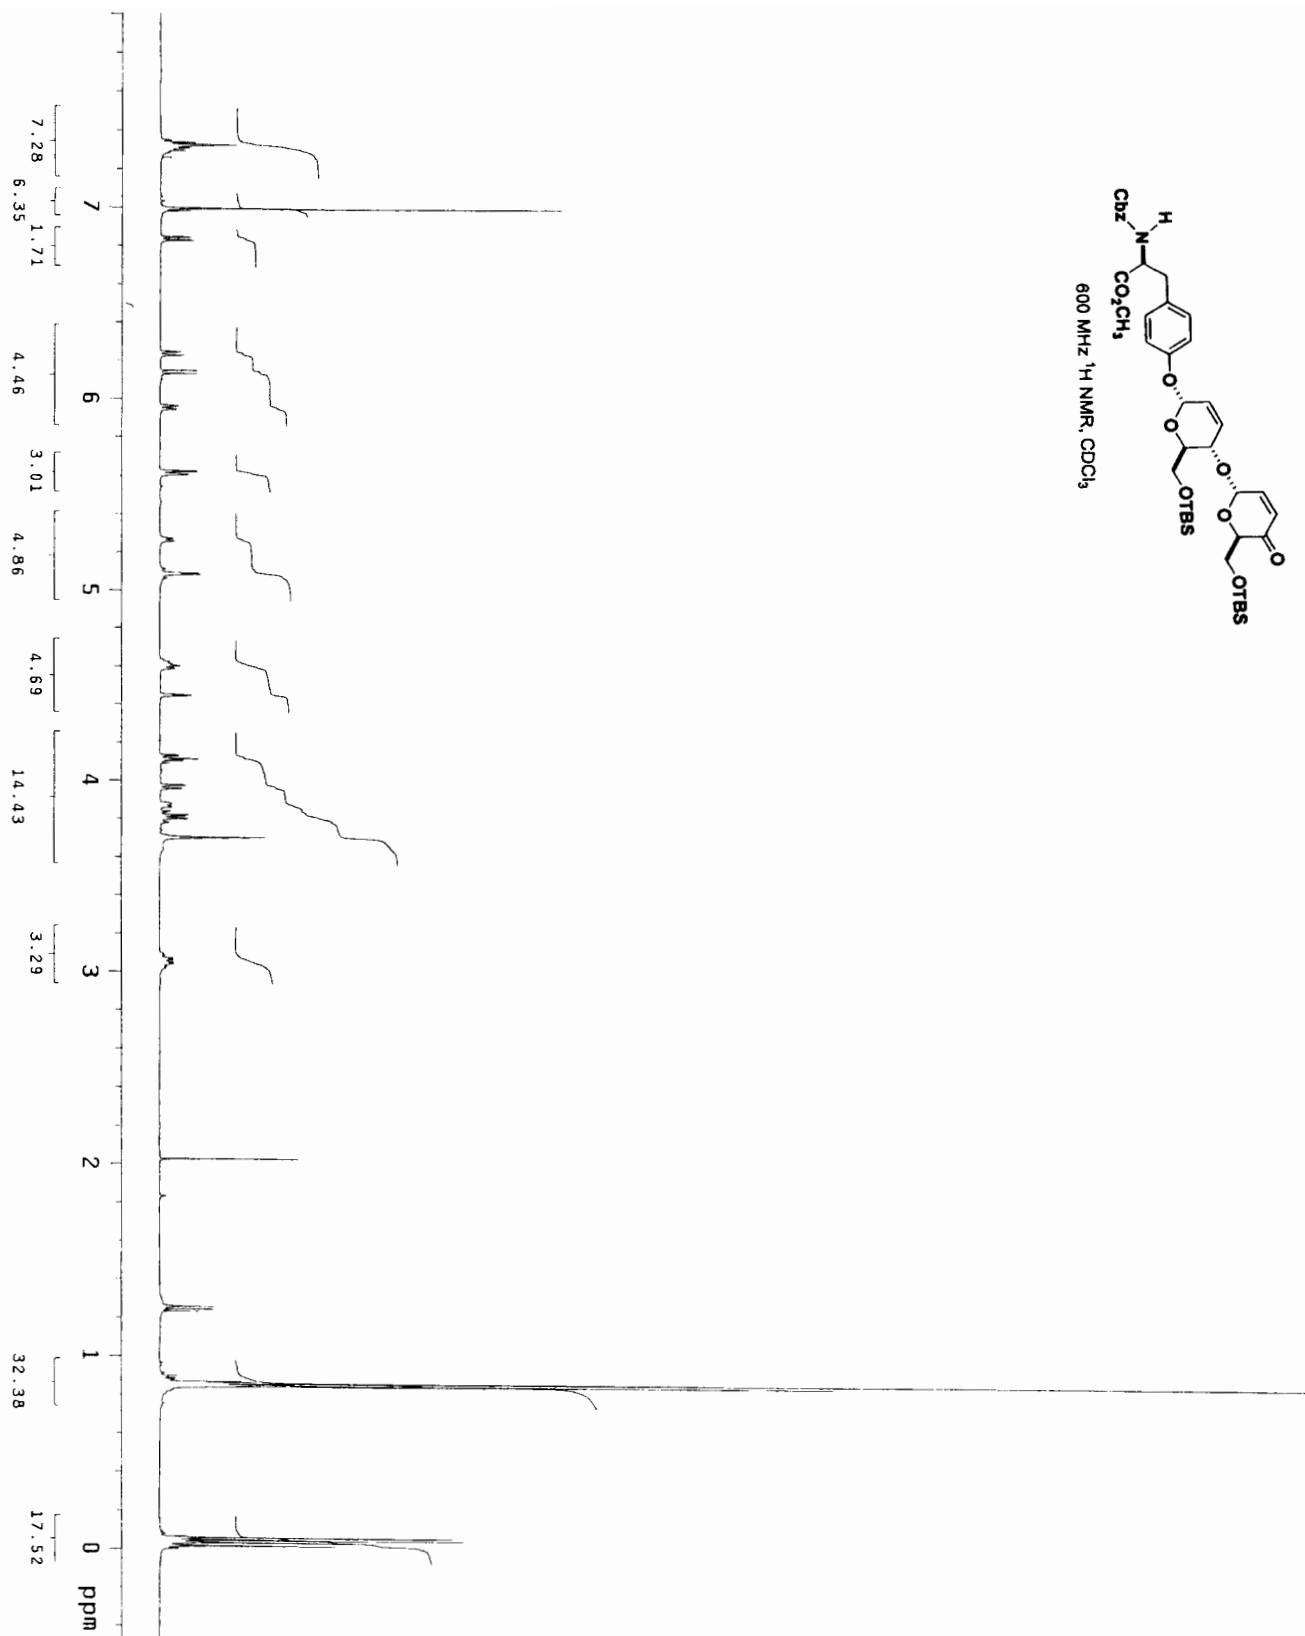



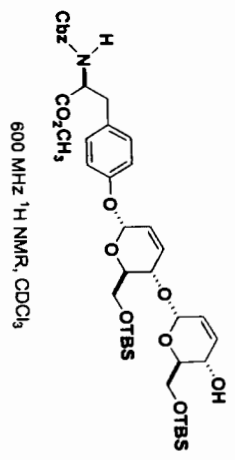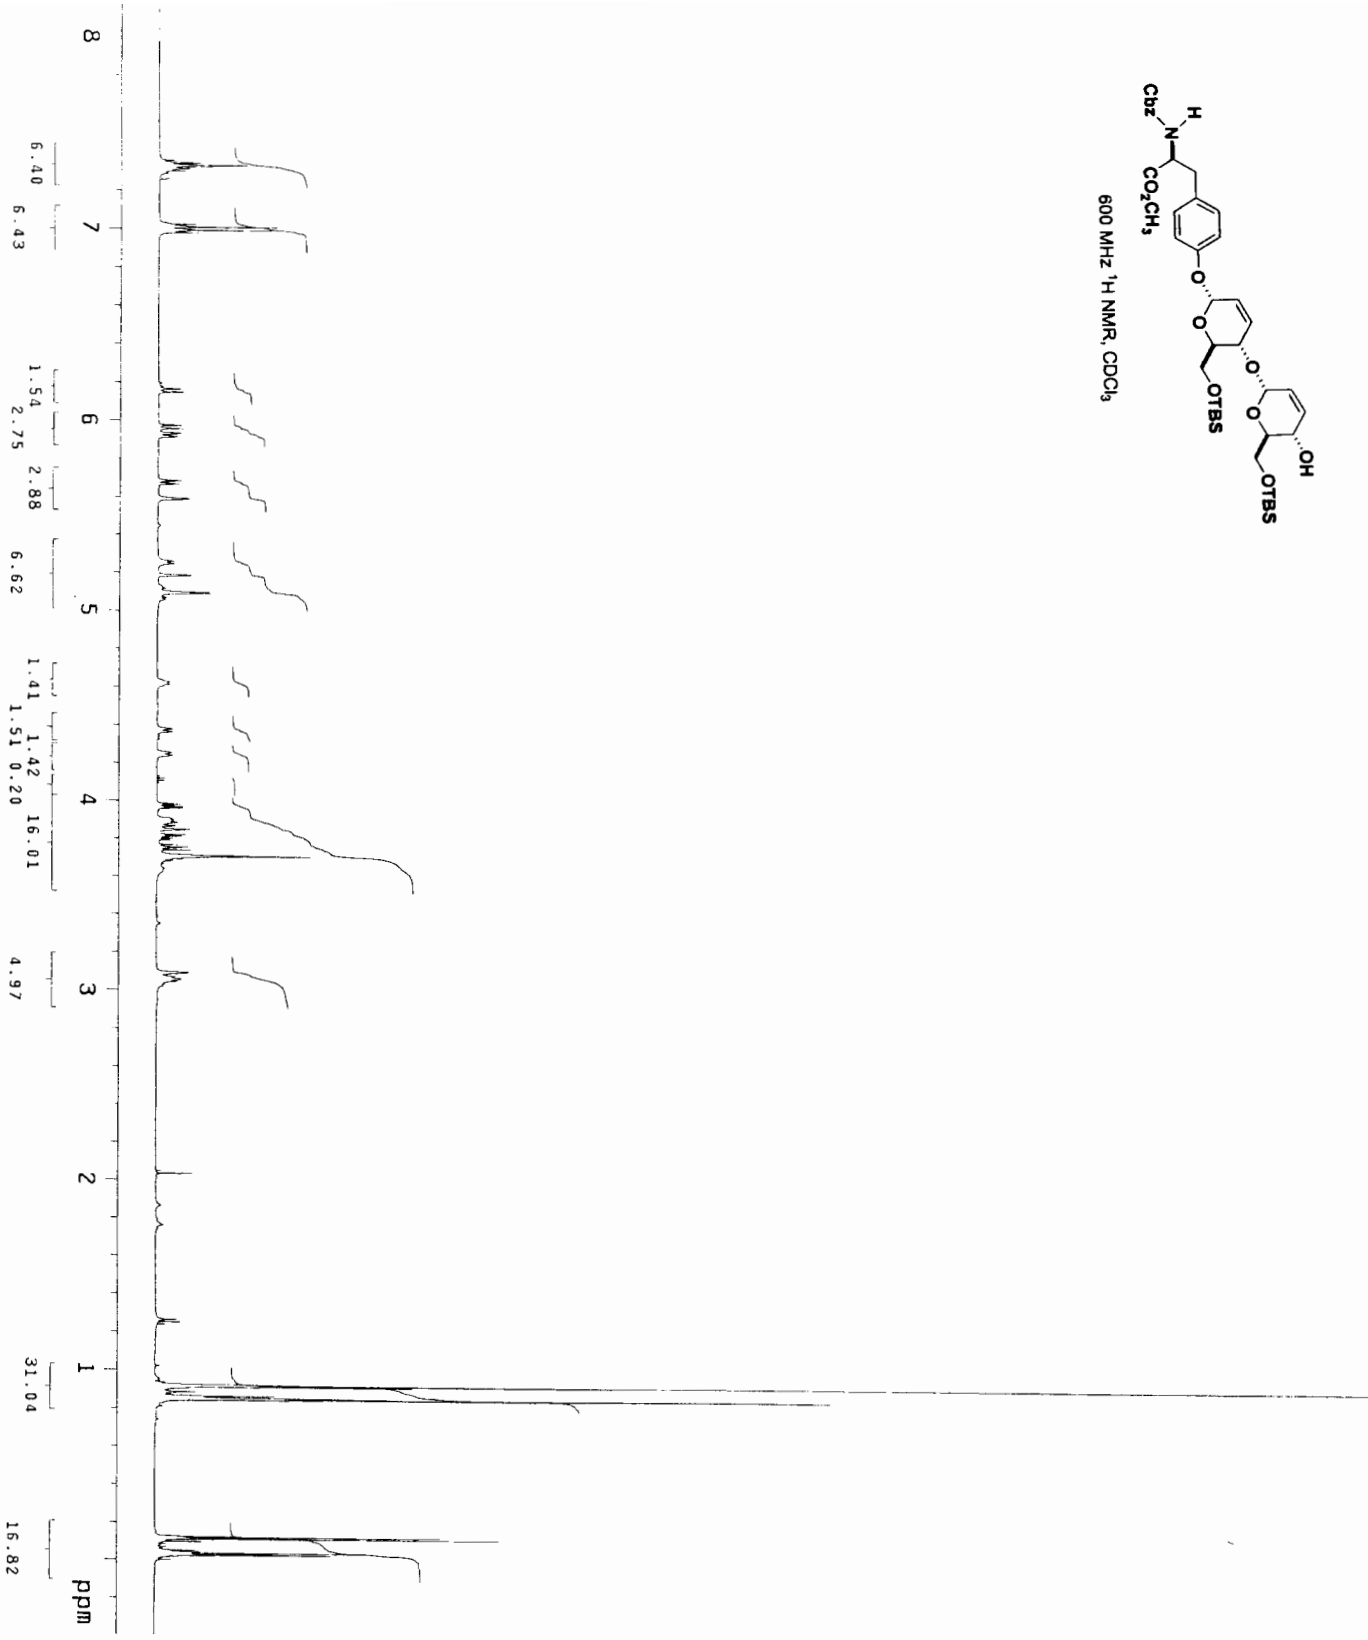

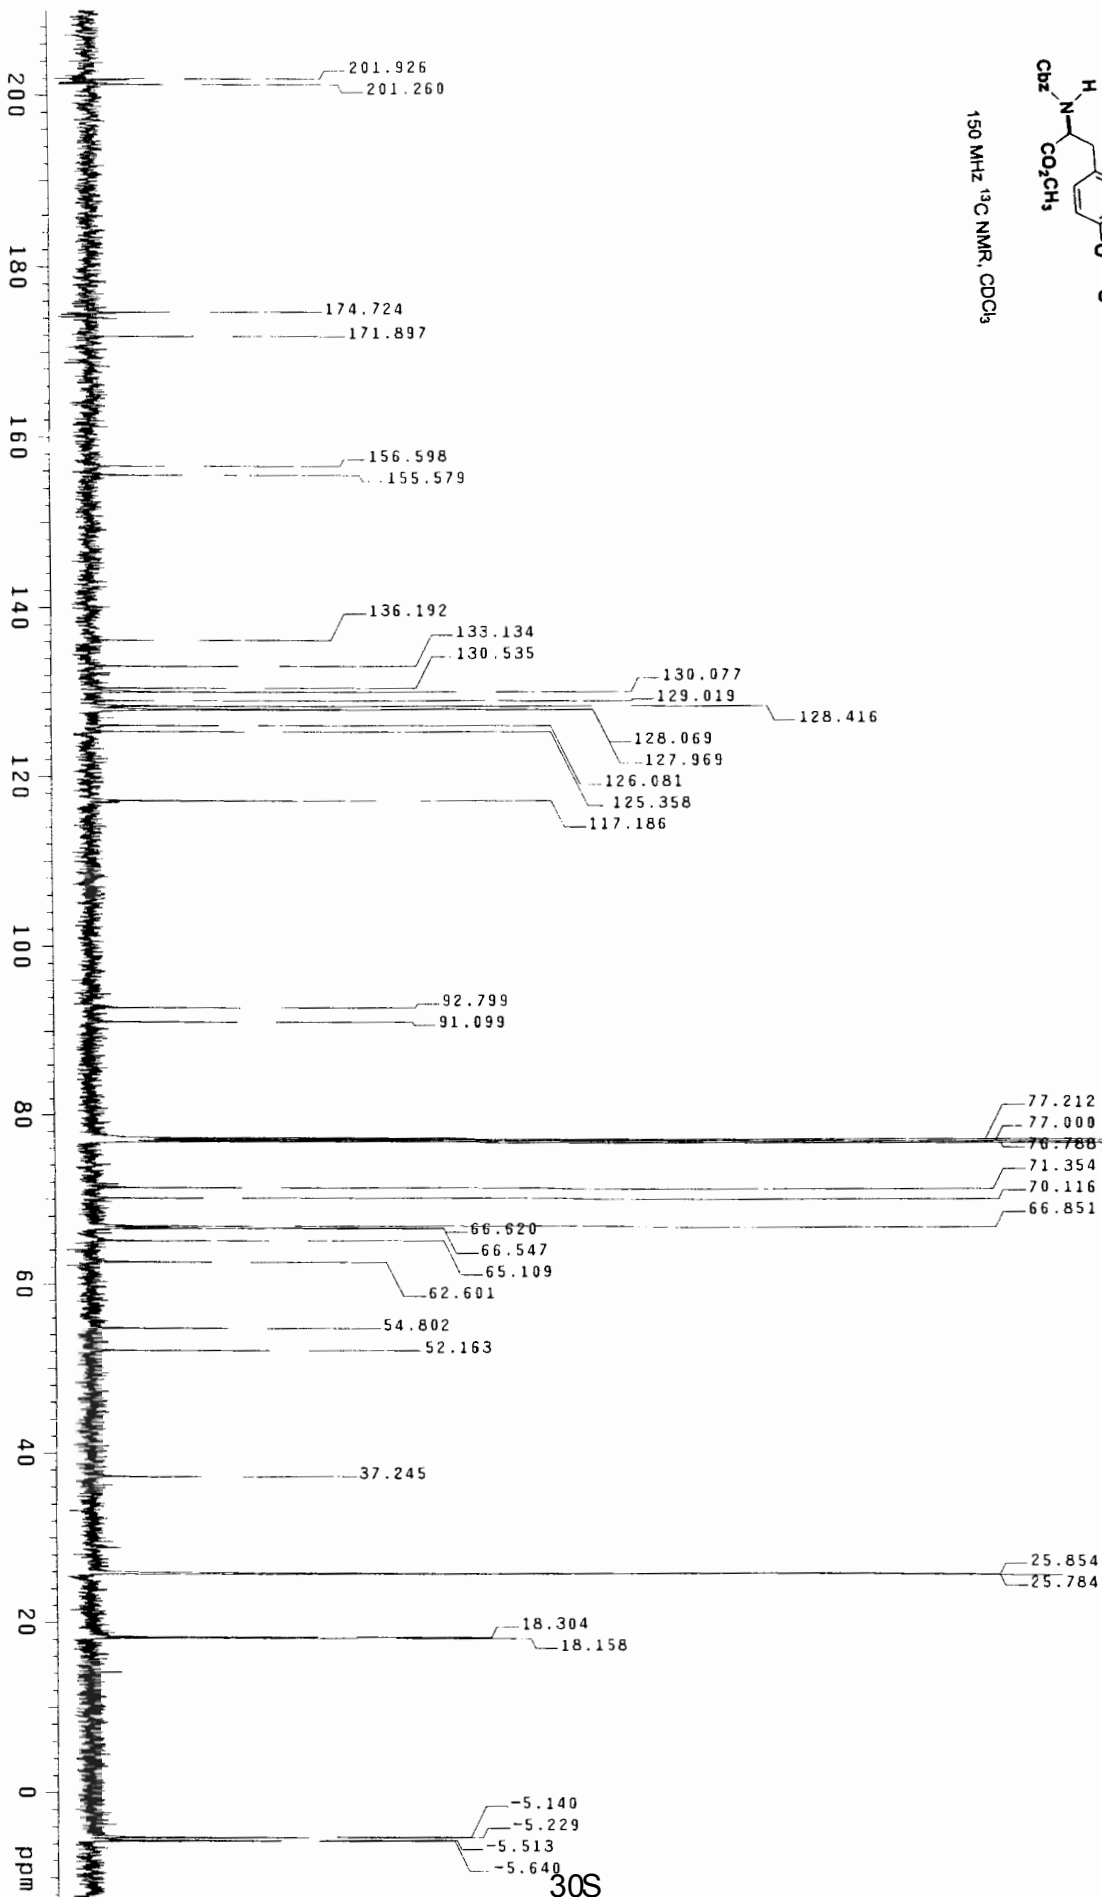

30S

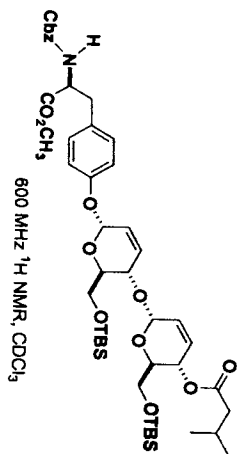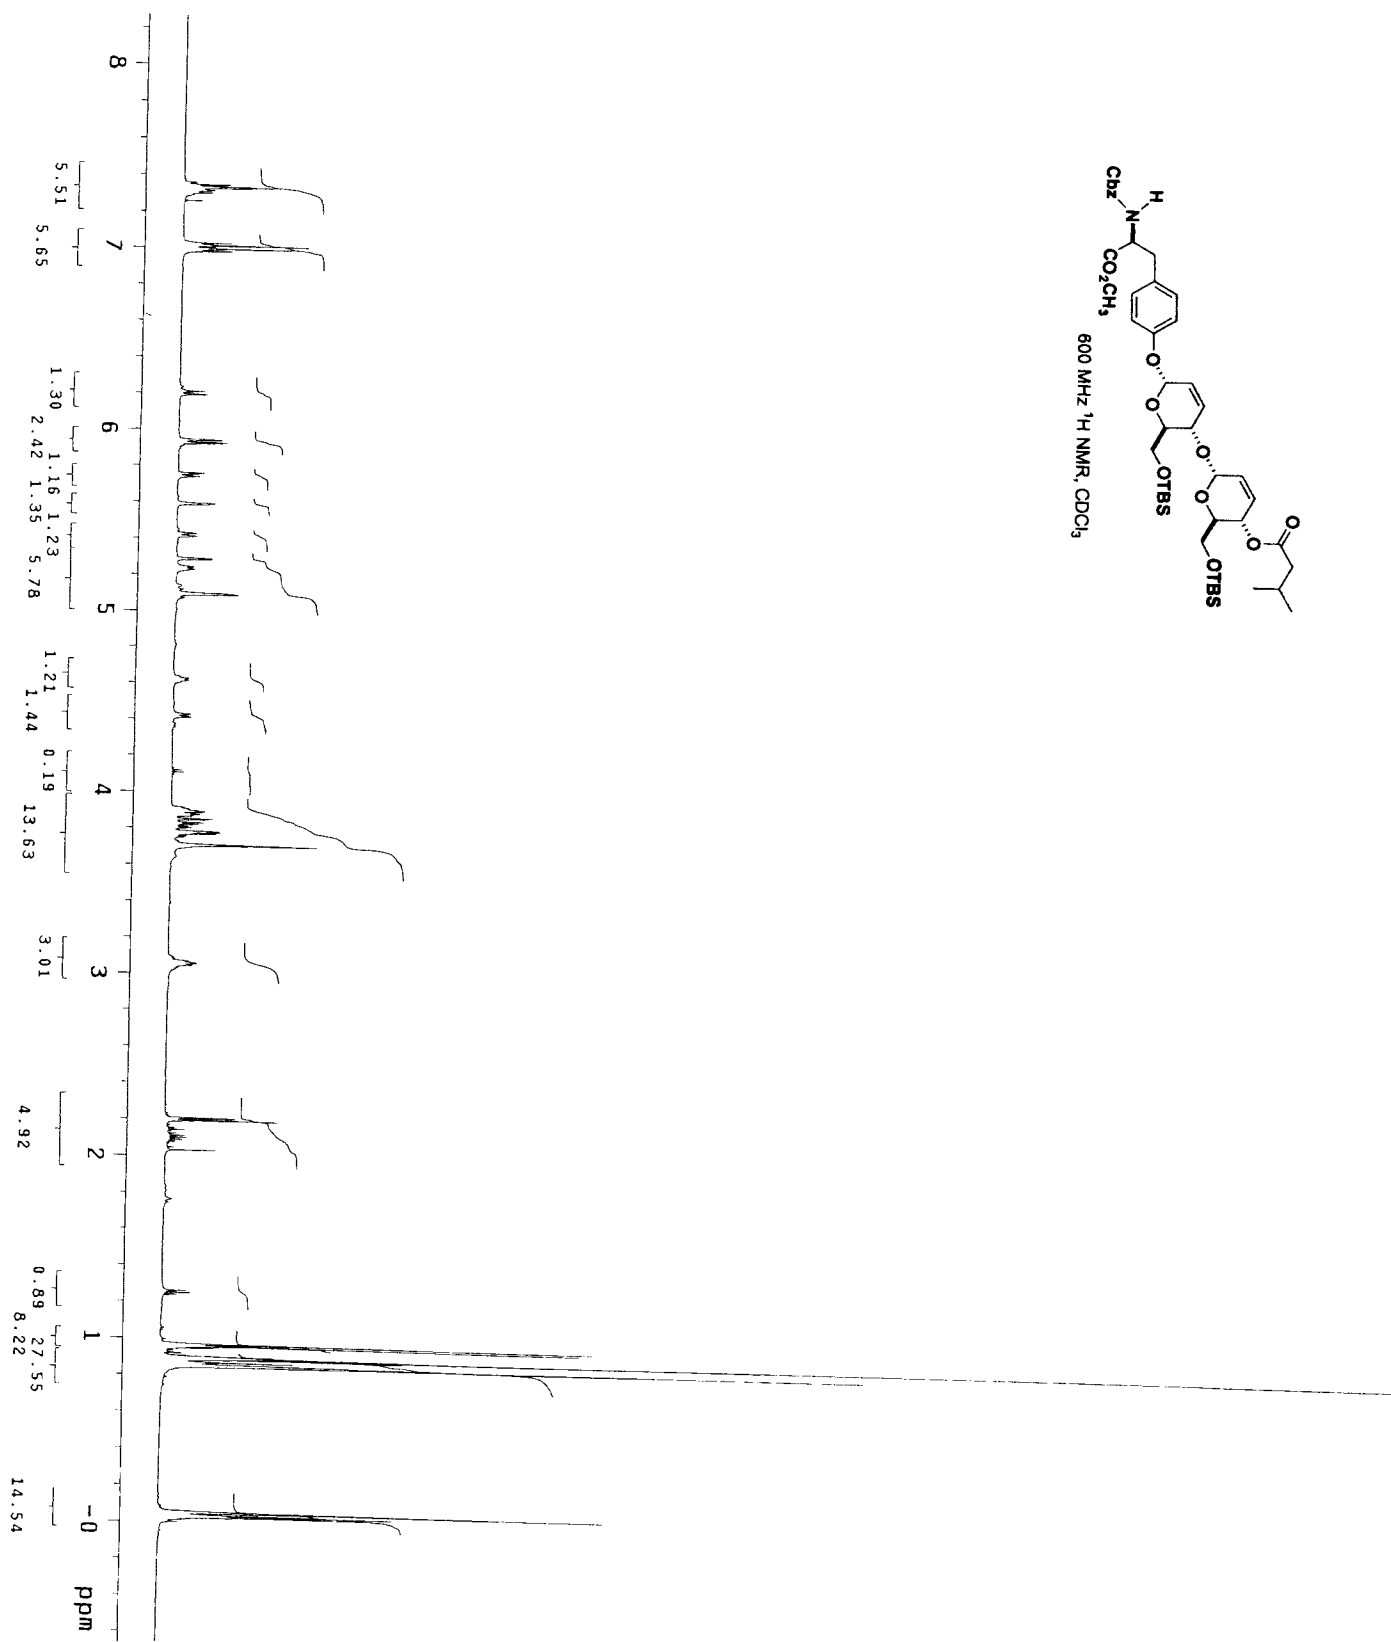

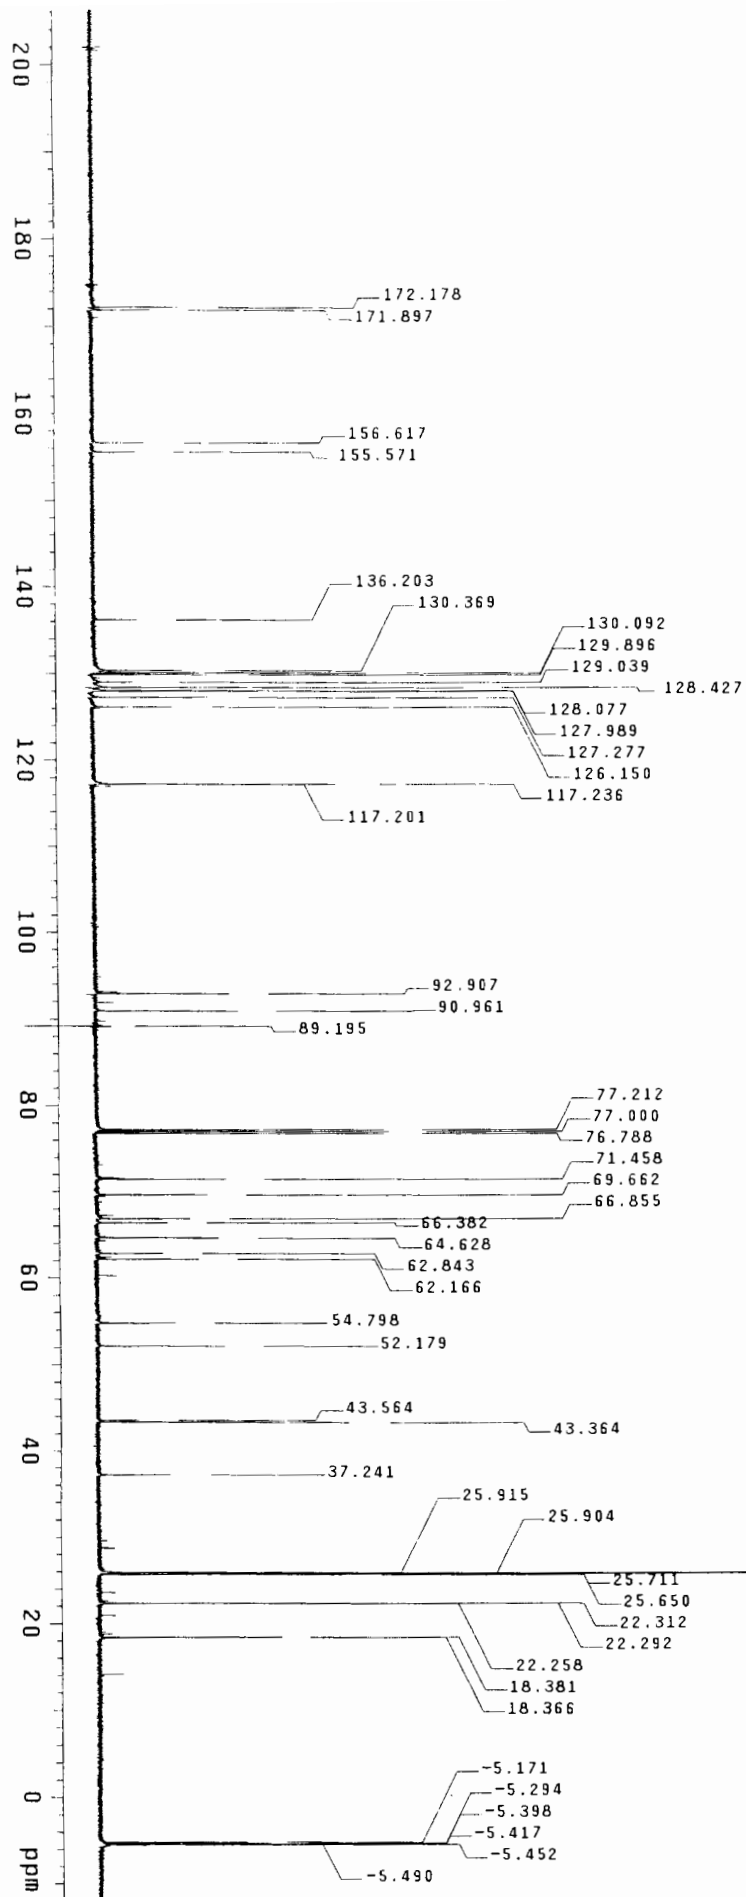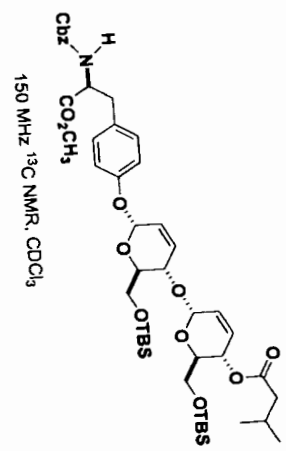



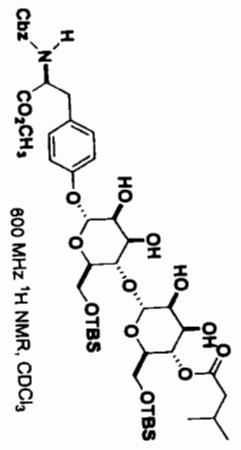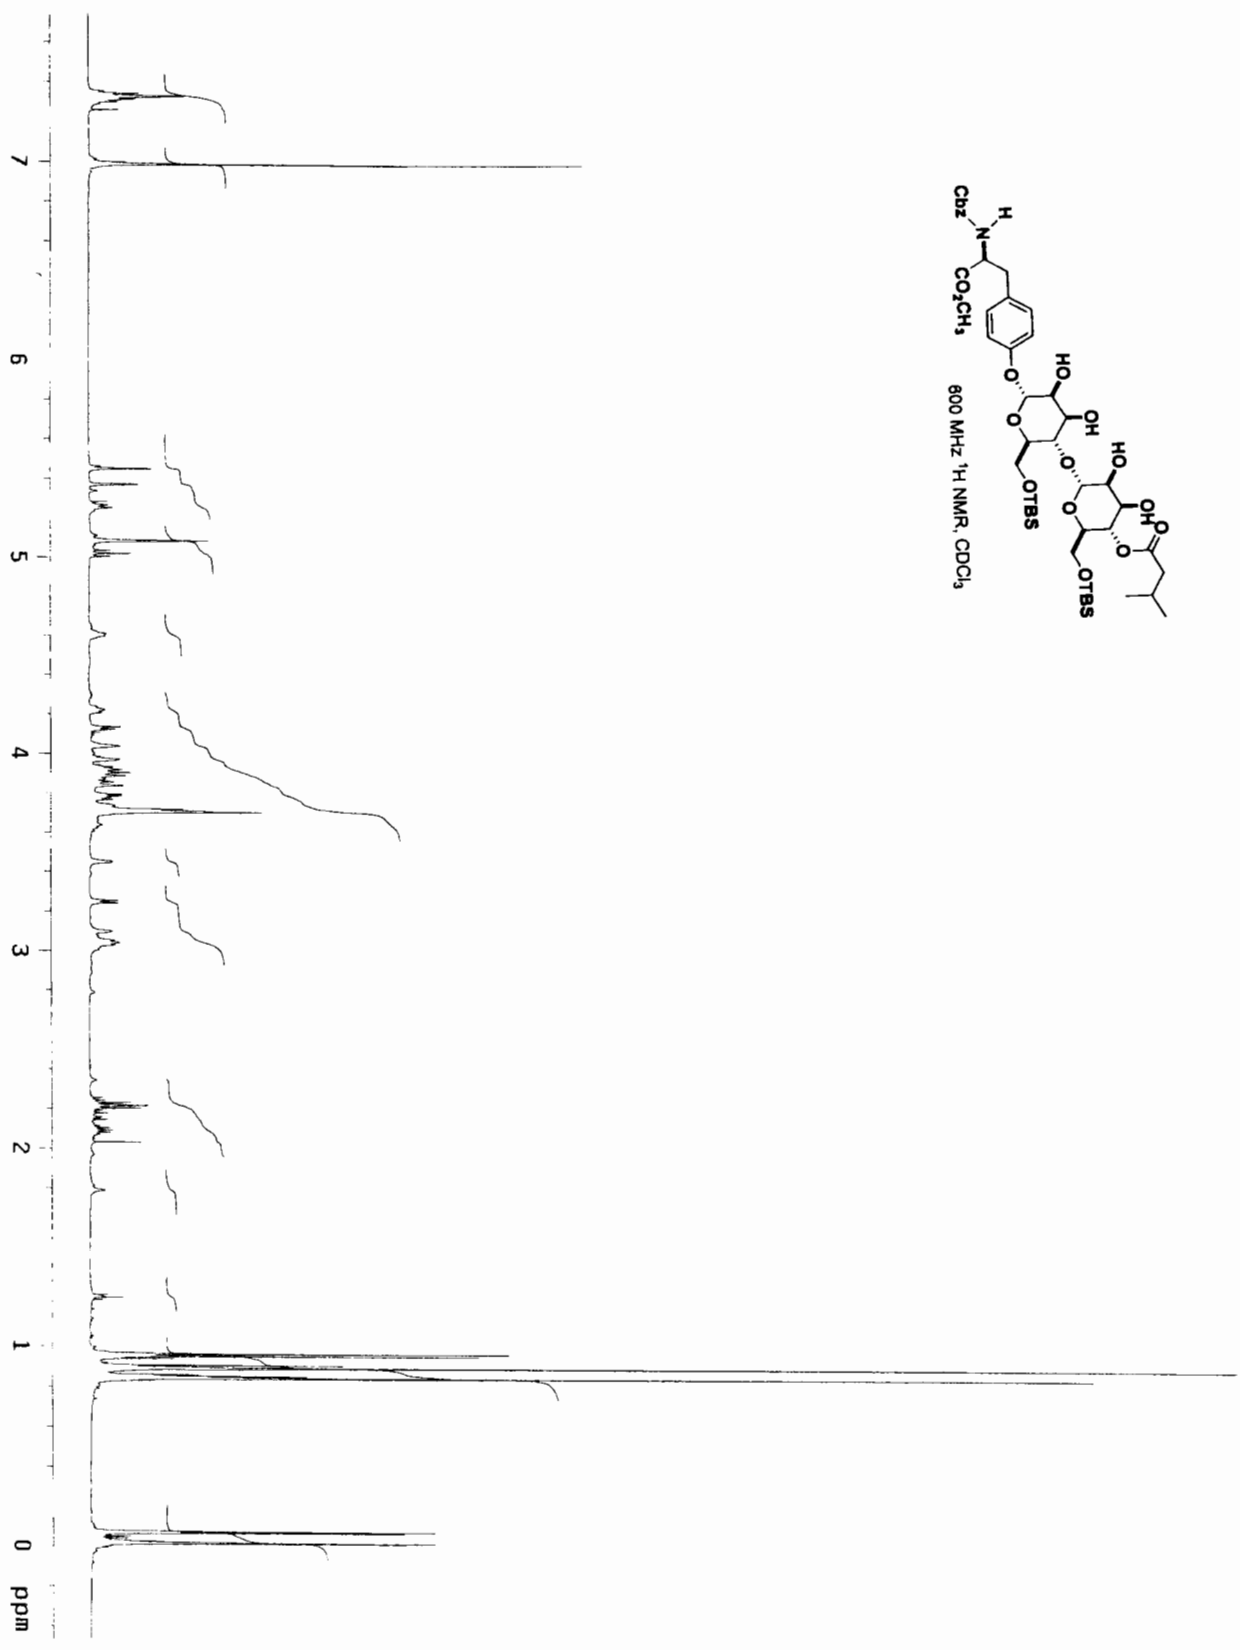

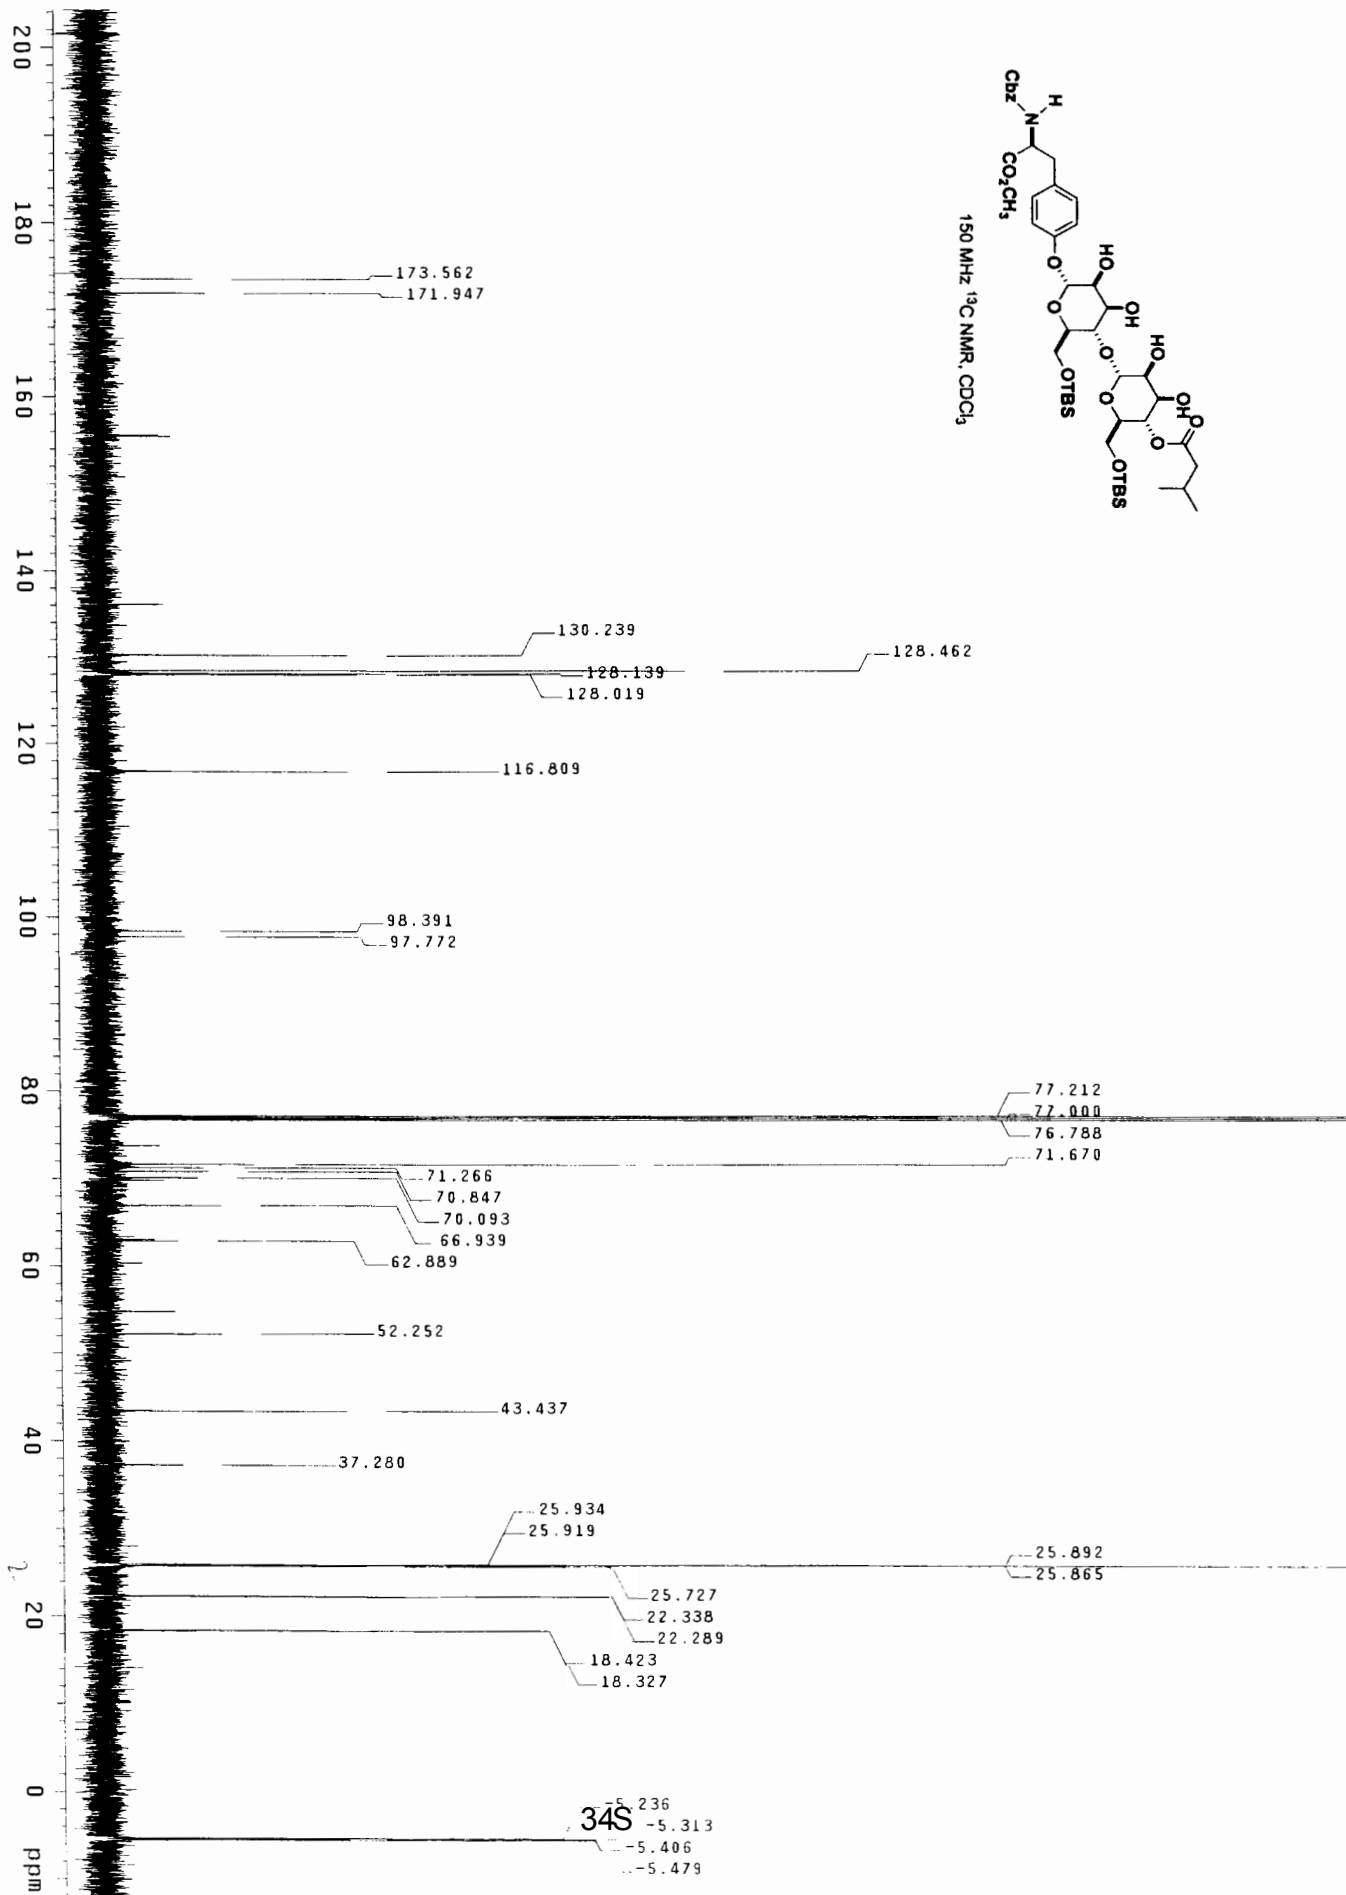

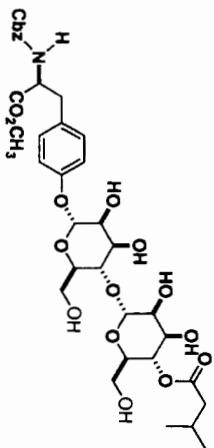

10  
9  
8  
7  
6  
5  
4  
3  
2  
1  
-0  
ppm

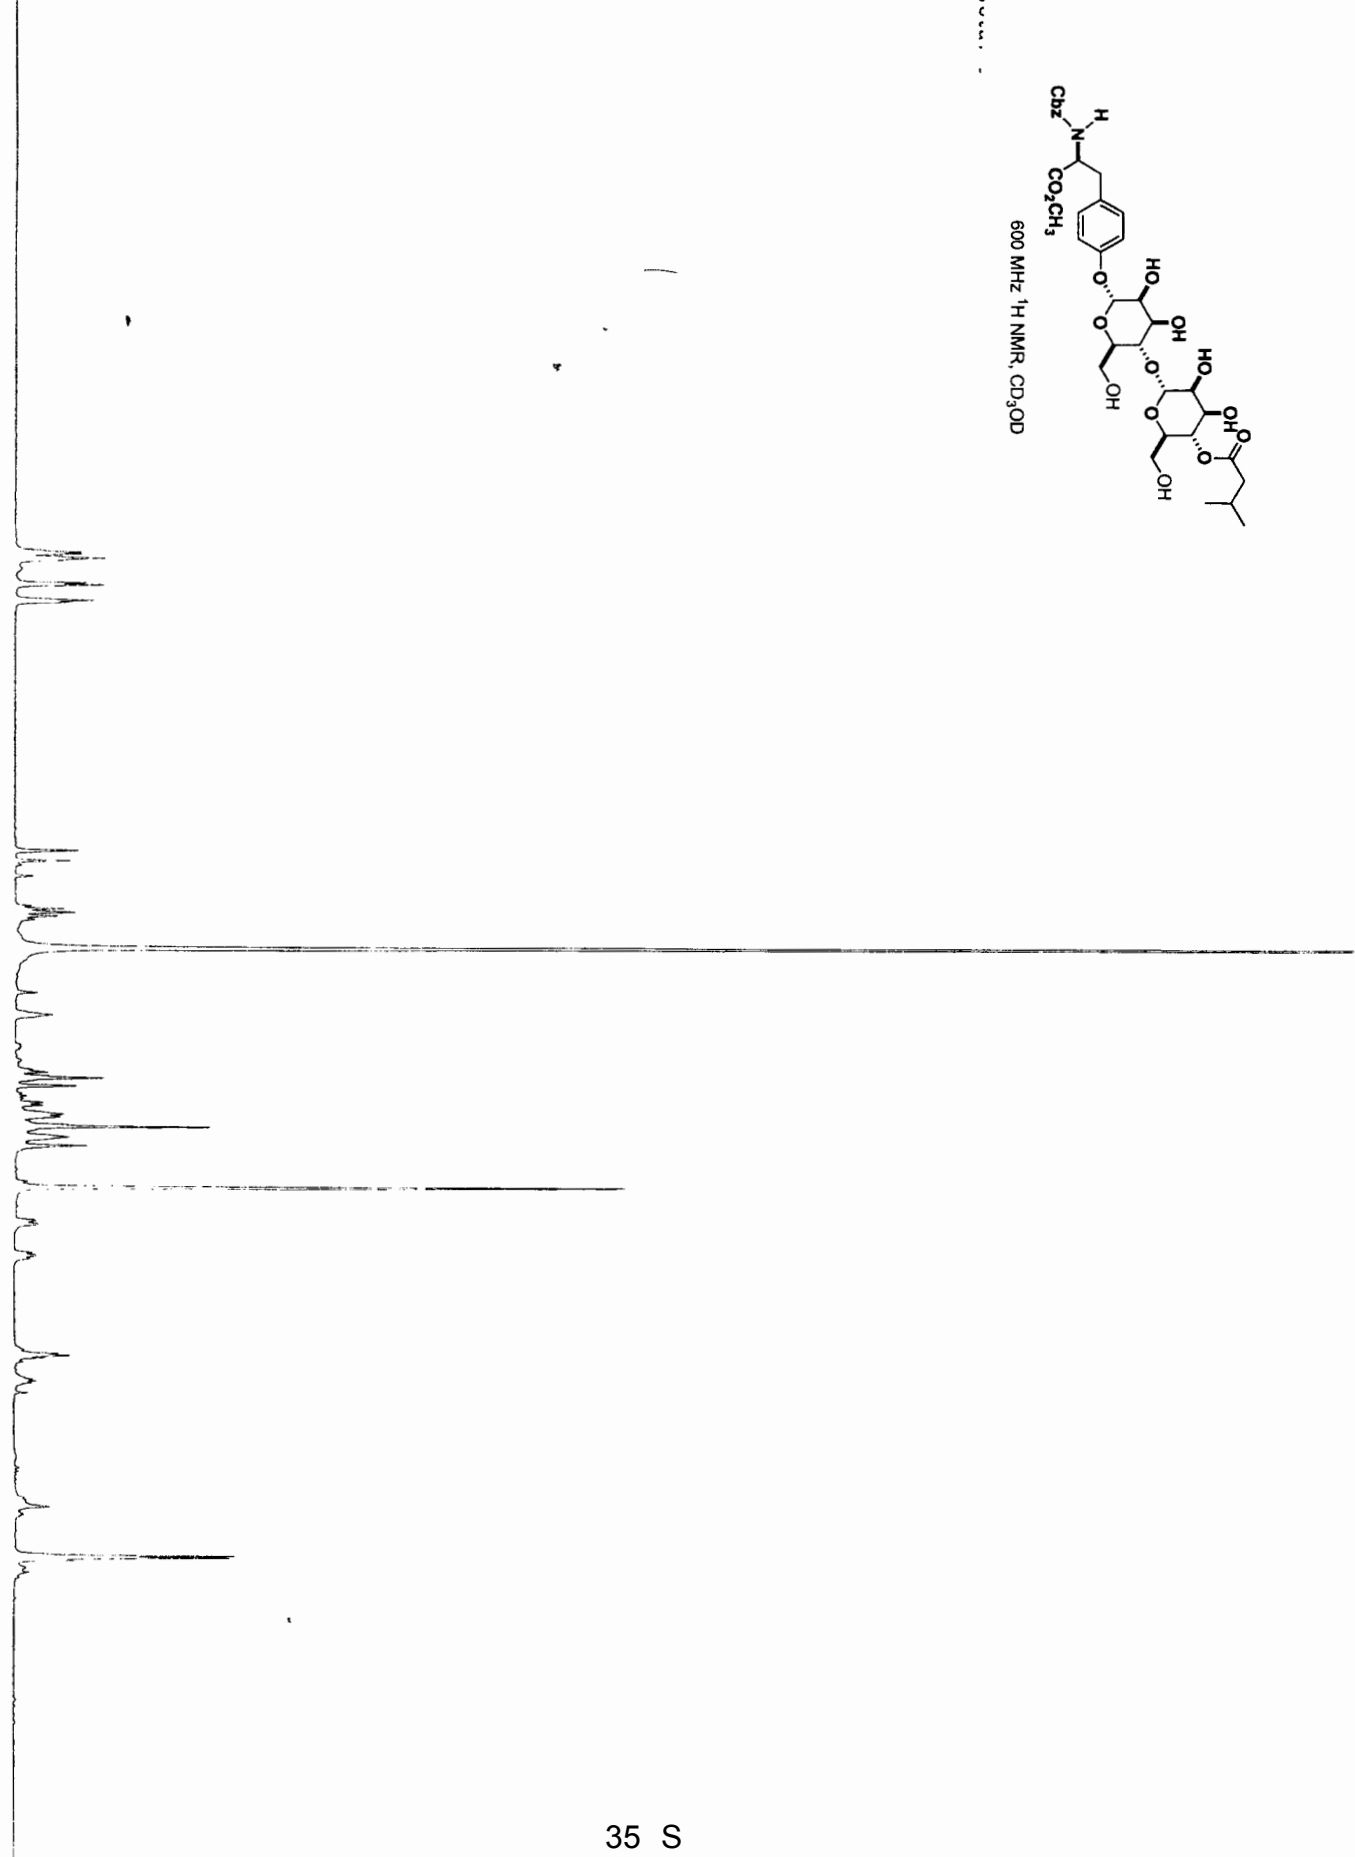

35 S

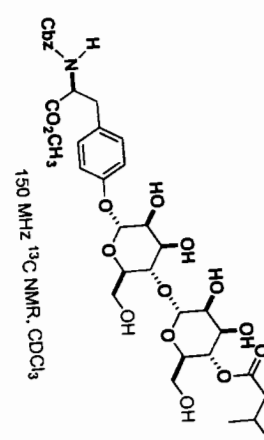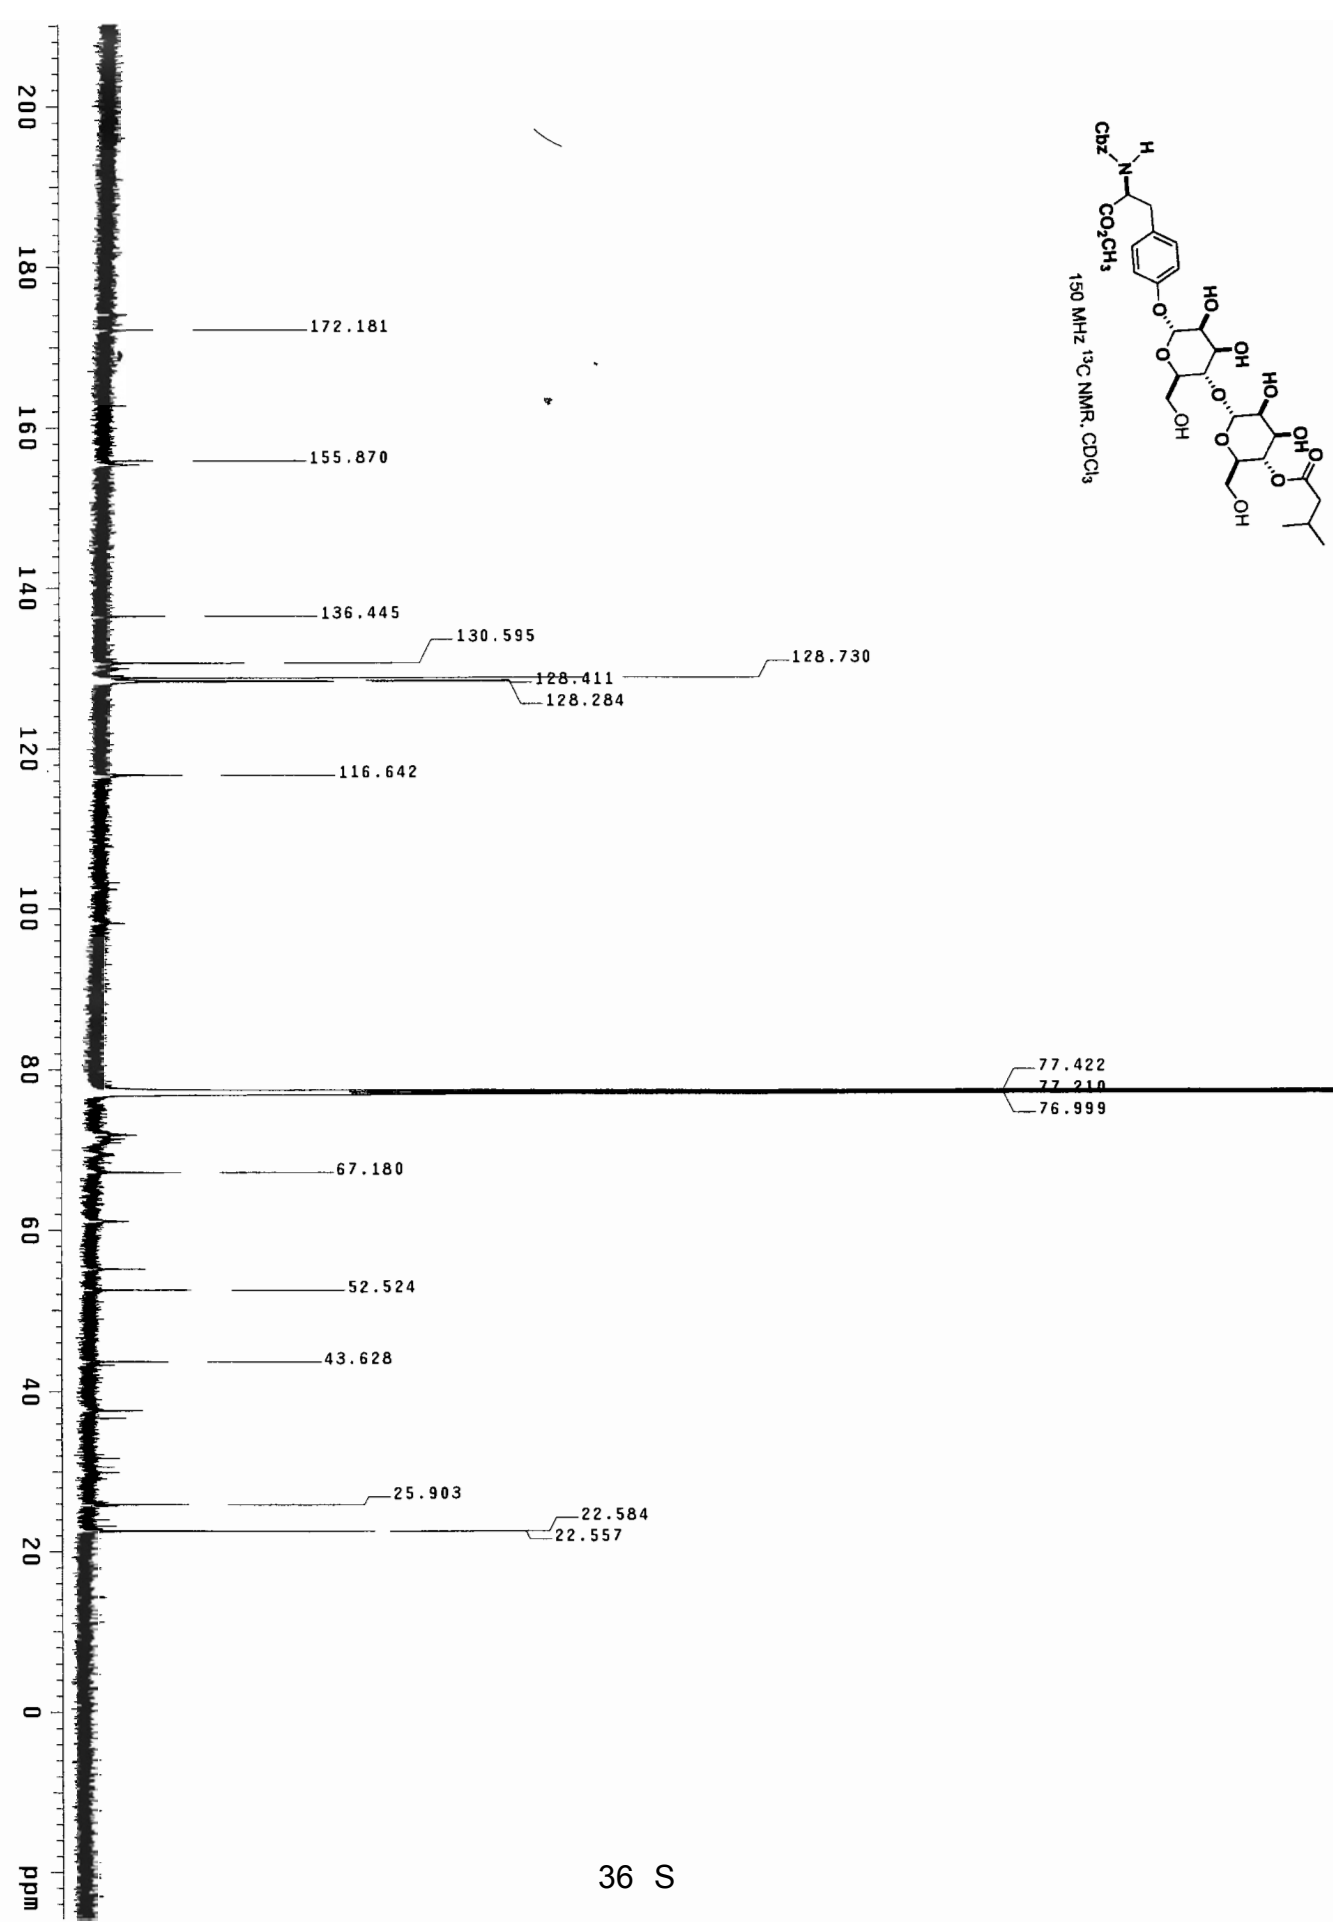

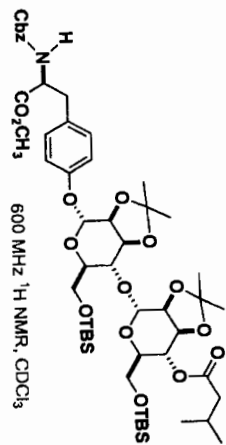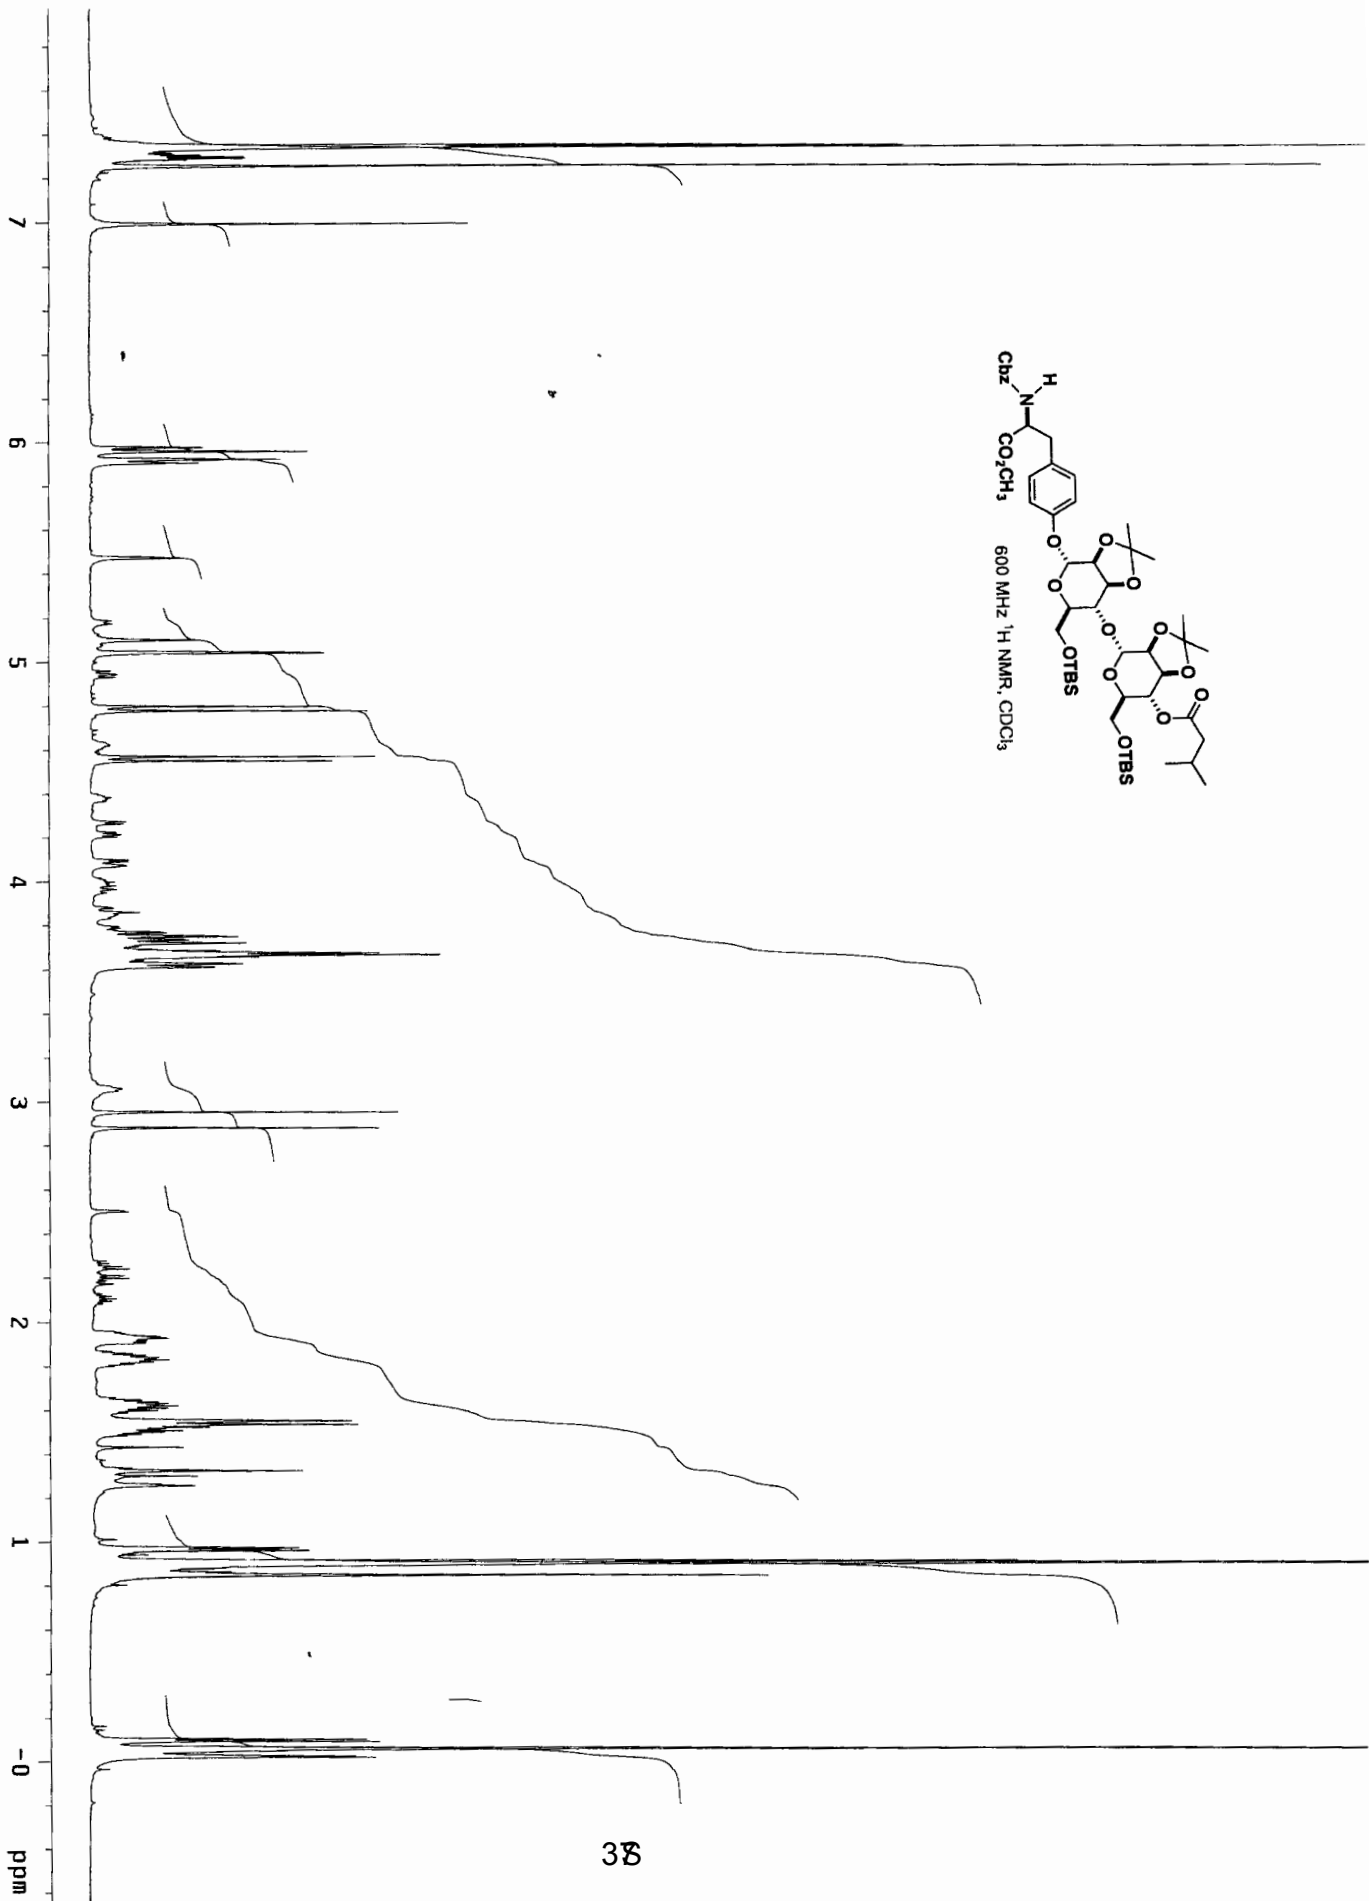



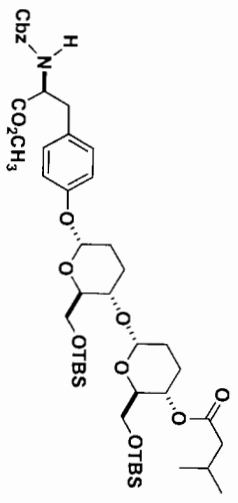

600 MHz <sup>1</sup>H NMR, CD<sub>3</sub>OD

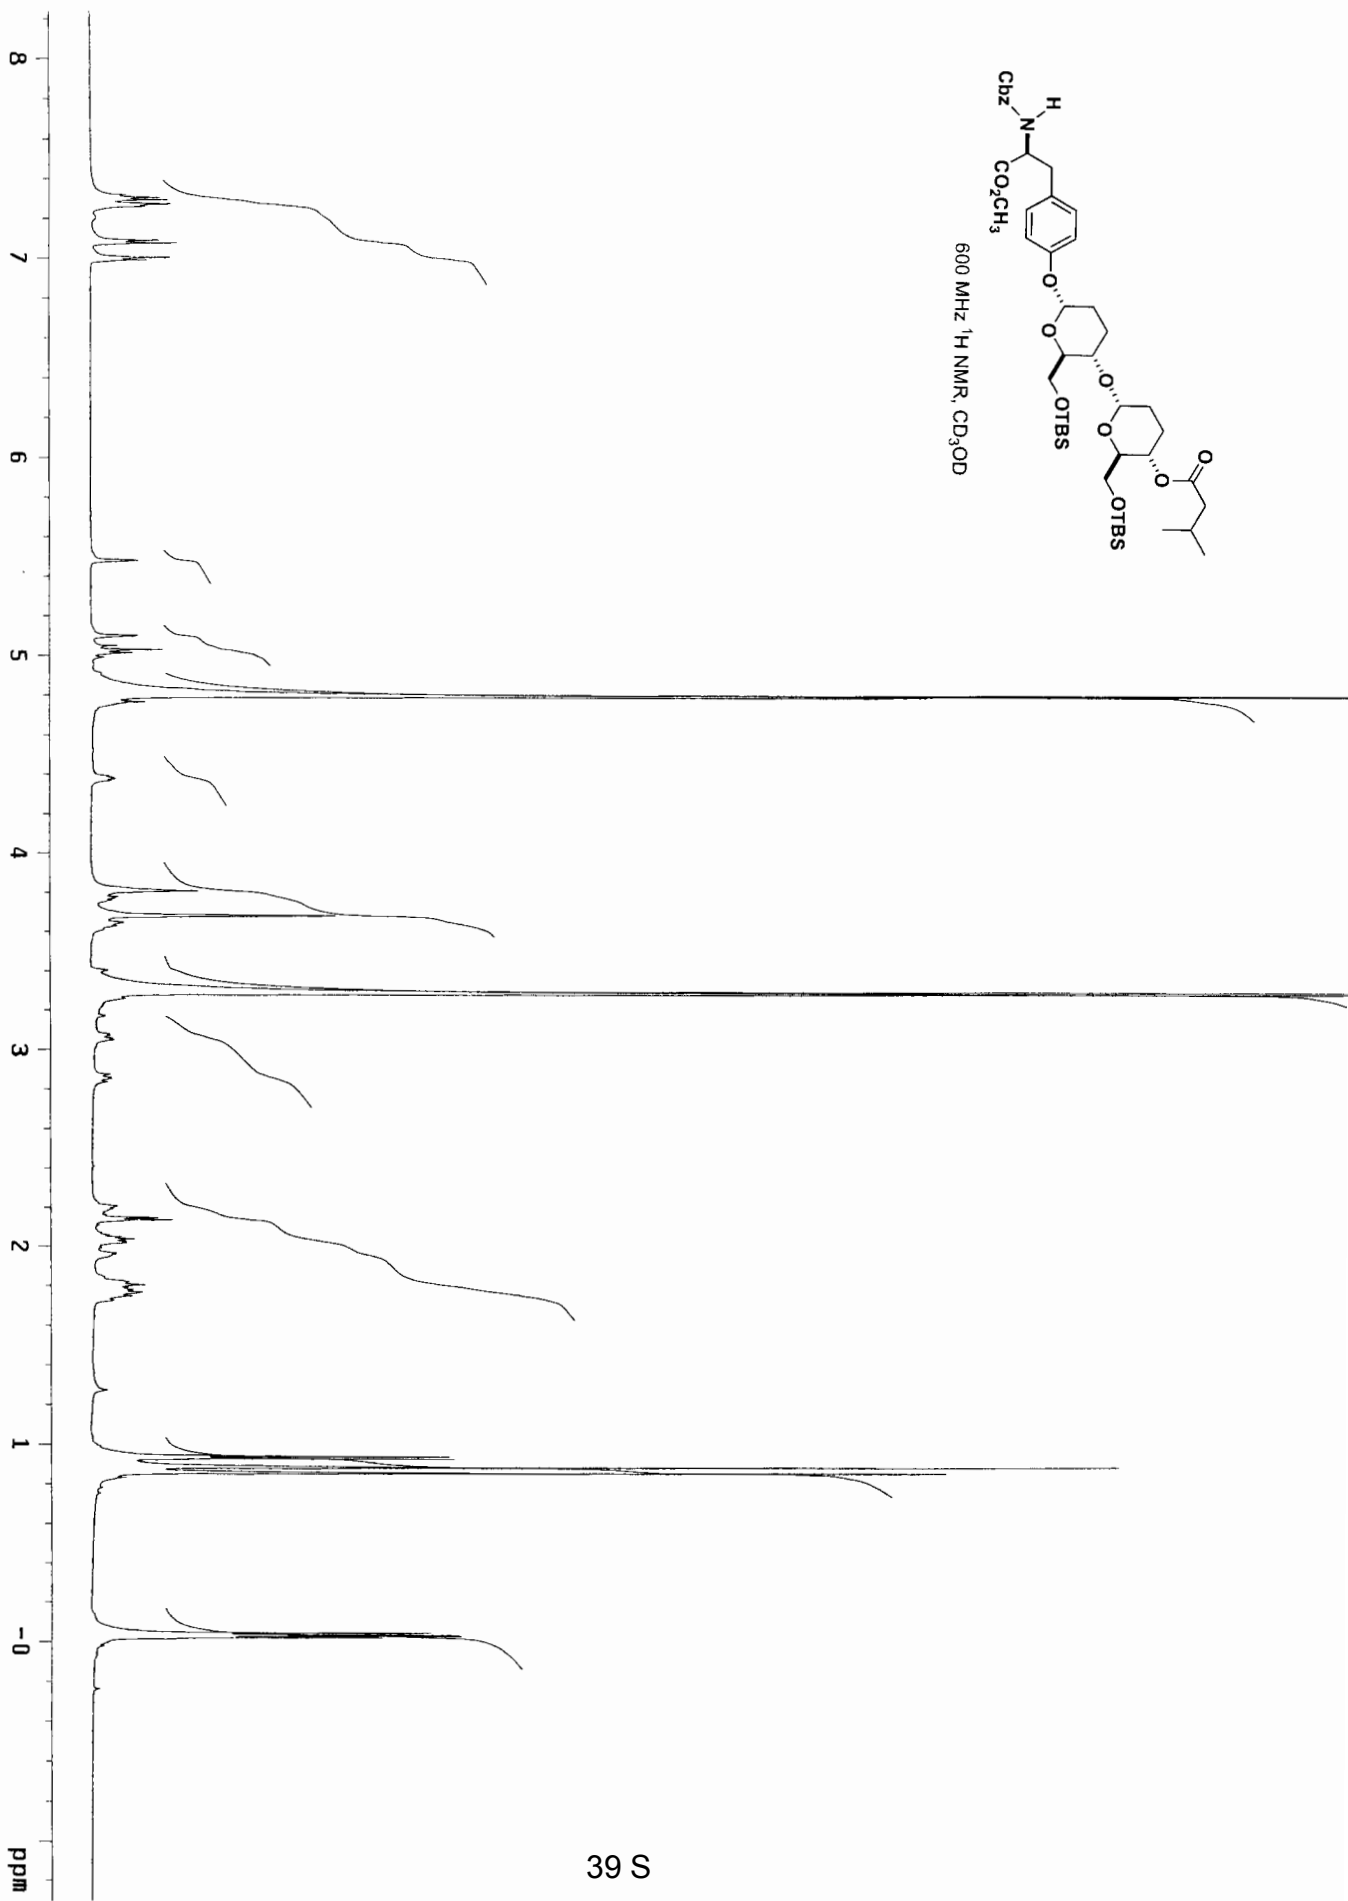

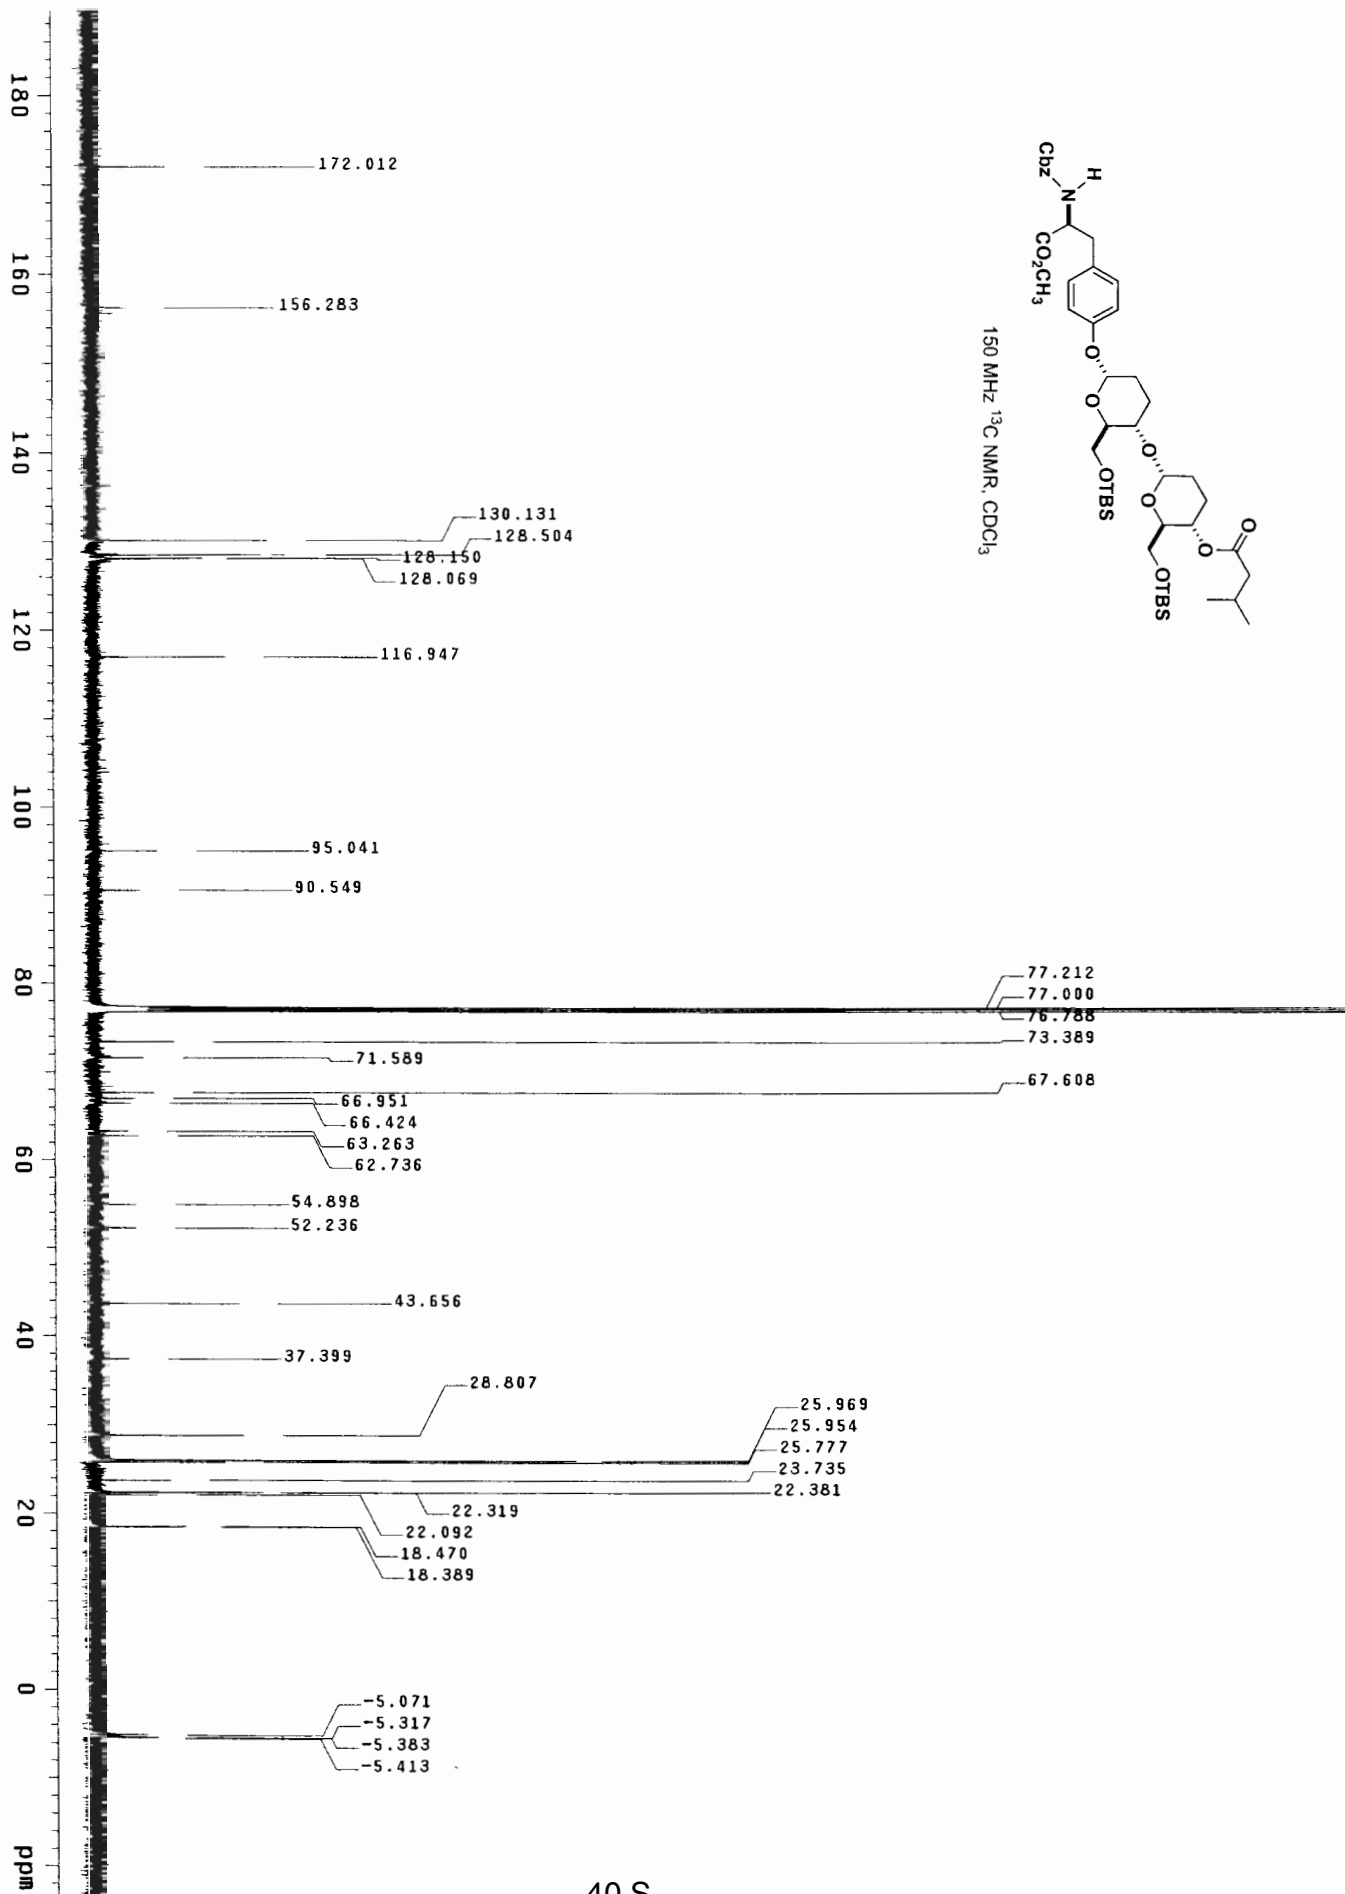



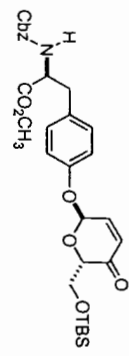

600 MHz <sup>1</sup>H NMR, CDCl<sub>3</sub>

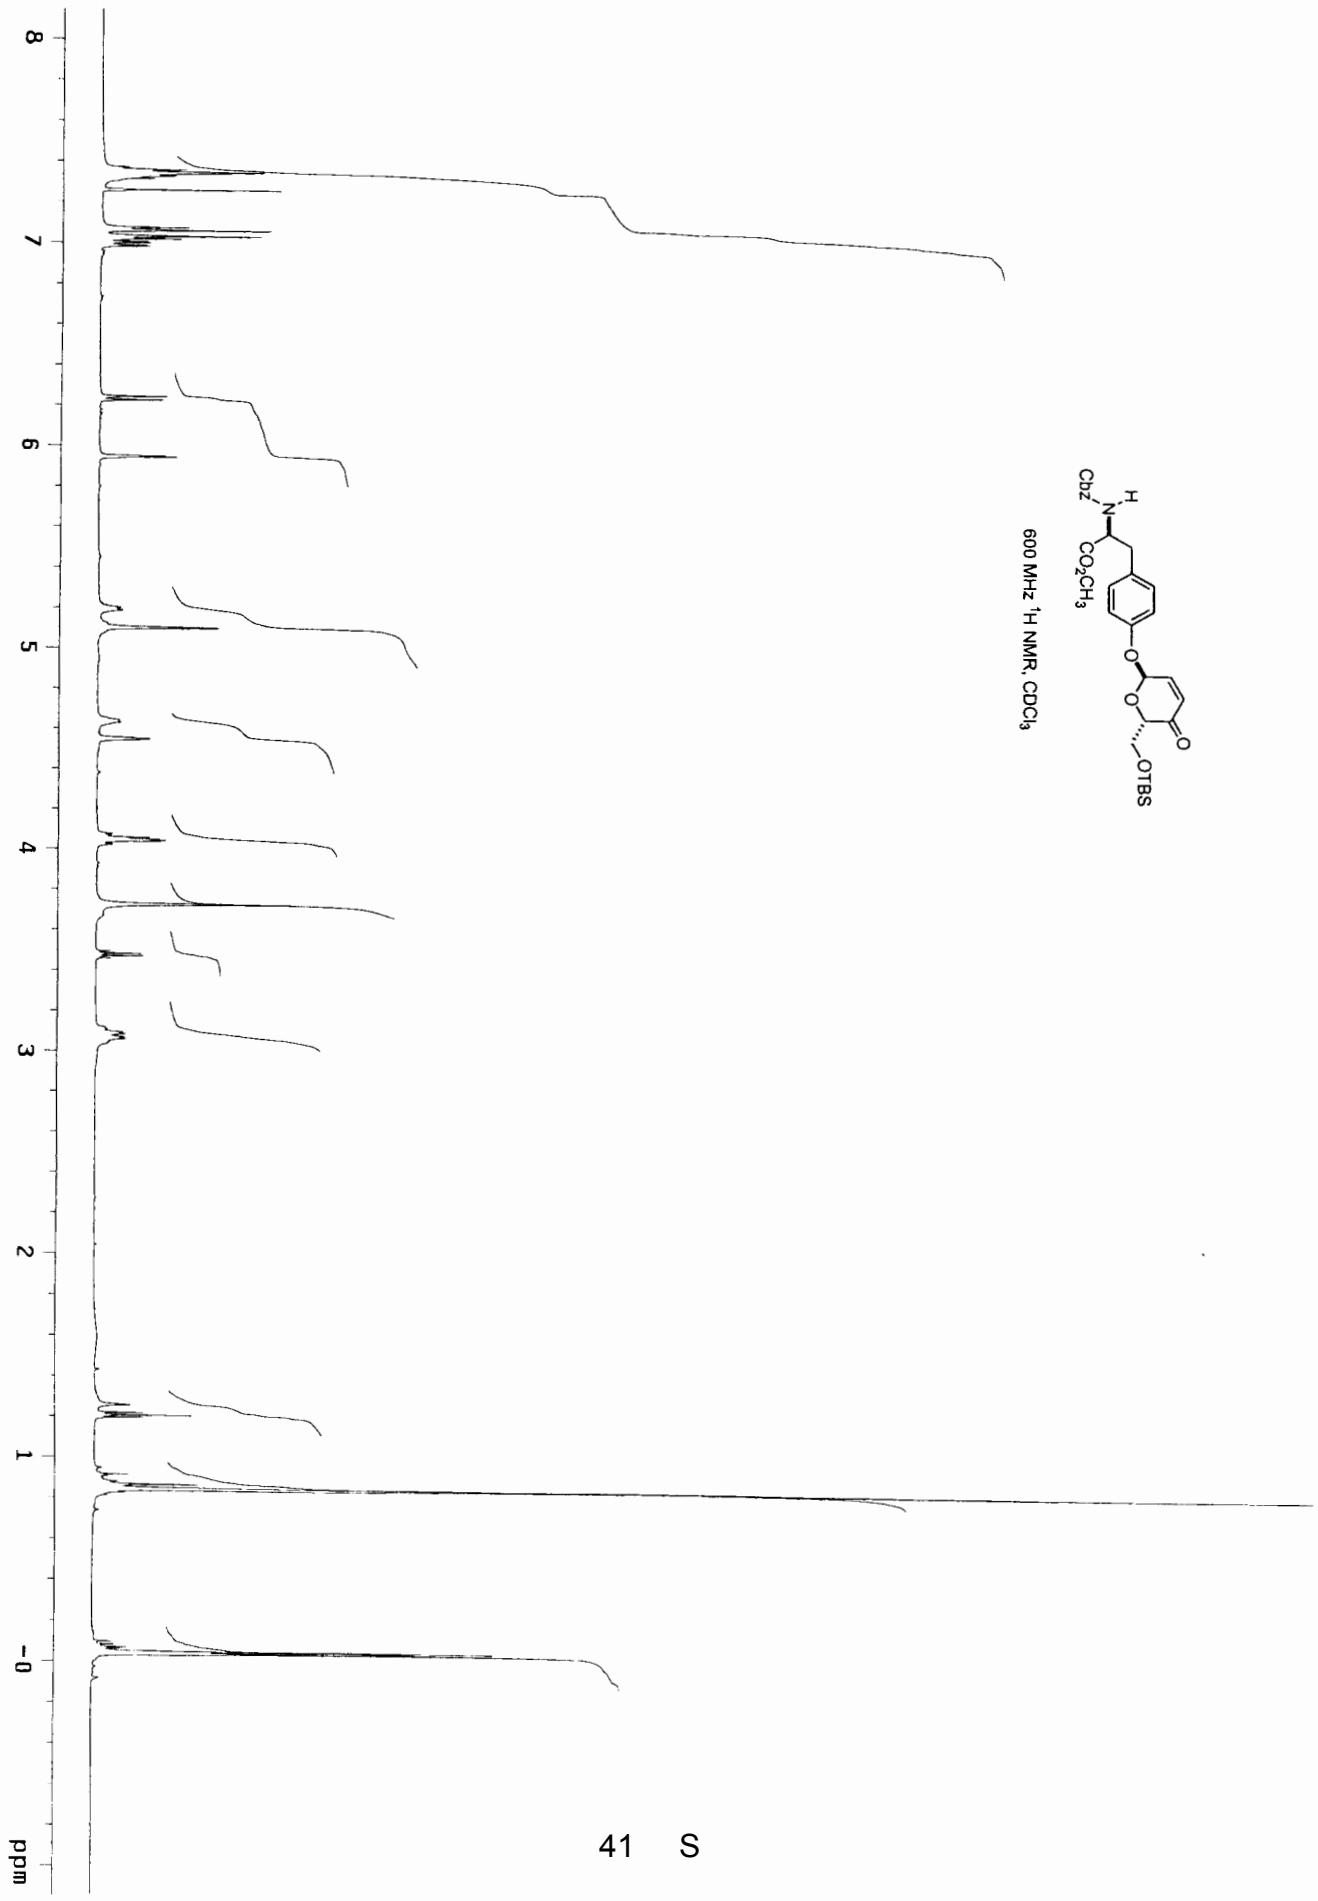

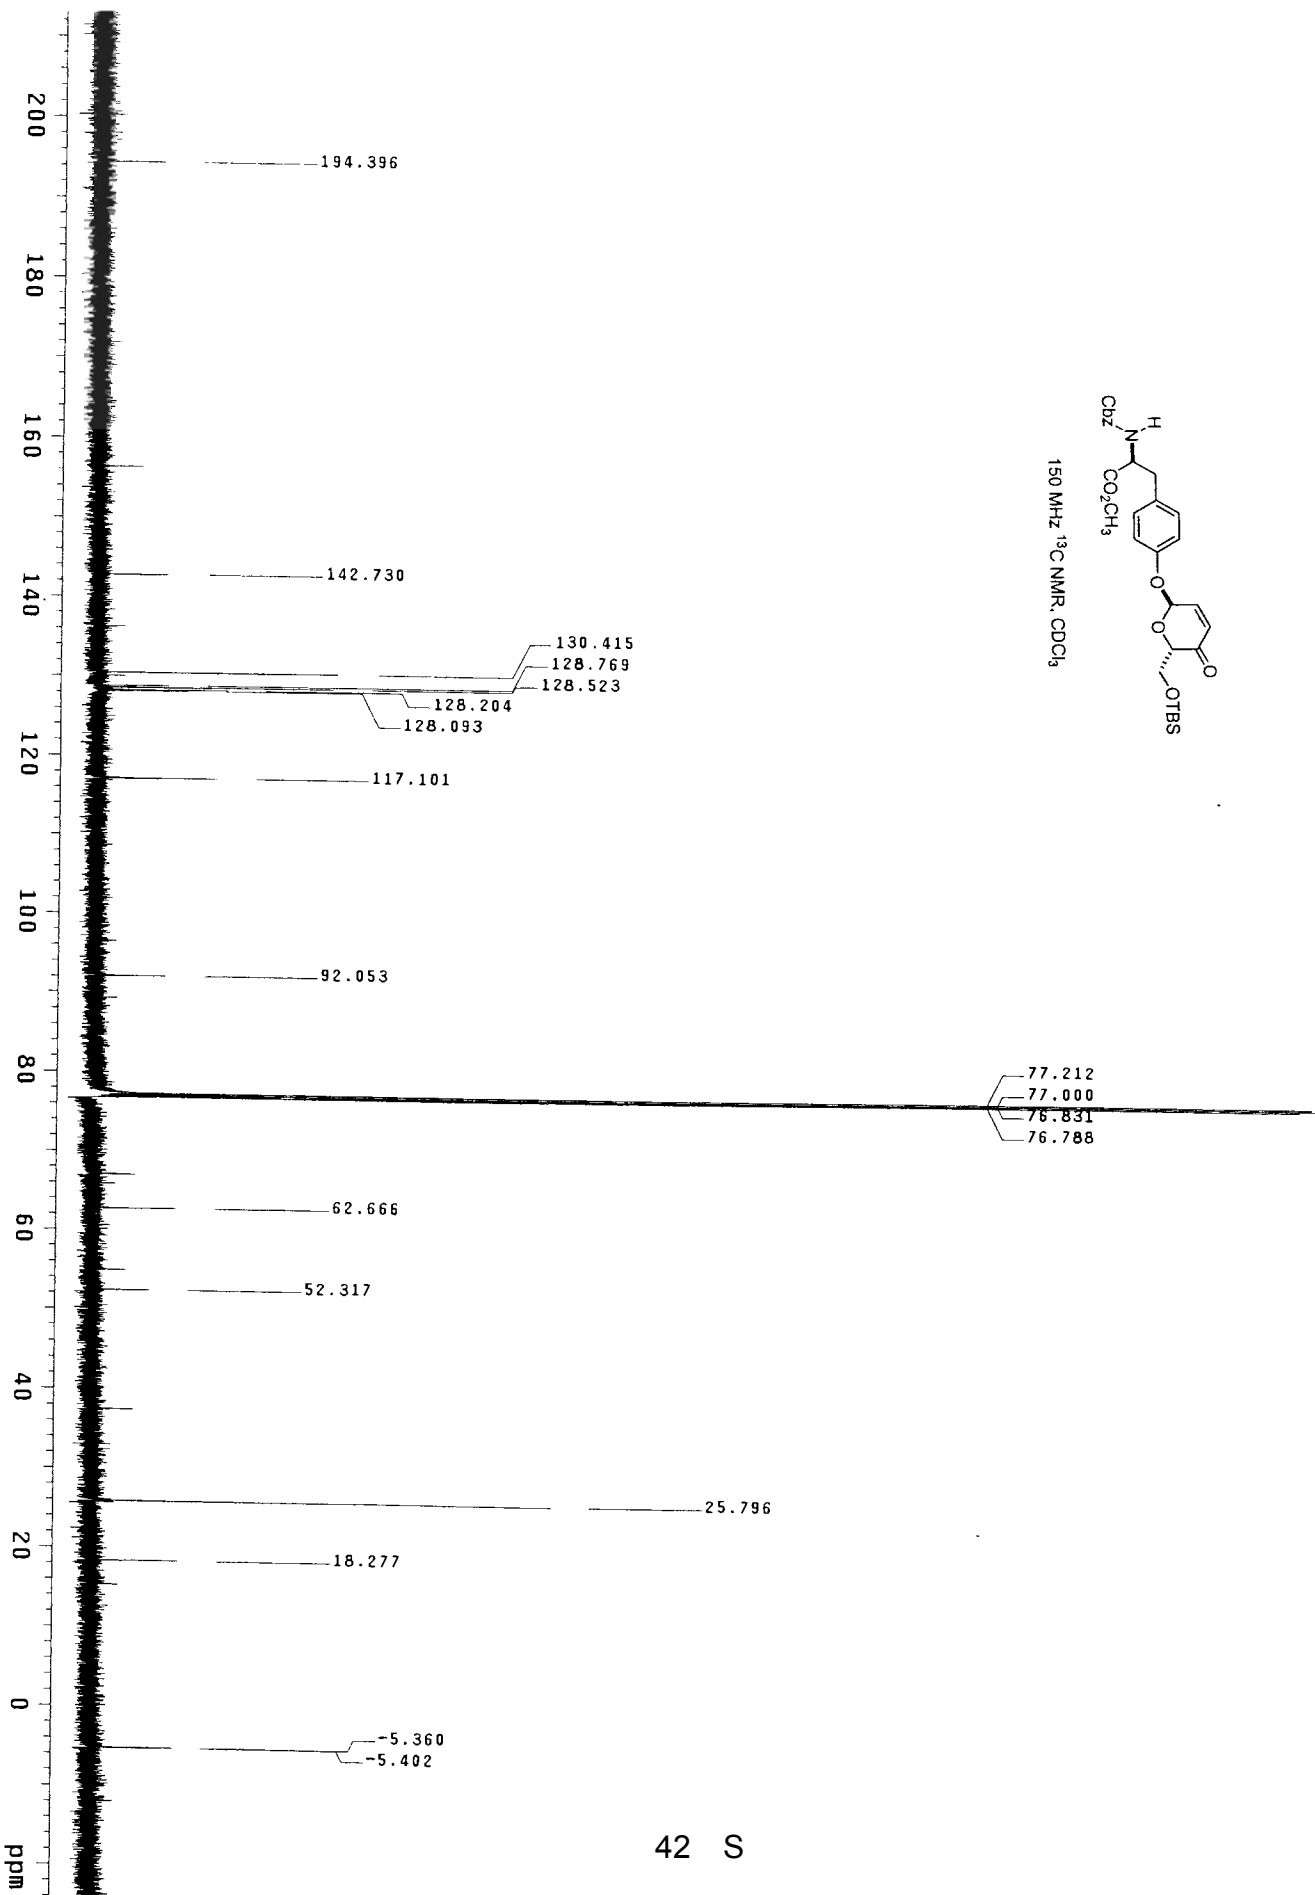

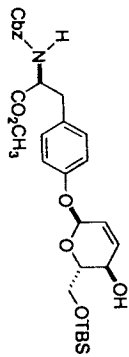

600 MHz <sup>1</sup>H NMR, CDCl<sub>3</sub>

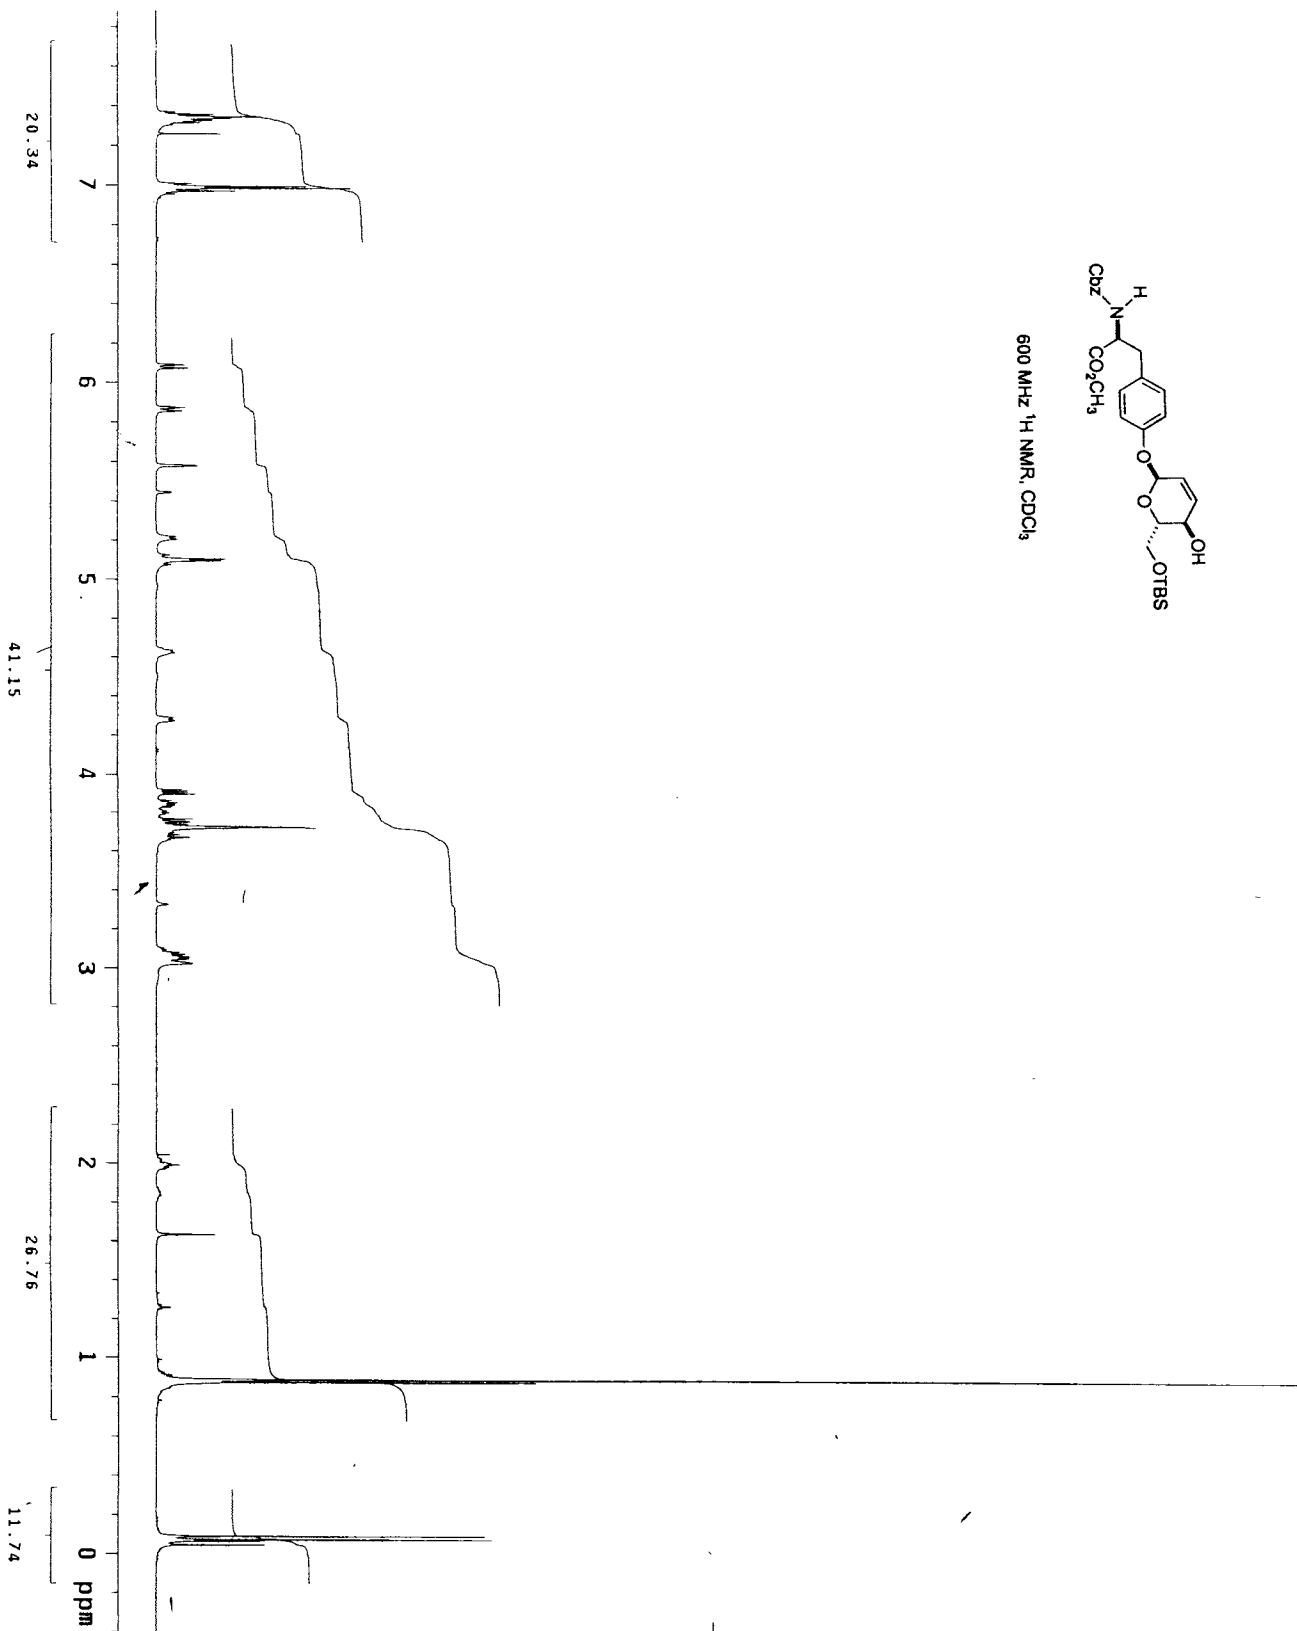

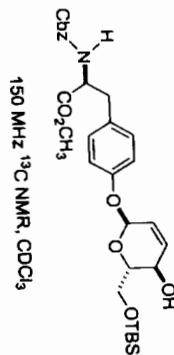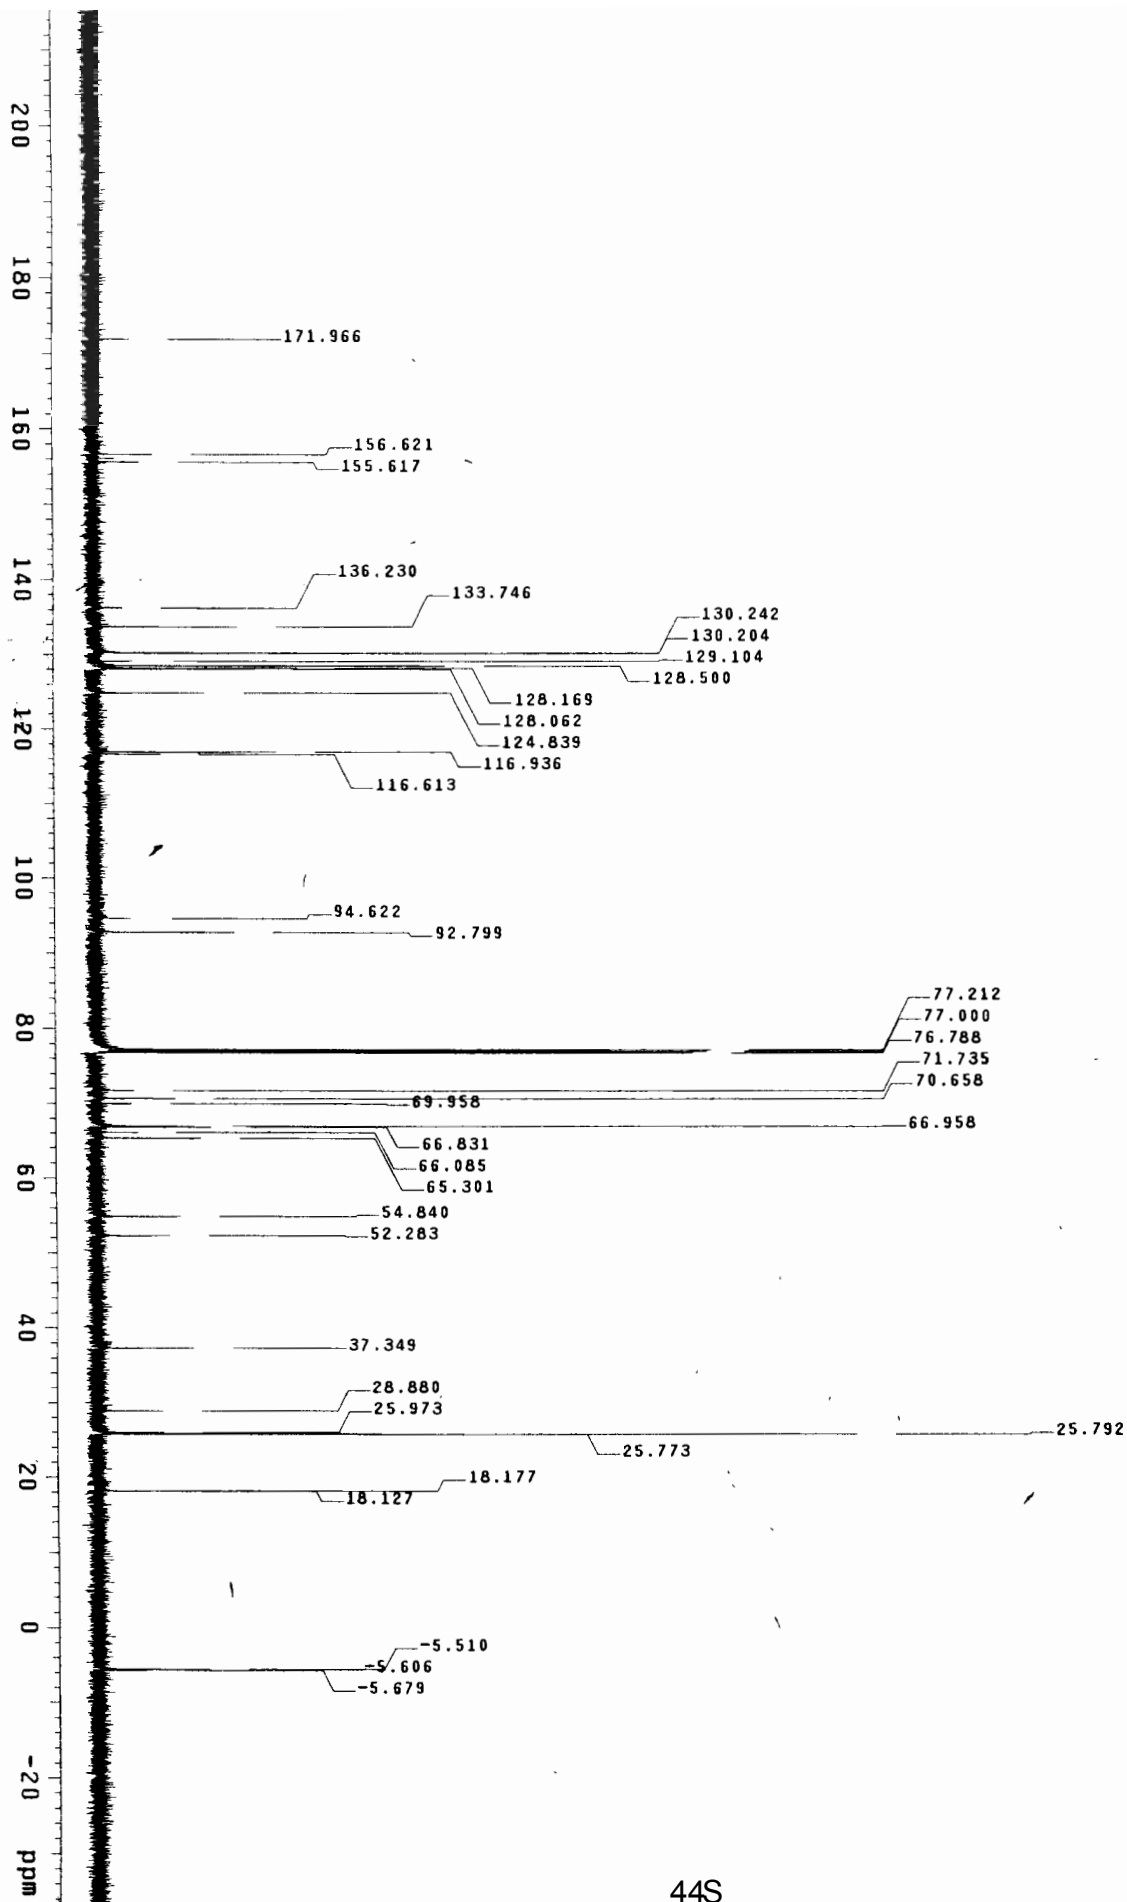

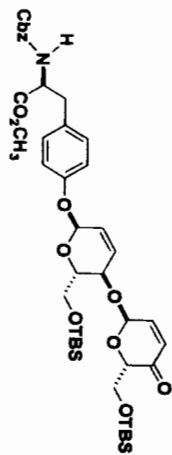

600 MHz <sup>1</sup>H NMR, CDCl<sub>3</sub>

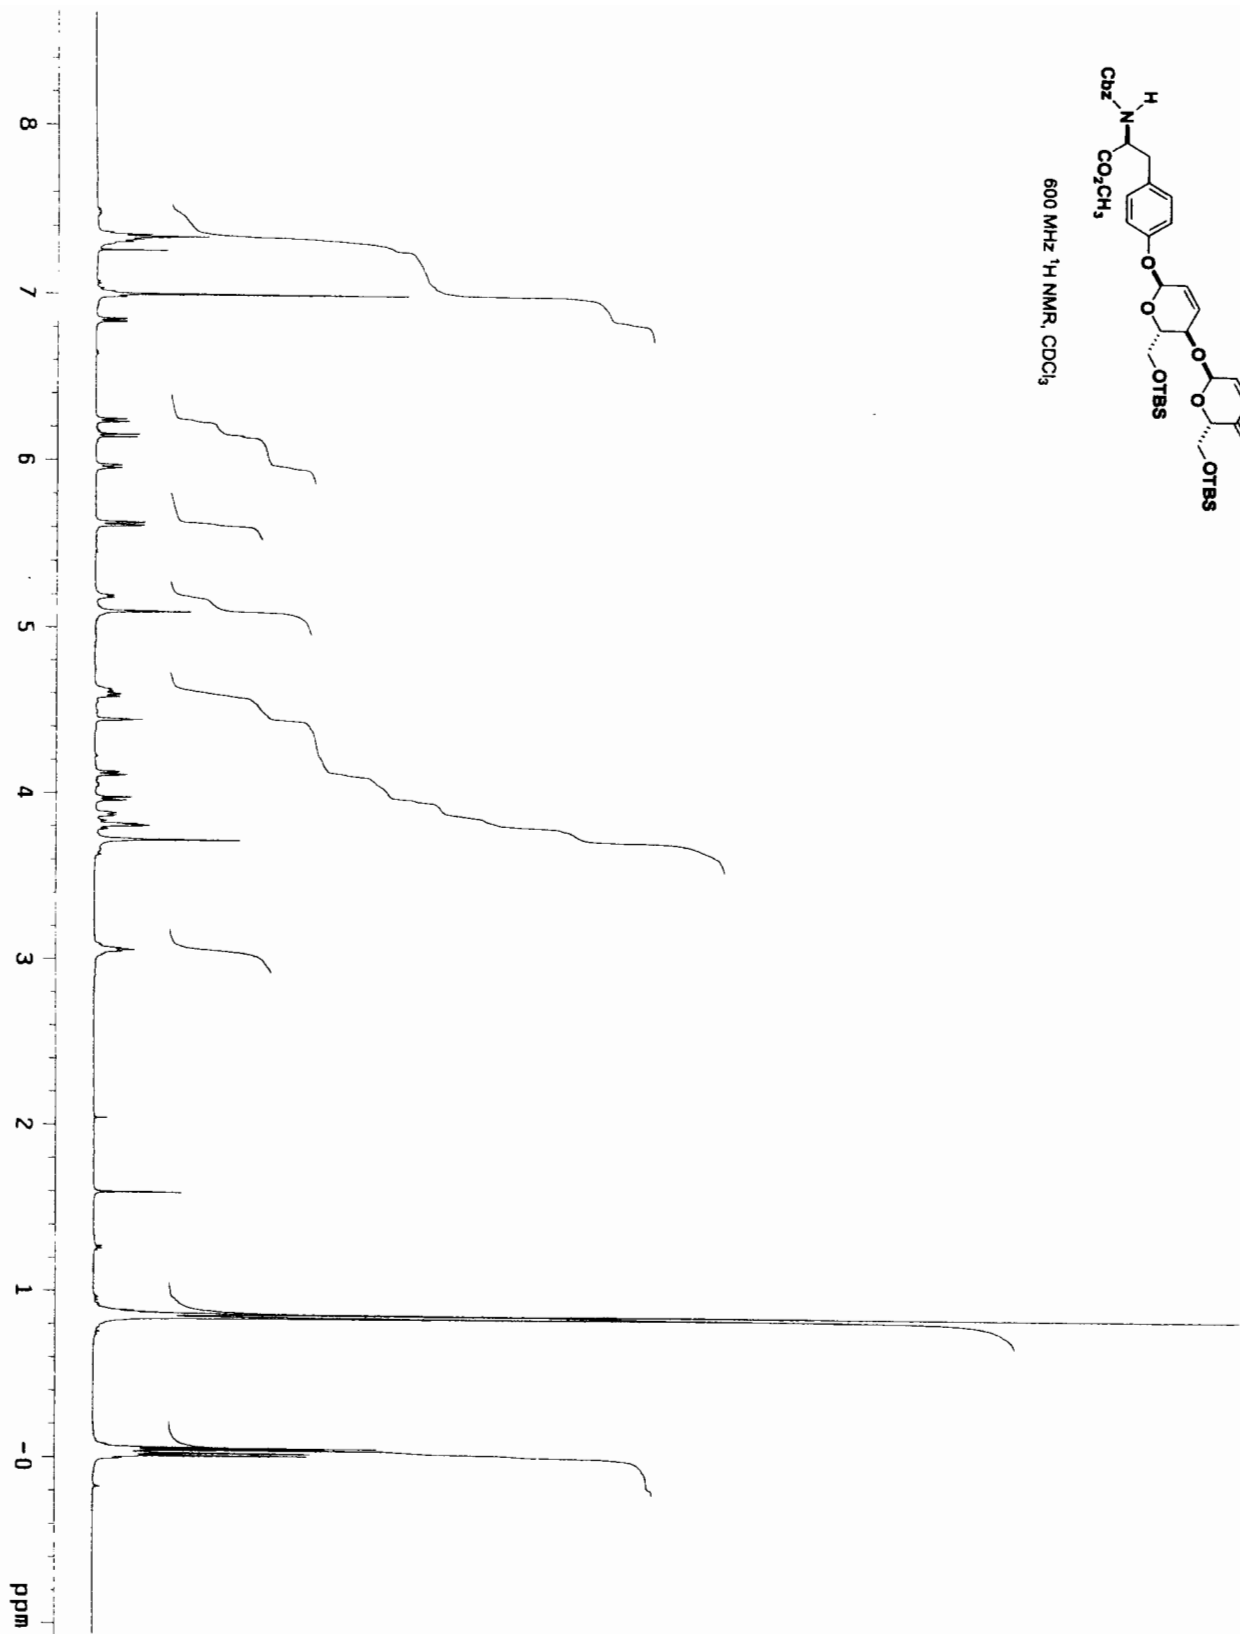

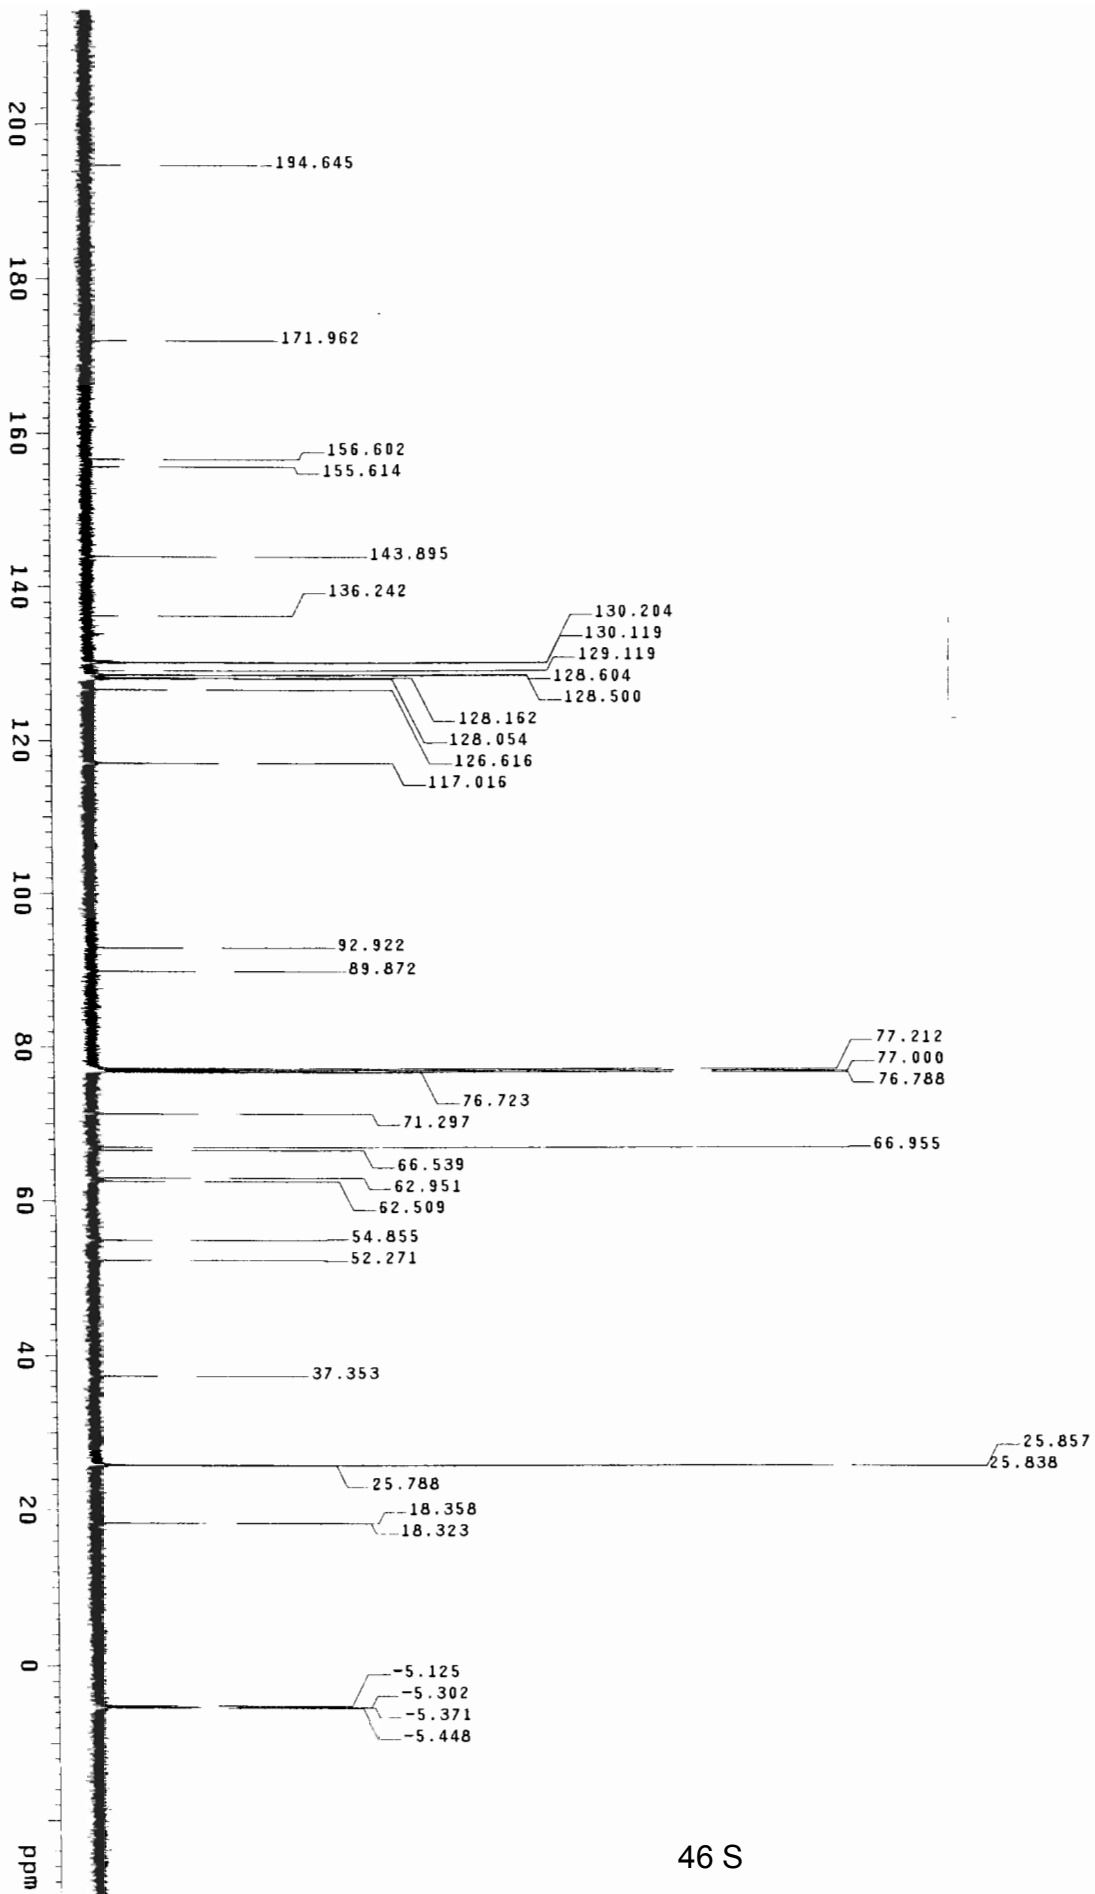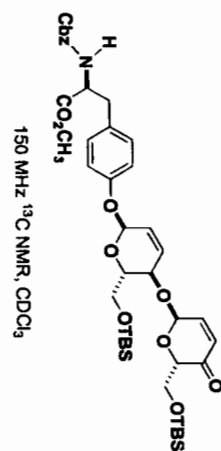

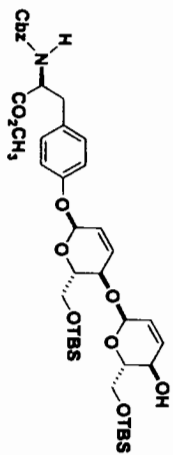

600 MHz <sup>1</sup>H NMR, CDCl<sub>3</sub>

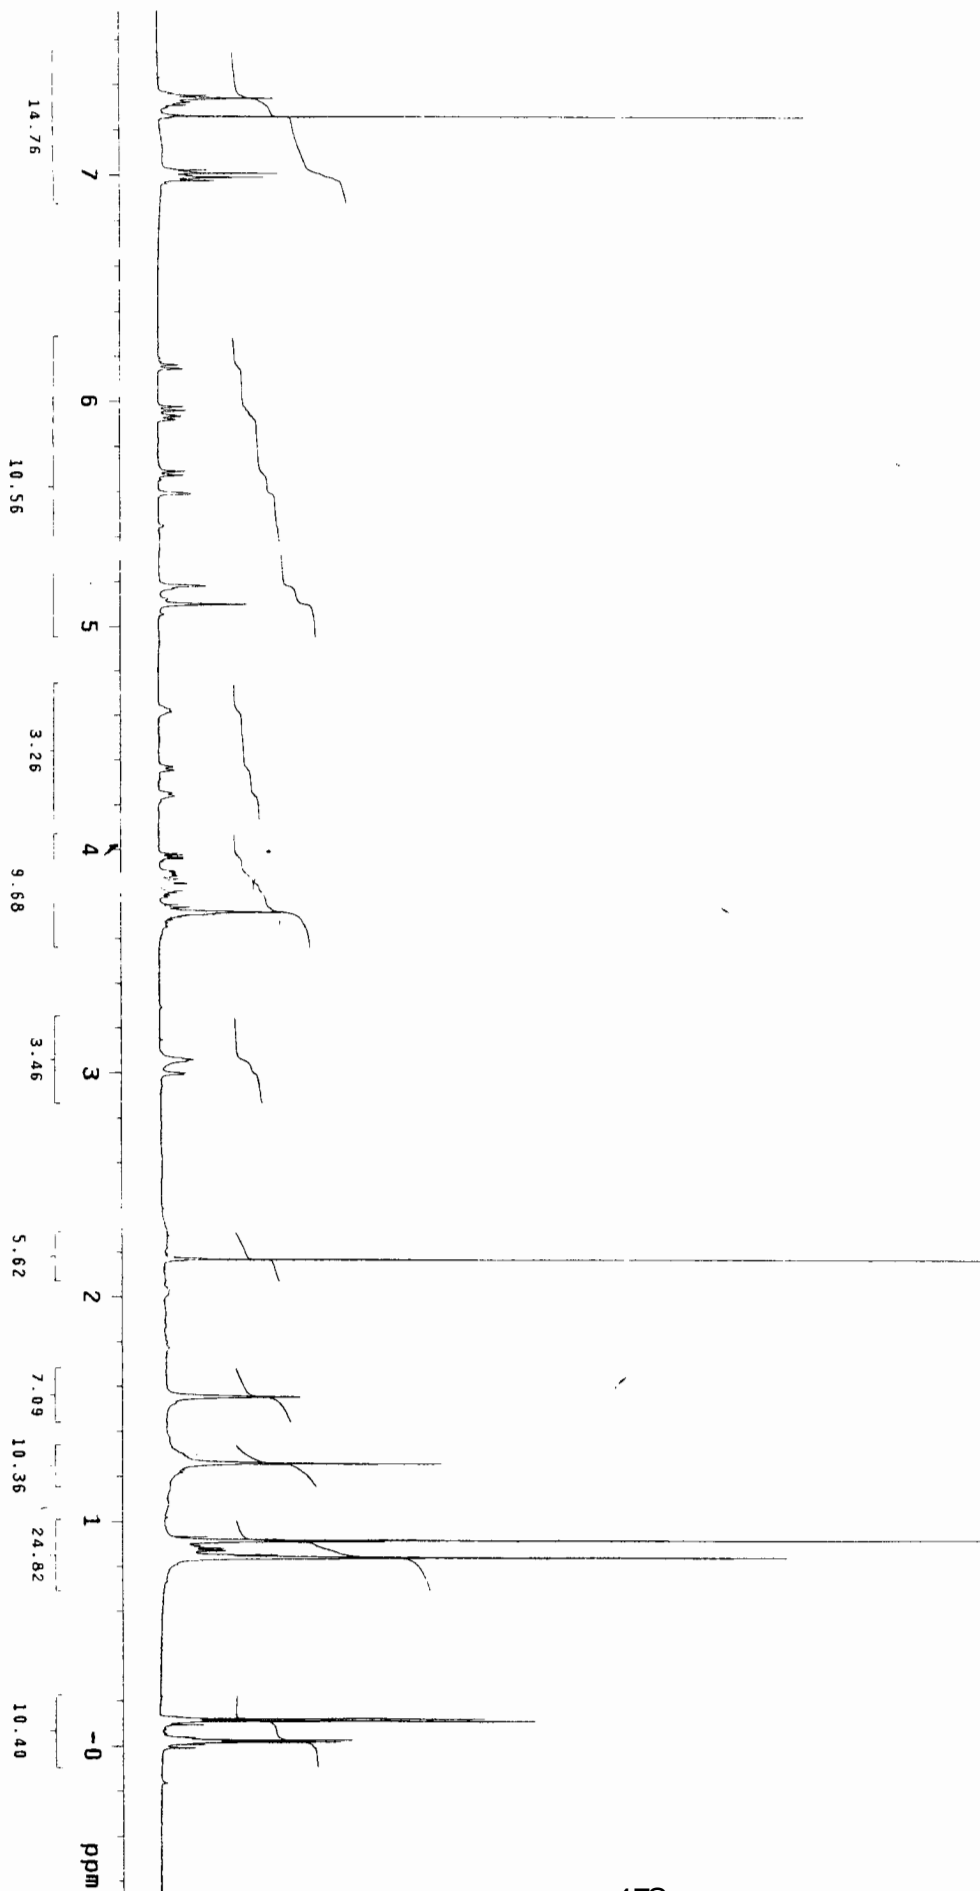

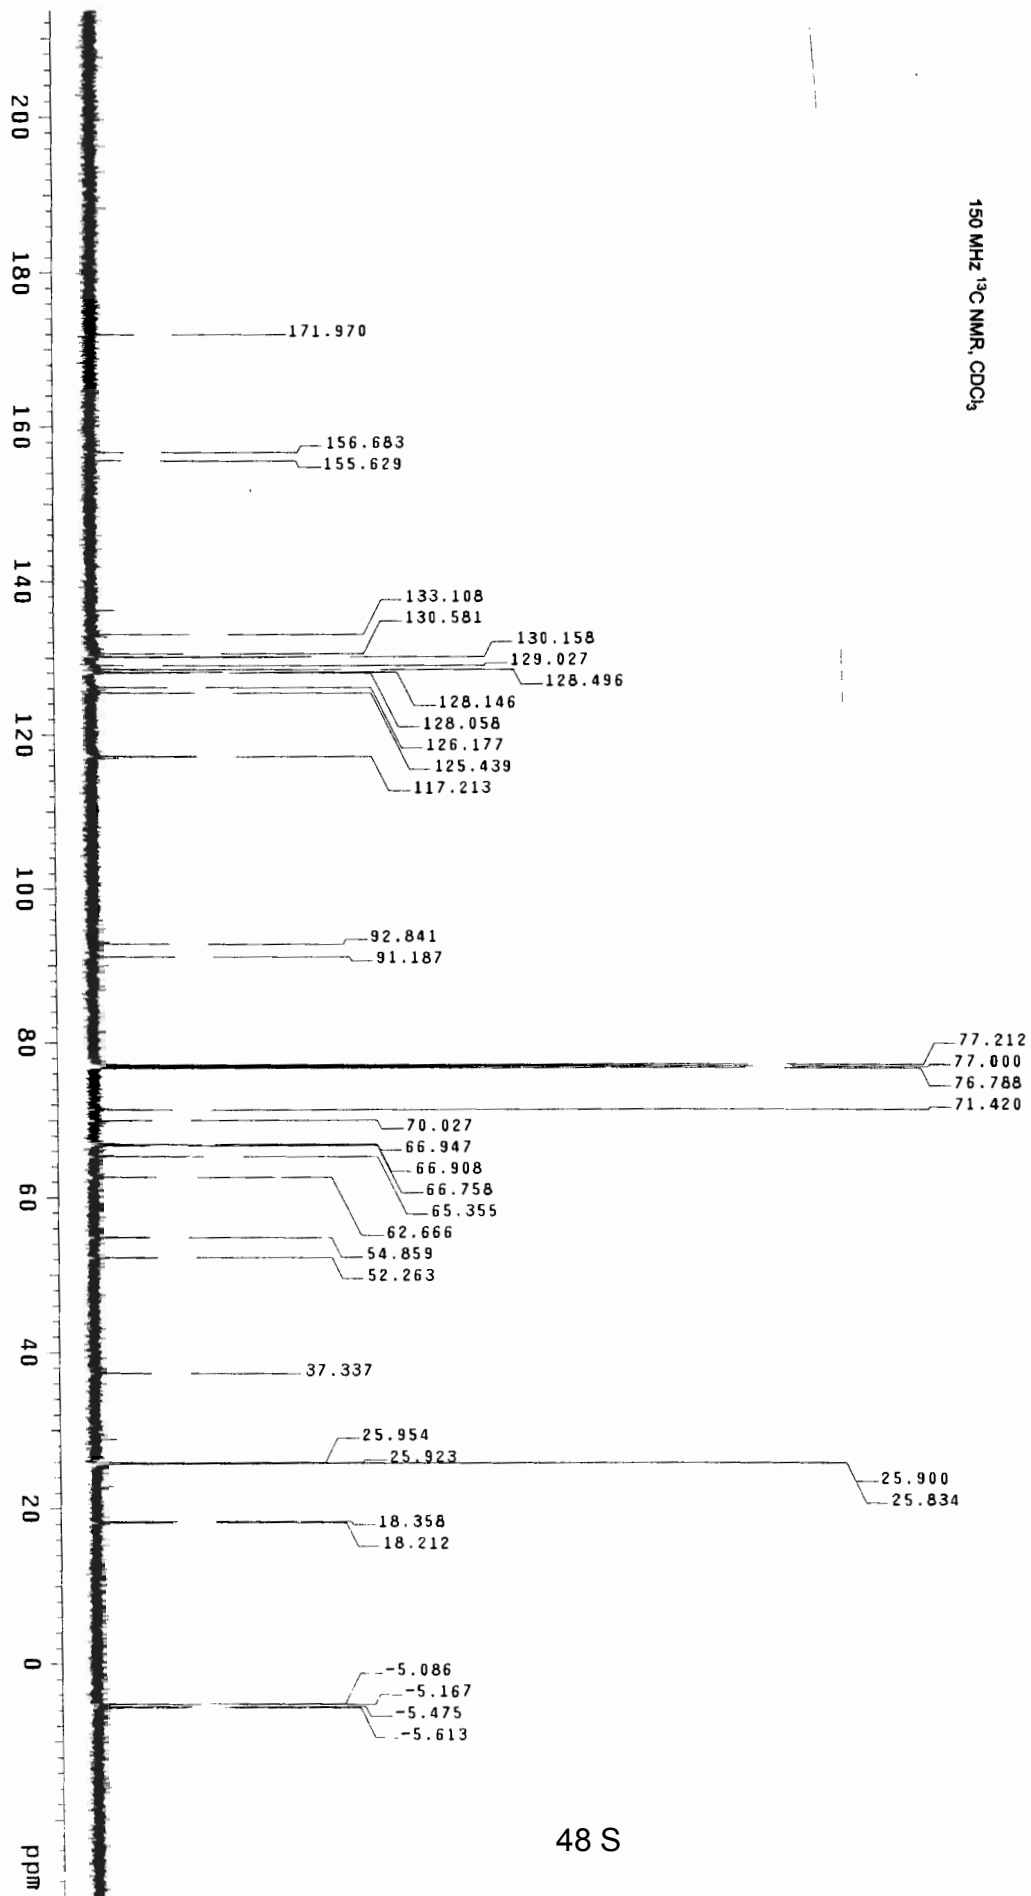



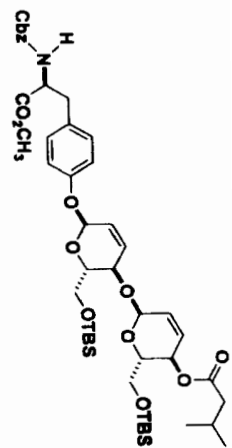

600 MHz <sup>1</sup>H NMR, CDCl<sub>3</sub>

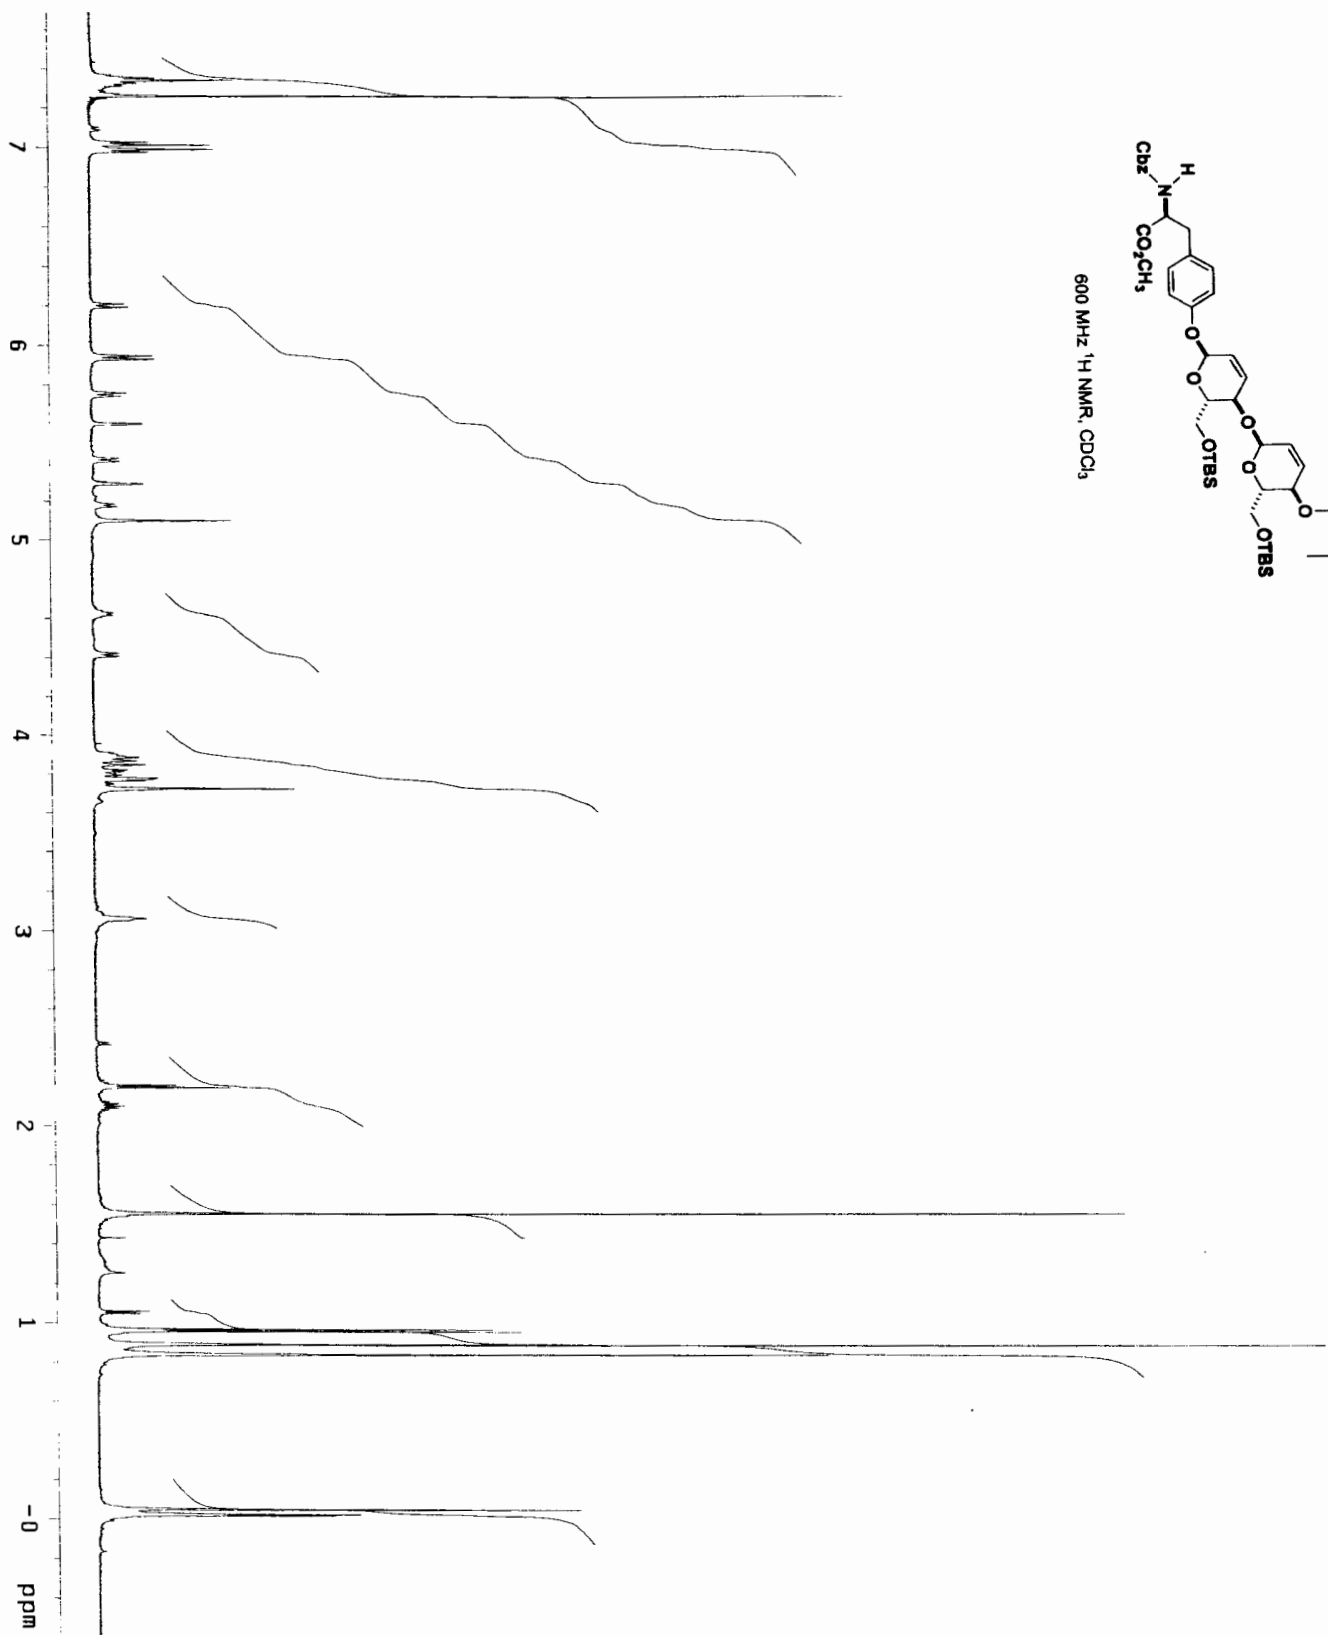

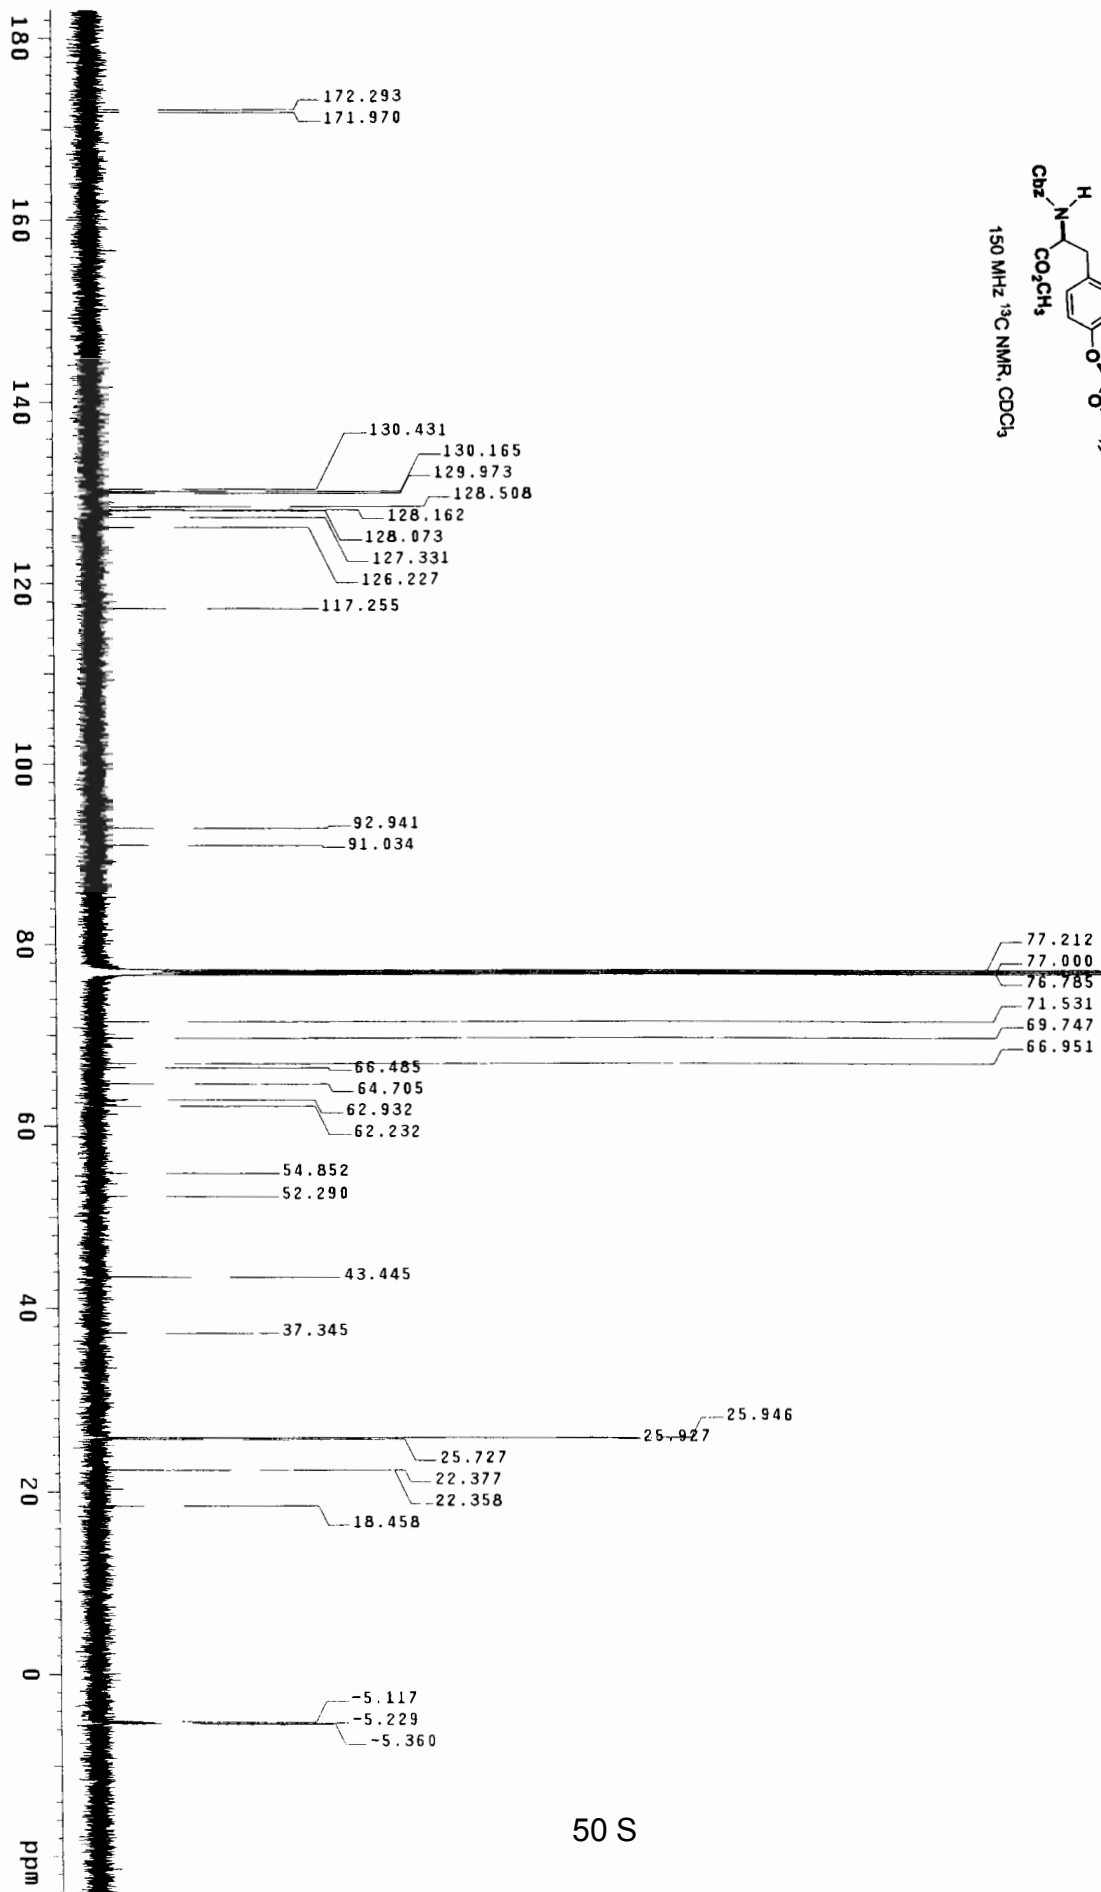

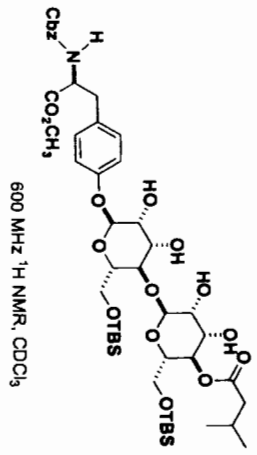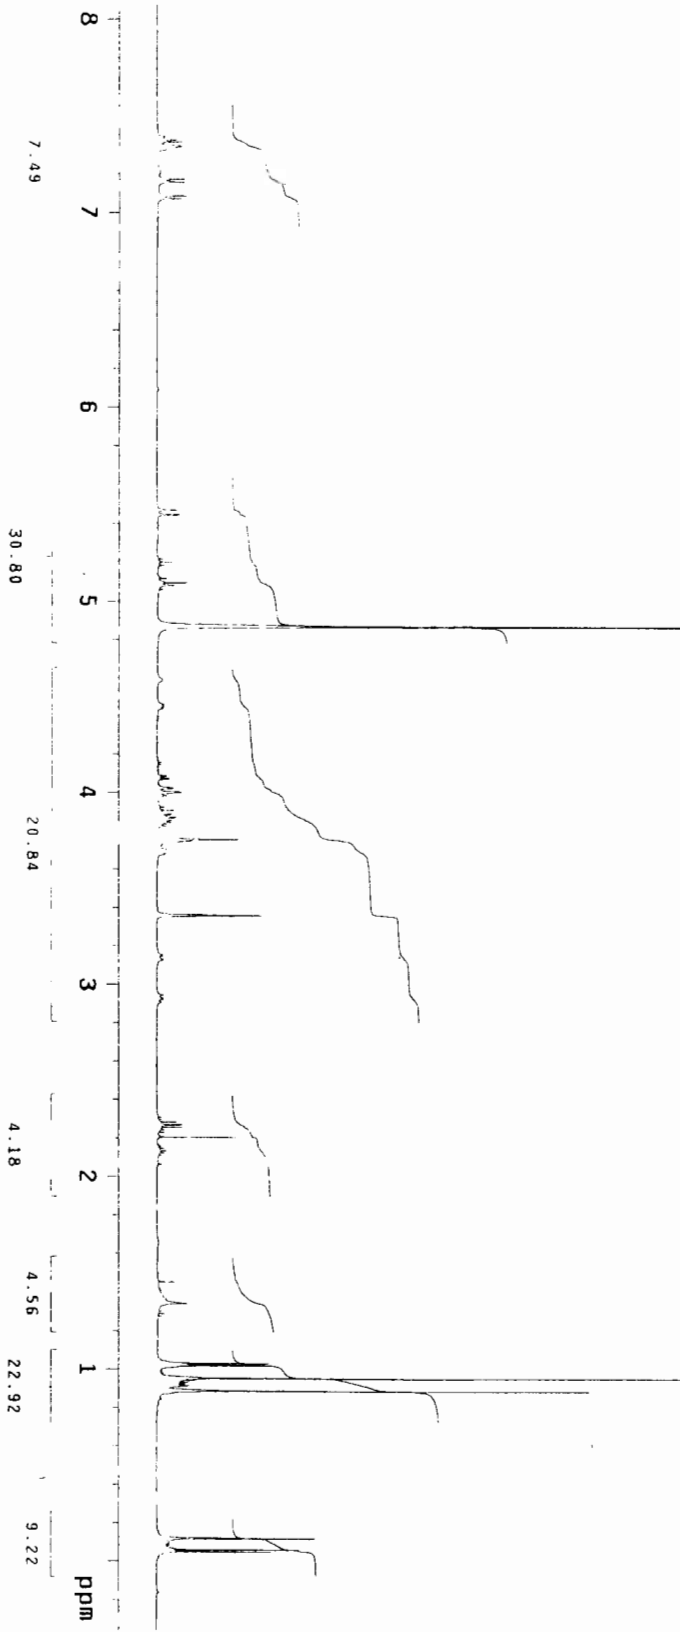

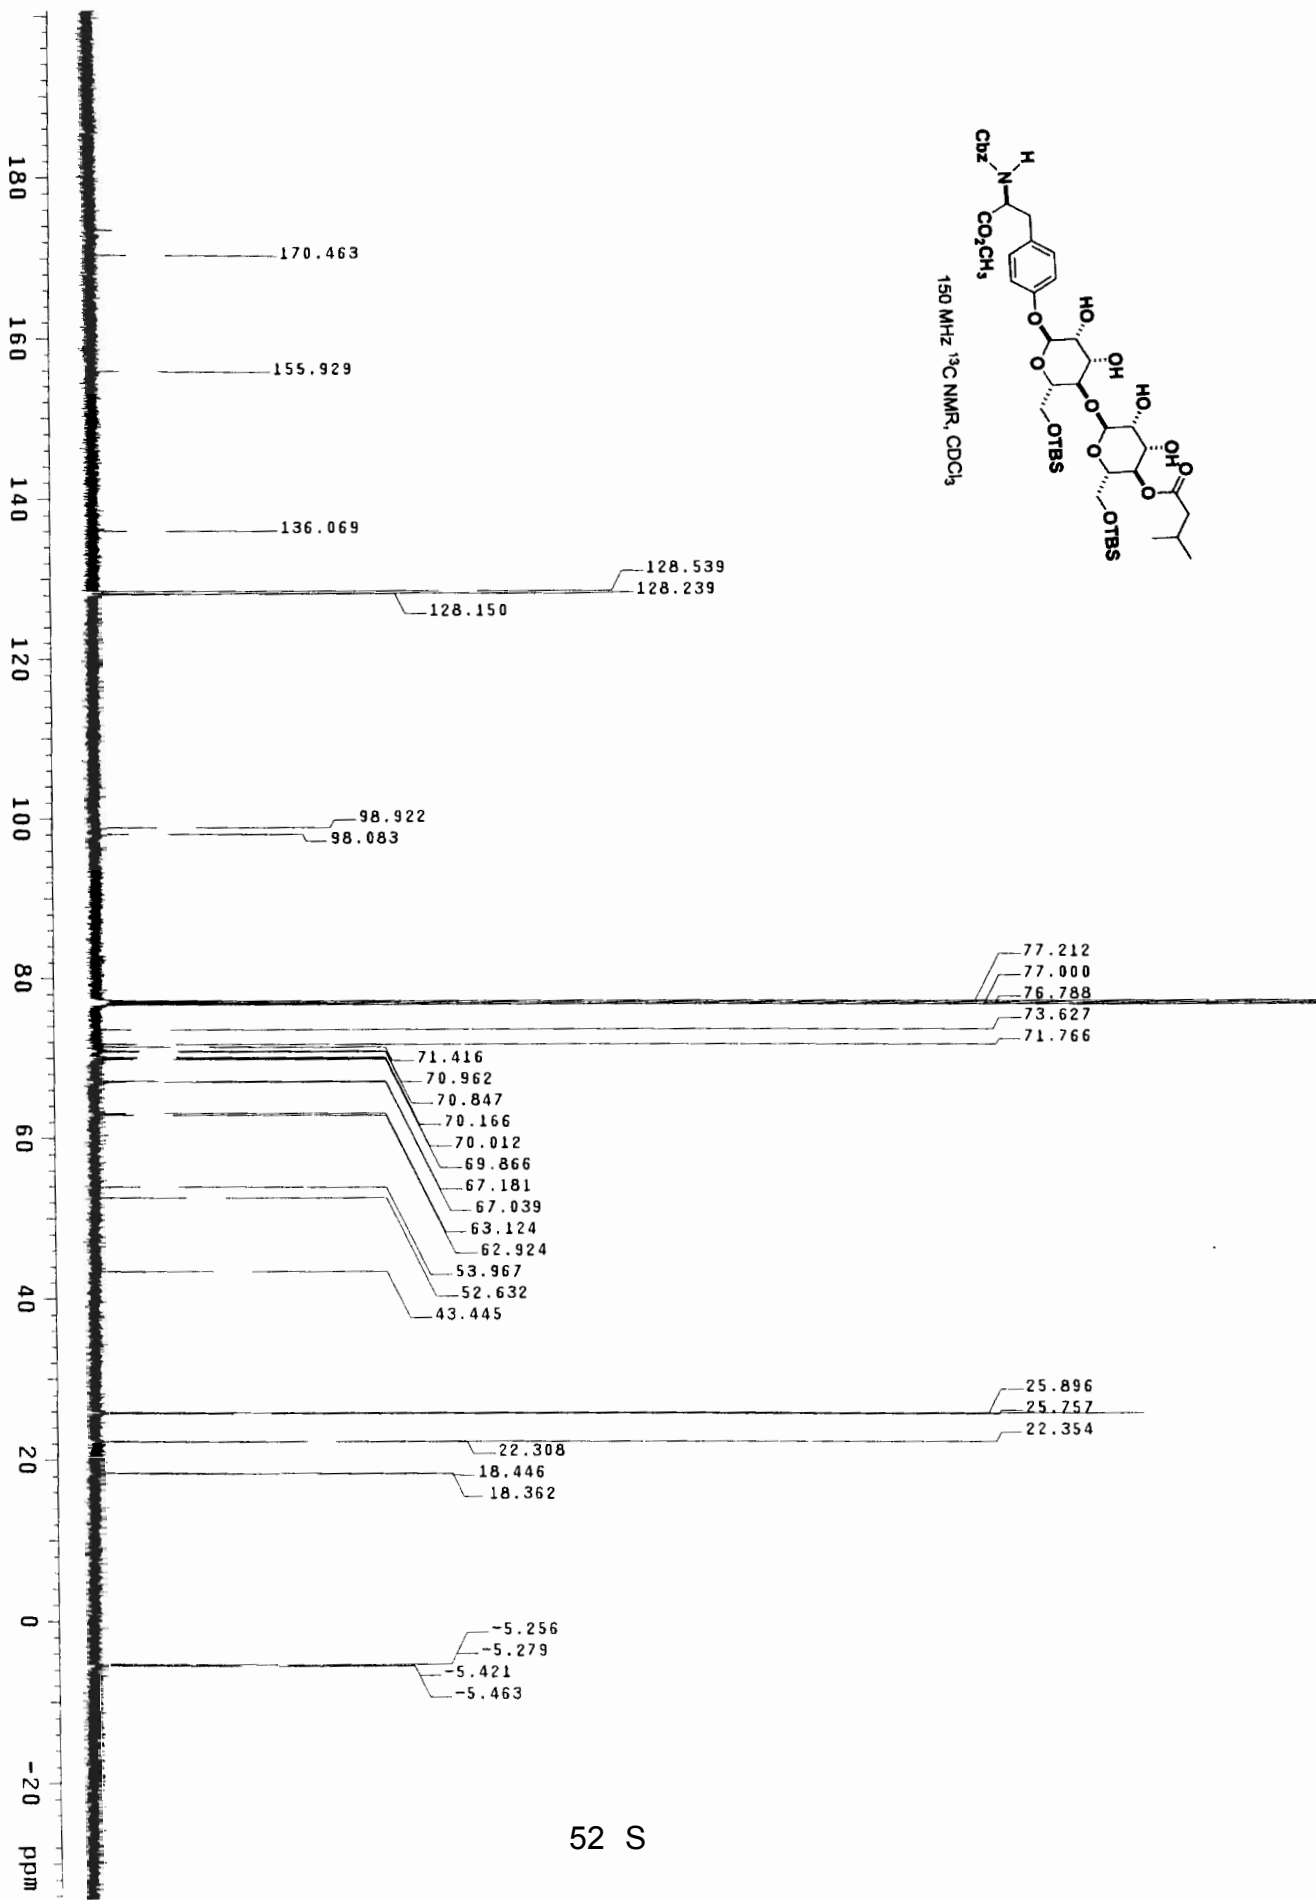

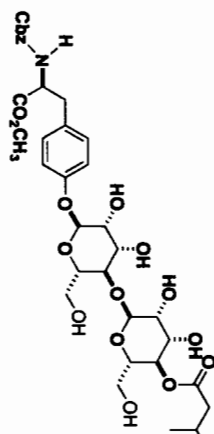

600 MHz <sup>1</sup>H NMR, CD<sub>3</sub>OD

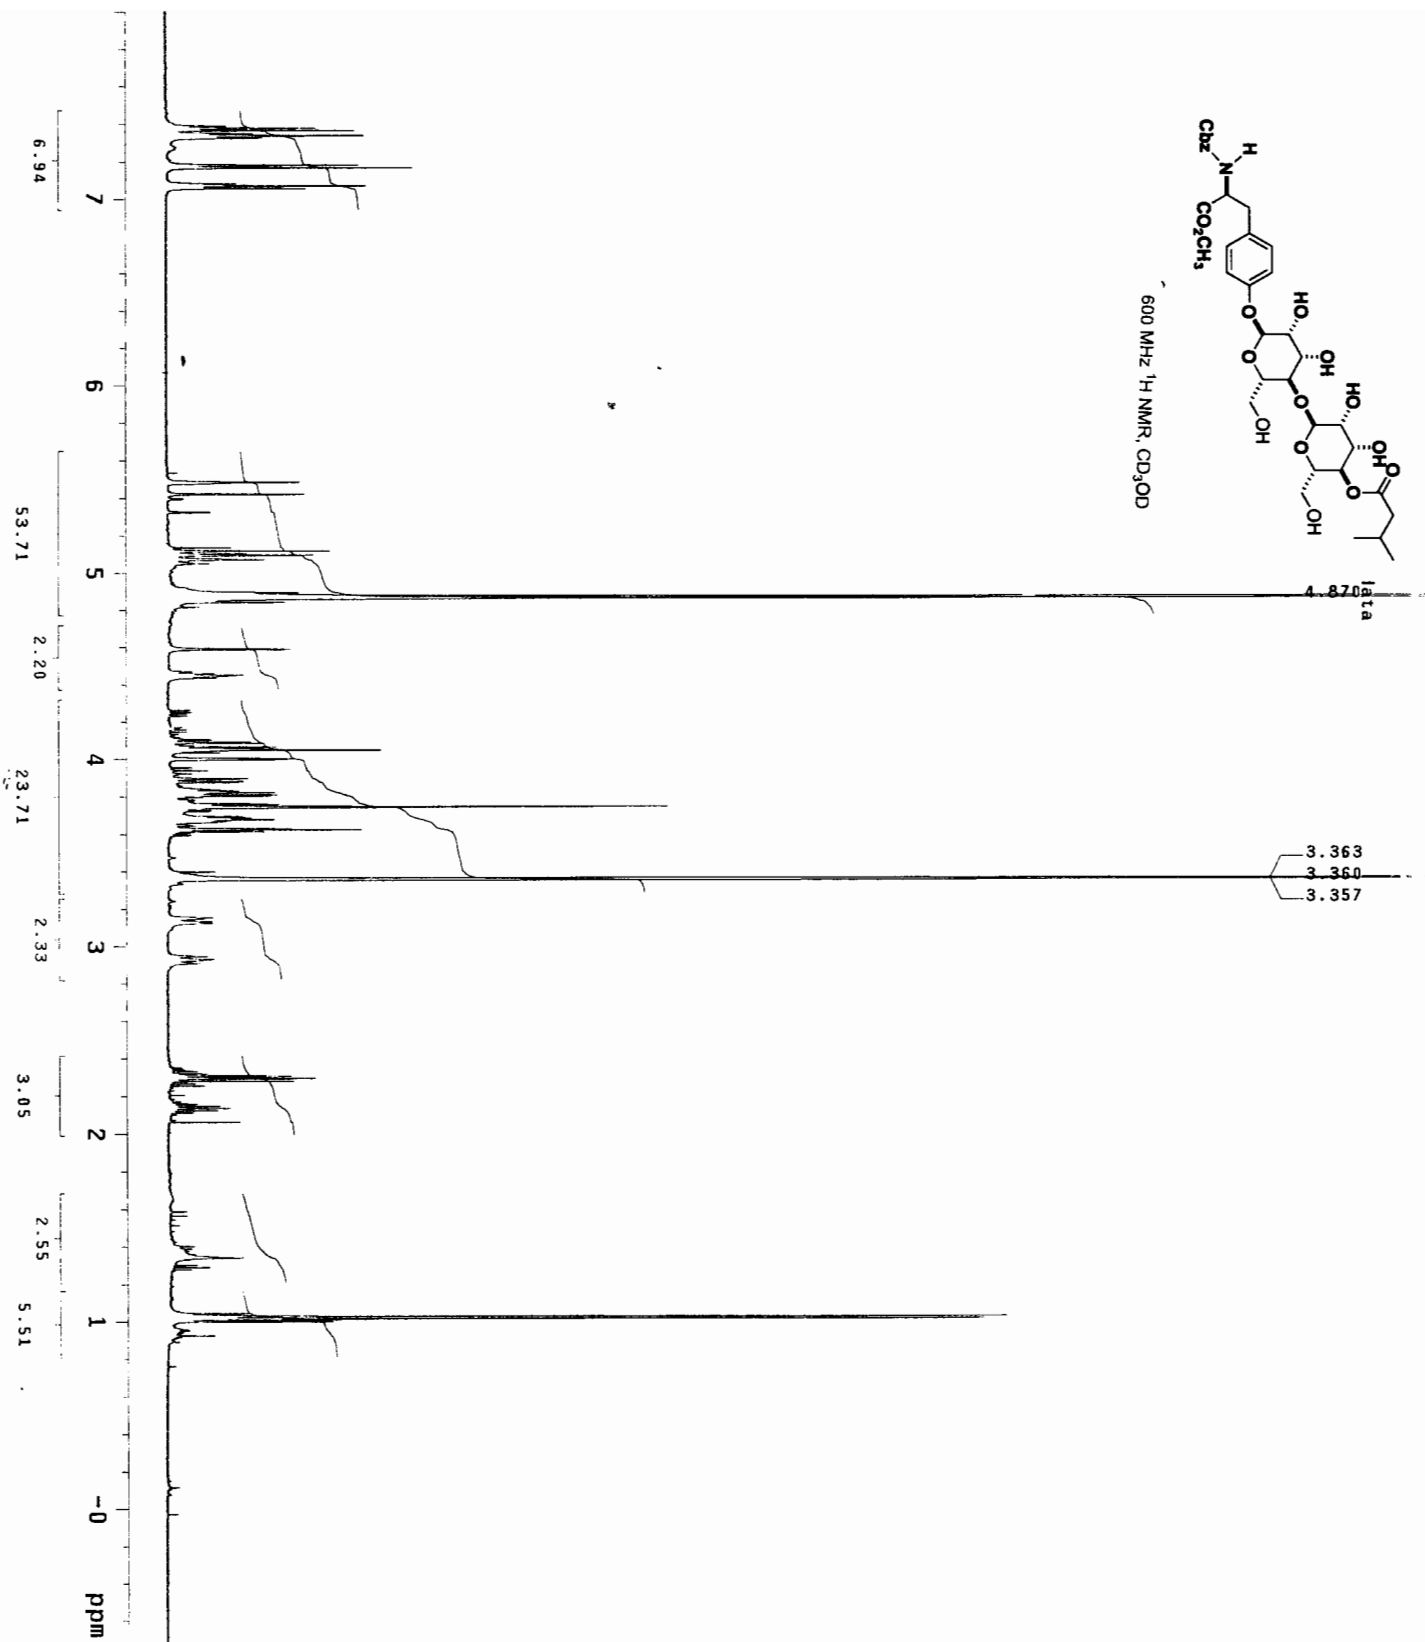

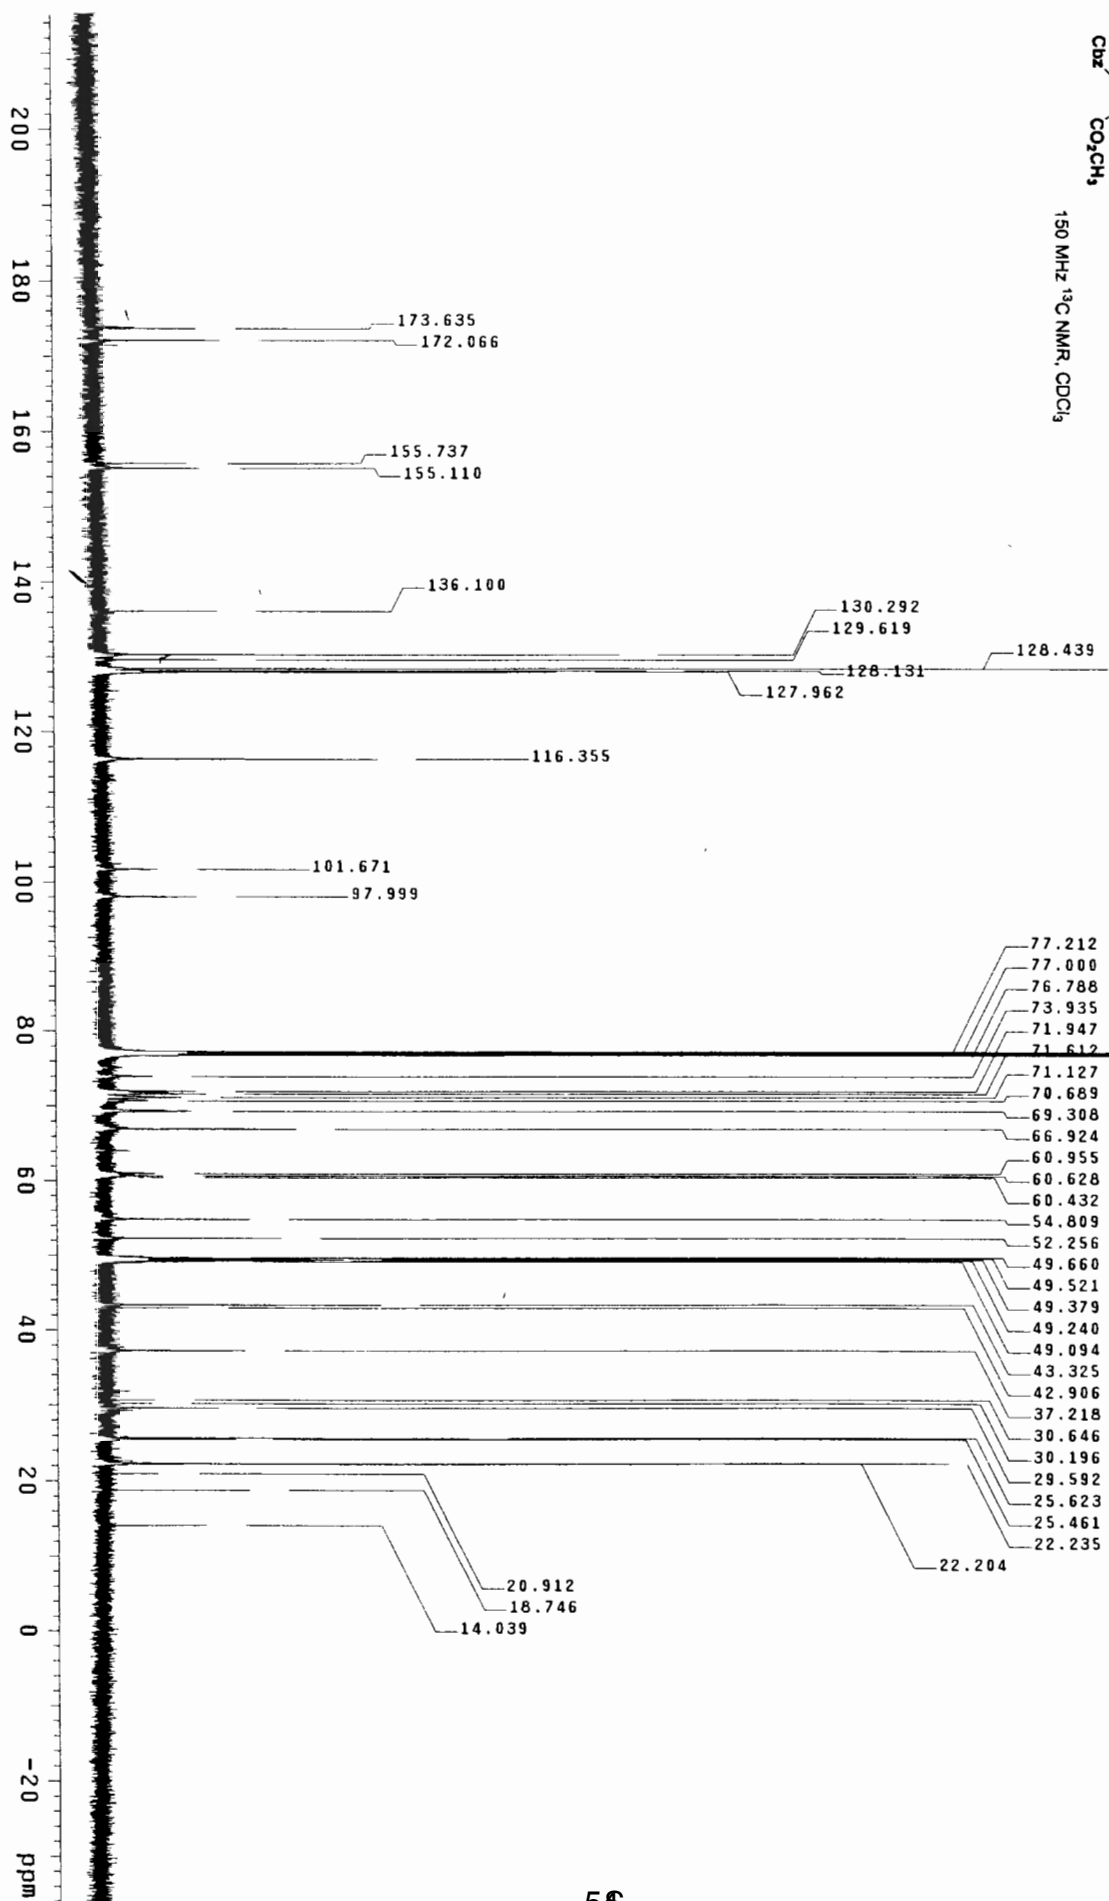

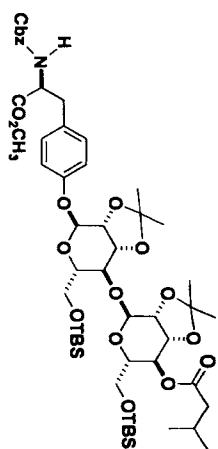

600 MHz <sup>1</sup>H NMR, CDCl<sub>3</sub>

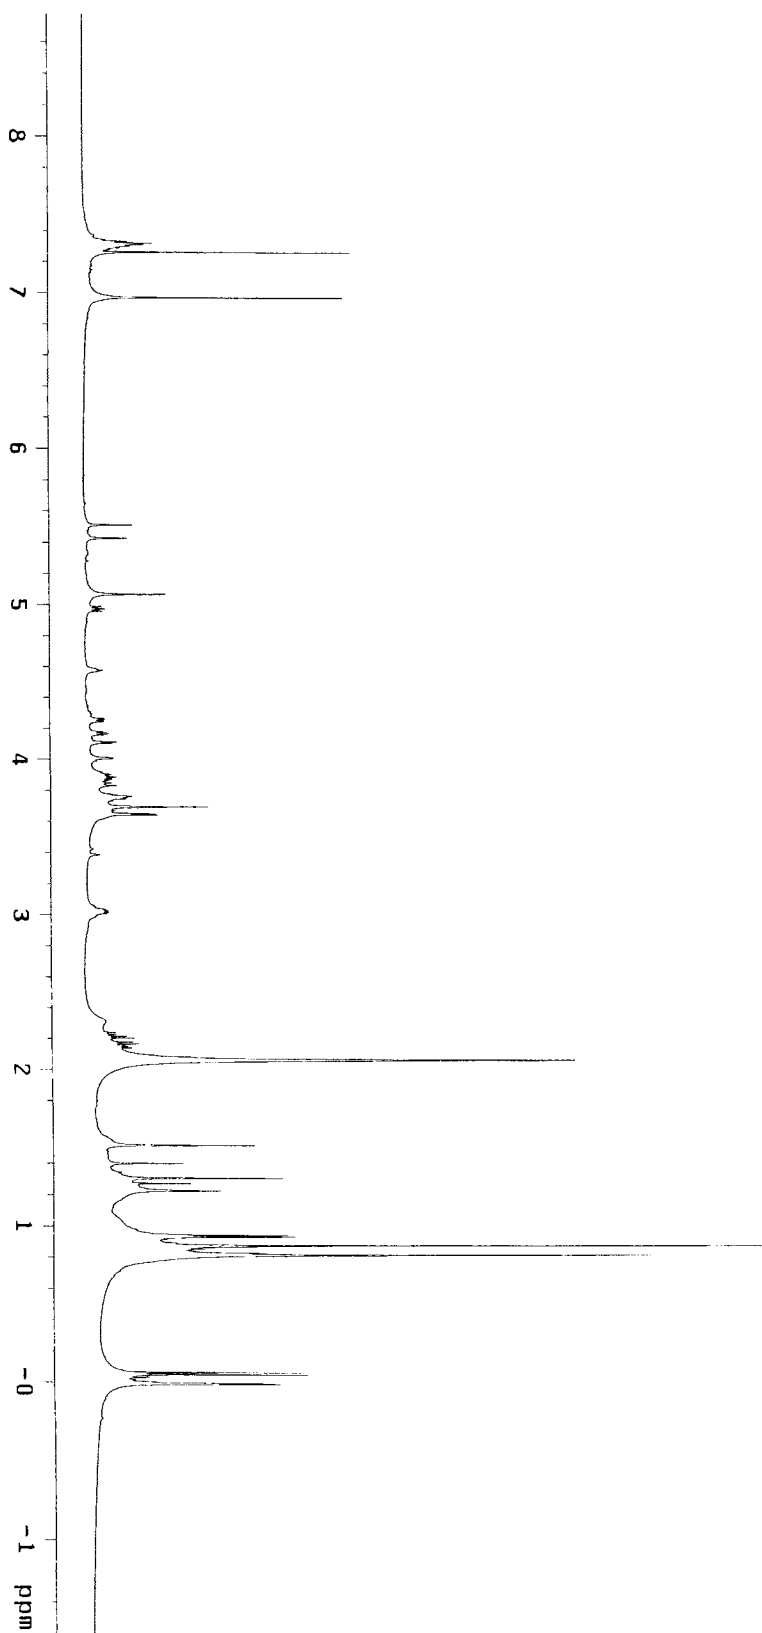

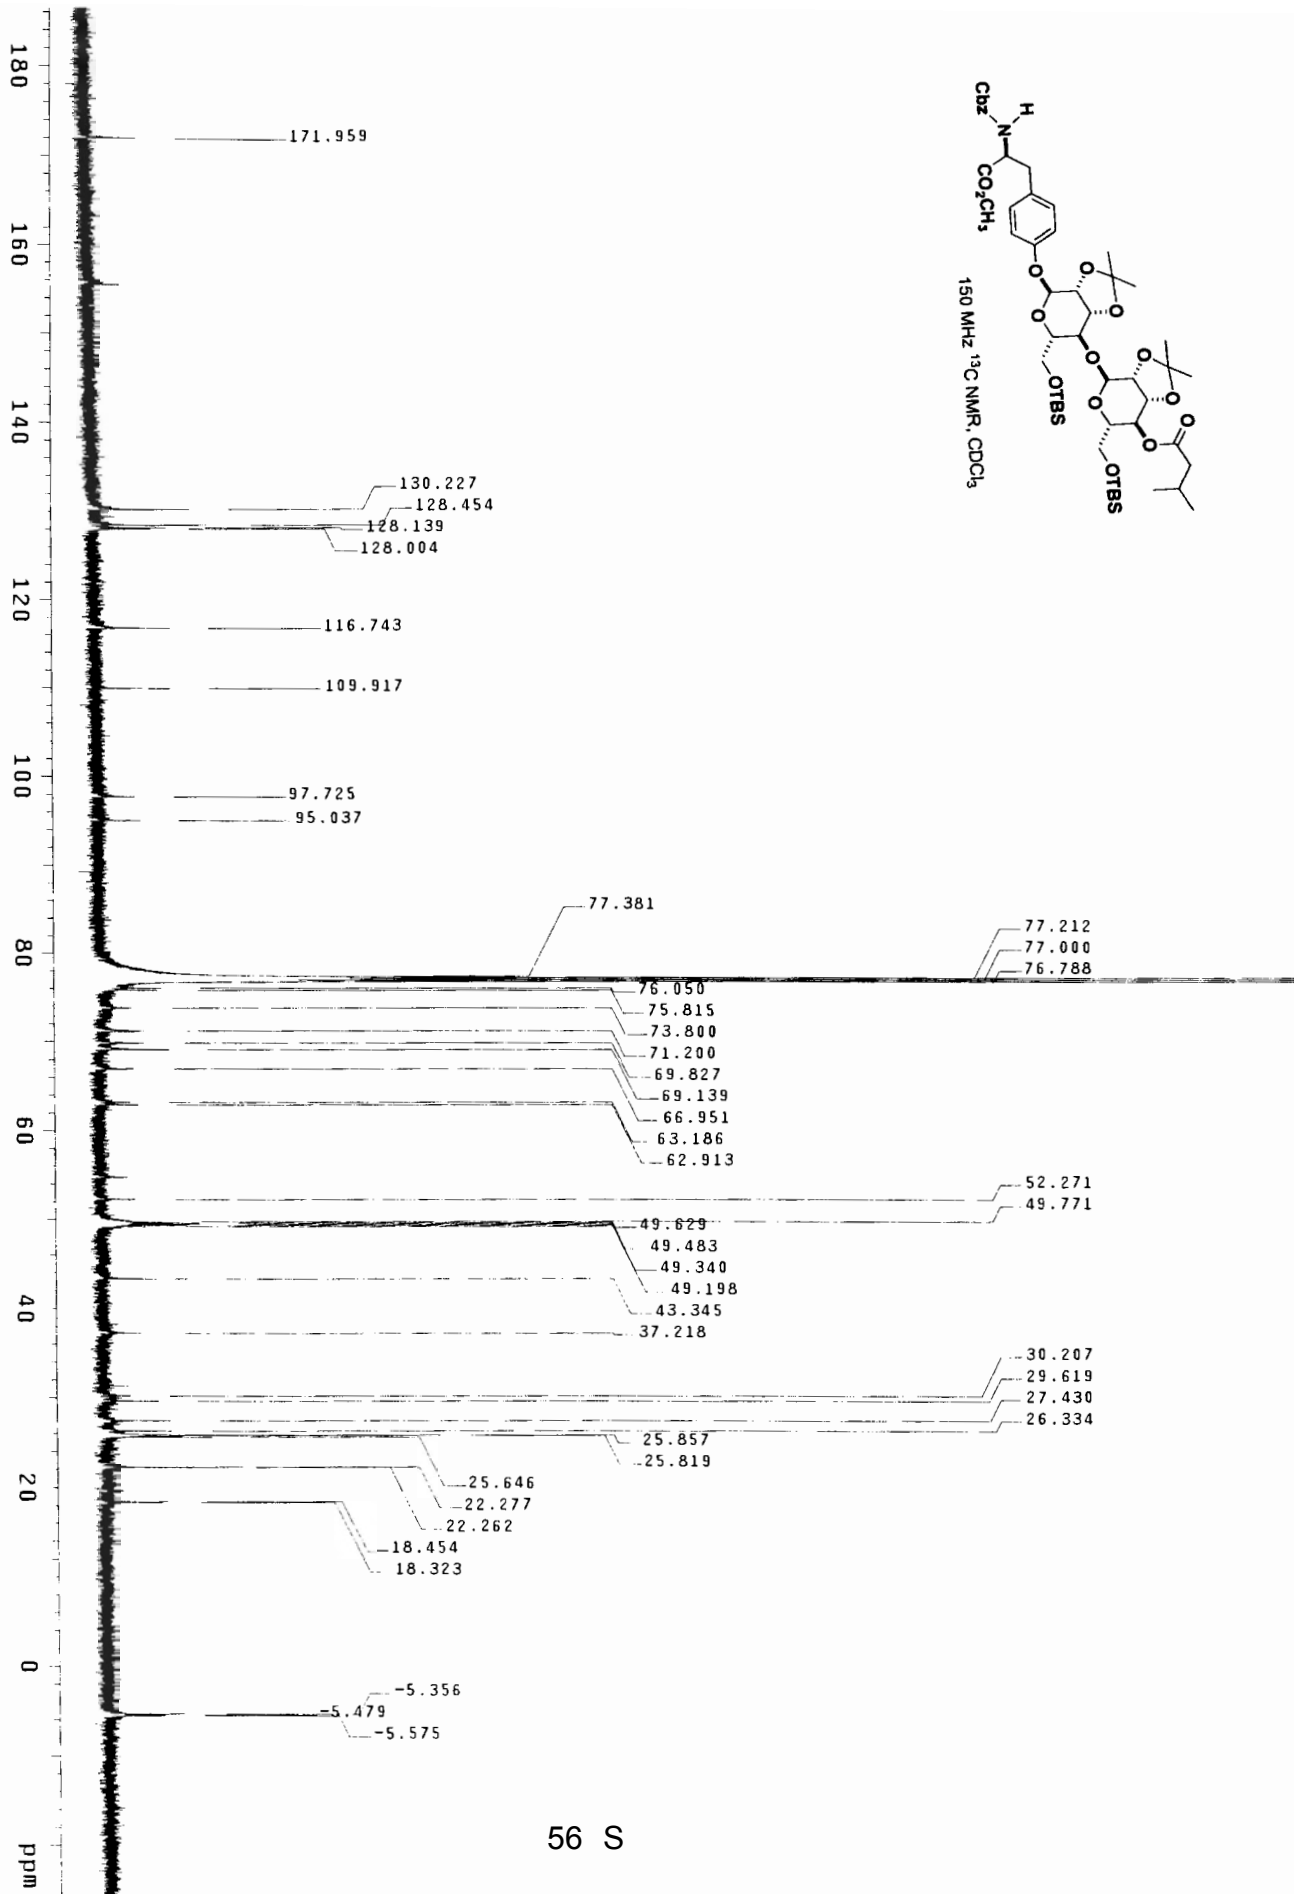



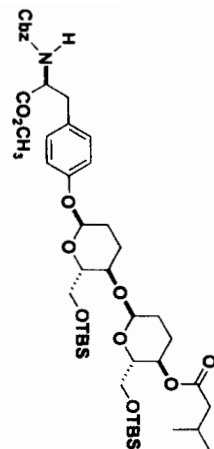

600 MHz  $^1\text{H}$  NMR,  $\text{CDCl}_3$

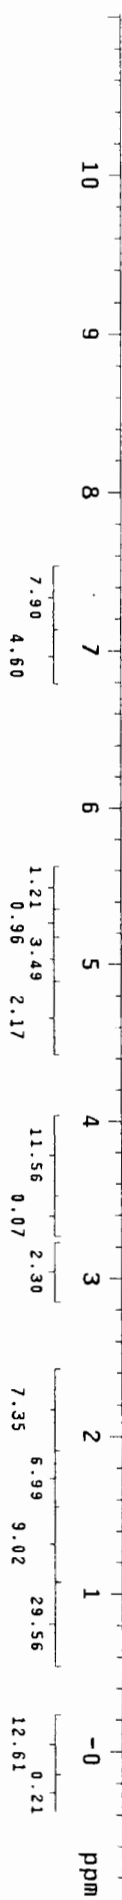

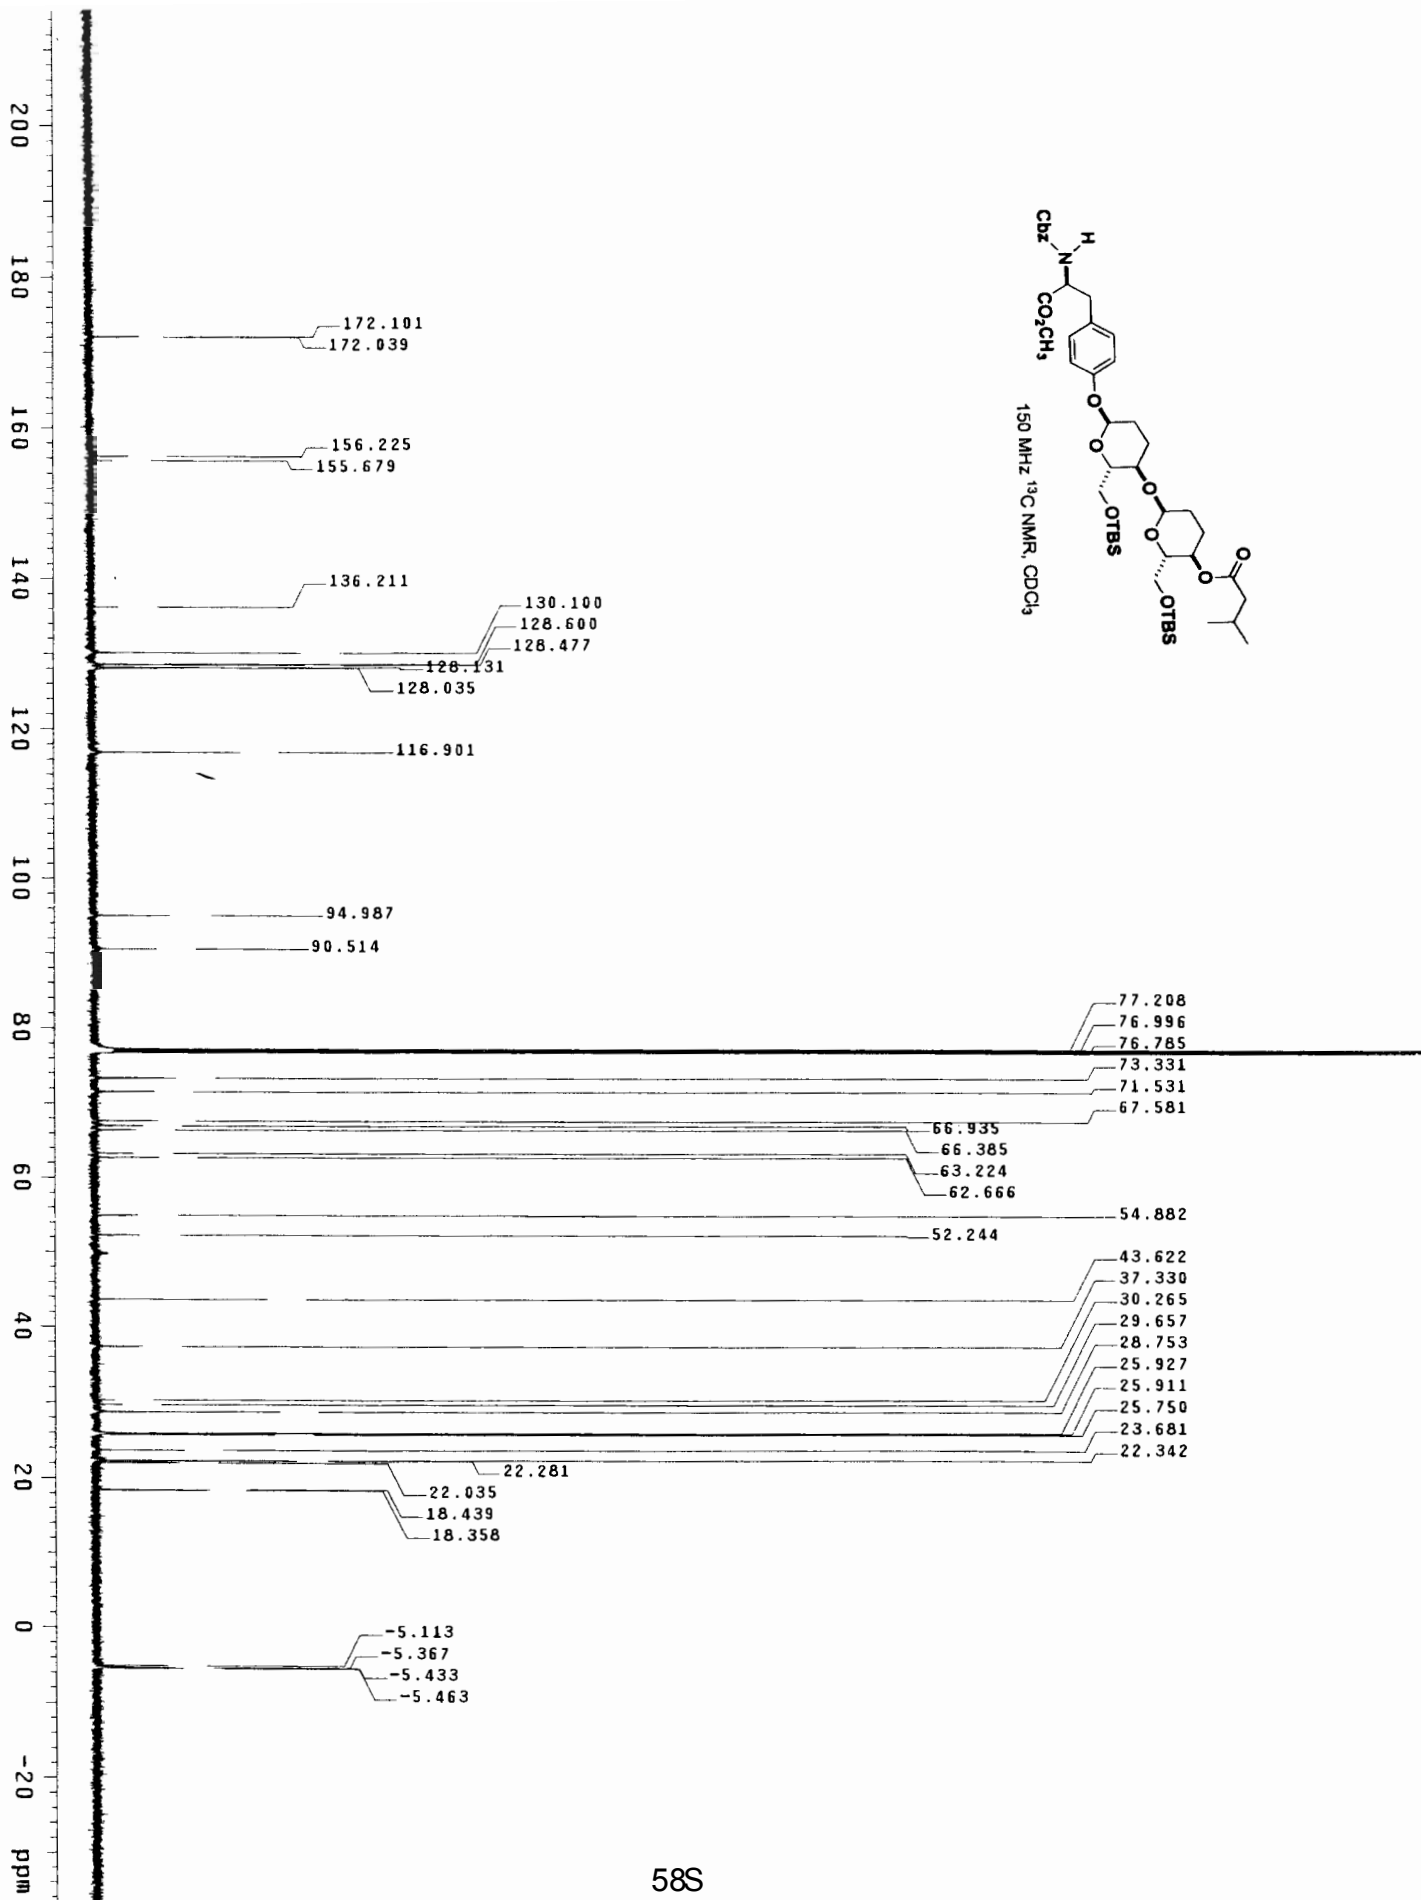

The relative stereochemistry of **3a** and **14a** was determined by various coupling constants from a series of  $^1\text{H}$ NMR experiments

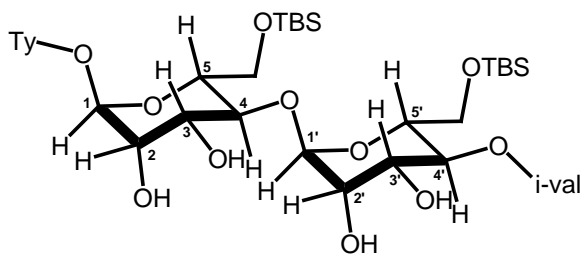

Compound-**3a**

$H_1, H_2$   $J = 1.8$  Hz  
 $H_2, H_3$   $J = 4.2$  Hz  
 $H_3, H_4$   $J = 10.2$  Hz  
 $H_4, H_5$   $J = 10$  Hz

$H_{1'}, H_{2'}$   $J = 1.2$  Hz  
 $H_{2'}, H_{3'}$   $J = 6.0$  Hz  
 $H_{3'}, H_{4'}$   $J = 10.2$  Hz  
 $H_{4'}, H_{5'}$   $J = 10.8$  Hz

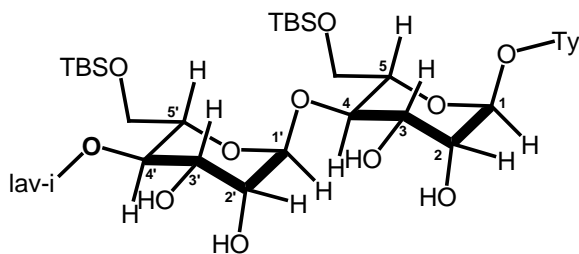

Compound-**14a**

$H_1, H_2$   $J = 1.8$  Hz  
 $H_2, H_3$   $J = 4.6$  Hz  
 $H_3, H_4$   $J = 9.0$  Hz  
 $H_4, H_5$   $J = 10.2$  Hz

$H_{1'}, H_{2'}$   $J = 1.8$  Hz  
 $H_{2'}, H_{3'}$   $J = 5.4$  Hz  
 $H_{3'}, H_{4'}$   $J = 9.6$  Hz  
 $H_{4'}, H_{5'}$   $J = 10.2$  Hz
